# Supplementary material for: Major Structural Differences and Novel Potential Virulence Mechanisms from the Genomes of Multiple Campylobacter Species
Source: PLoS Biol. 2005 Jan 4;3(1):e15. doi: 10.1371/journal.pbio.0030015 (PMC539331; doi:10.1371/journal.pbio.0030015)
Supplement: Table S3 — (22 KB XLS). [file pbio.0030015.st003.xls]

## Sheet: Sheet1
Table S3: Campylobacter jejuni, Campylobacter coli, Campylobacter lari, and Campylobacter upsaliensis restriction-modification (R/M) systems
C. jejuni RM1221:
Gene(s)	Type	Comment/description
CJE1720-CJE1724	I	hsdR1/rloC/hsdS2/mloA/hsdM1 (Type IAB family).
CJE0031	IIS	Cj0031/32 homolog: Poly GC tract mutated to fuse ORFs.
CJE0789	IIS	Cj0690c homolog.
CJE1195	II	Cj1051c homolog: Encodes CjeI.
CJE0731	III	III (mod-1): Similar to Helicobacter pylori J99 ORF JHP1296.
CJE0732	III	III (res-1): Similar to Helicobacter pylori J99 ORF JHP1297
CJE0134		Cj0139 homolog: Putative Mcr-like endonuclease.
CJE1061		Cj0979c homolog: Putative endonuclease.
CJE0150		Cj0154c homolog: Methyltransferase.
CJE0201		Cj0208 homolog: Methyltransferase (Methylates EcoRI restriction sites).
CJE0310		Methyltransferase.
CJE1635		Cj1461 homolog: Methyltransferase
C. jejuni NCTC 11168:
Gene(s)	Type	Comment/description
Cj1549c-Cj1553c	I	hsdR3/rloH/hsdS8/mloB/hsdM3 (Type IF family).
Cj0031/32	IIS	Fused by slipped strand mispairing (G10 - split, G9 - fused).
Cj0690c	IIS	Putative.
Cj1051c	II	Encodes CjeI.
Cj0139		Putative Mcr-like endonuclease.
Cj0979c		Putative endonuclease.
Cj0154c		Methyltransferase.
Cj0208		Methyltransferase (Methylates EcoRI restriction sites).
Cj1461		Methyltransferase.
C. lari RM2100:
Gene(s)	Type	Comment/description
CLA0703-CLA0708	I	hsdR1/rloEK/hsdS13/mloC/hsdM1 (Type IAB family; hsdS13 has hsdS10 CRD).
CLA0228	IIS	Cj0031/32 homolog: Poly GC tract mutated to fuse ORFs.
CLA0922	IIS	Cj0031/32 homolog: Poly GC tract mutated to fuse ORFs.
CLA0929		Cj0979c homolog: Putative endonuclease.
CLA1253		Putative endonuclease.
CLA0268		Cj0154c homolog: Methyltransferase.
CLA0077		Cj0208 homolog: Methyltransferase (Methylates EcoRI restriction sites).
CLA0763		Cj1461 homolog: Methyltransferase.
C. upsaliensis RM3195:
Gene(s)	Type	Comment/description
CUP0198-CUP0200	I	hsdM1/hsdS1/hsdR1 (Type IG family).
CUP1004-CUP1007	I	hsdS2/hsdM2/hsdR2 (Type IA family).
CUP1391-CUP1393	I	hsdM3/hsdR3/hsdS3 (Type IC family; hsdM has 15 bp GC tract).
CUP1744-CUP1746	I	hsdM4/hsdS4 (Type IH family).
CUP1058/CUP1059	IIS	IIS (res-1): Gene split into 2 ORFs; Similar to H. pylori 26695 and J99 ORFs HP1366 and JHP1442, respectively.
CUP1060-CUP1062	IIS	IIS (mod-1): Contains 15 bp GC tract; Similar to HP1367.
CUP1438	II	II (res-2); Similar to JHP0630.
CUP1439	II	II (mod-2); Similar to JHP0629: Cytosine-specific.
CUP1731-CUP1734	II	Cj1051c homolog: Encodes CjeI. Coding region fragmented and presumably non-functional.
CUP0798/CUP0799	III	III (mod-3); Contains 16 bp GC tract; Similar to HP1522 and JHP1411 (both H. pylori ORFs also contain GC tract).
CUP0800	III	III (res-3); Similar to HP1521 and JHP1410.
CUP1577	III	III (mod-4); CJE0731 homolog.
CUP1578	III	III (res-4); CJE0732 homolog.
CUP0099		Cj0979c homolog: Putative endonuclease.
CUP0023		Methyltransferase (mod-5); Similar to HH1050 (Helicobacter hepaticus), HP1208, JHP1131.
CUP0235		Methyltransferase (mod-6); Similar to methylase from Thermoplasma volcanium.
CUP0237		Methyltransferase (mod-7); Similar to HP0481, JHP0433.
CUP0706		CJE0310 homolog: Methyltransferase (mod-8).
CUP0945		Methyltransferase (mod-9): Cytosine-specific.
CUP1121		Methyltransferase (mod-10); Similar to HP0263, JHP0248.
CUP1283		Methyltransferase (mod-11): Cytosine-specific; Similar to HP1121, JHP1050.
CUP1468		Methyltransferase (mod-12); Similar to HP0054.
CUP1474		Methyltransferase (mod-13); Similar to HP0051, JHP0435: Cytosine-specific.
CUP1477		Methyltransferase (mod-14); Similar to HP0369, JHP1012.
CUP1488		Cj0208 homolog: Methyltransferase (mod-15; Methylates EcoRI restriction sites).
CUP1489		Methyltransferase (mod-16); Similar to HH1050, HP1208, JHP1131.
CUP1490		Methyltransferase (mod-17); Similar to methylase from Fusobacterium nucleatum.
CUP1661		Methyltransferase (mod-18); Similar to HH1050, HP1208, JHP1131.
CUP1769		Methyltransferase (mod-19); Similar to HP1352, JHP1271.
C. coli RM2228:
Gene(s)	Type	Comment/description
CCO1661-CCO1666	I	hsdR1/rloIJ/hsdS12/mloA/hsdM1 (Type IAB family).
CCO0070/CUP0071	IIS	Cj0031/32 homolog: Fused by slipped strand mispairing (G10 - split, G9 - fused).
CCO1119	II	Cj1051c homolog: Encodes CjeI.
CCO1045		Cj0979c homolog: Putative endonuclease.
CCO1723		Cj0154c homolog: Methyltransferase.
CCO0298		Cj0208 homolog: Methyltransferase (Methylates EcoRI restriction sites).
CCO1115		CJE0310 homolog: Methyltransferase.
CCO1568		Cj1461 homolog: Methyltransferase.
