# Supplementary material for: Major Structural Differences and Novel Potential Virulence Mechanisms from the Genomes of Multiple Campylobacter Species
Source: PLoS Biol. 2005 Jan 4;3(1):e15. doi: 10.1371/journal.pbio.0030015 (PMC539331; doi:10.1371/journal.pbio.0030015)
Supplement: Table S4 — (16 KB XLS). [file pbio.0030015.st004.xls]

## Sheet: Sheet1
Table S4. Putative DNA Competence genes
Class	CTS gene sym (45)	C. jejuni NCTC11168	C. jejuni RM1221	C. coli RM2228	C. lari RM2100	C. upsaliensis RM3195	Class characteristics	B. subtilis protein
I	ctsE	Cj1471c	CJE1644	CCO1577	CLA0754 (CLAA0023)	CUP1815	Walker A (and B) box	ComGA
II	ctsF	Cj1470c	CJE1643	CCO1576	CLA0755	CUP1814	Membrane protein	ComGB
III	ctsG	Cj1343c	CJE1532	CCO1449	CLA0149	CUP0252	Pseudopilin? - found by tag*	ComGC
	-	Cj0683	CJE0781	CCO0749	CLA1565	CUP0818	BLAST hit to pulG & tag*
	ctsT	Cj1077	CJE1220	CCO1151	CLA1335	CUP0909	BLAST hit to pulG & tag*	ComGD
	-	Cj1078	CJE1221	CCO1152	CLA1334	CUP0908	BLAST hit to other campy & tag*
	-	Cj0431	CJE0481	CCO0517	CLA0796	CUP1516	found by tag*
IV	-	Cj0825	CJE0912	CCO0885	CLA1355	CUP0398	Prepilin peptidase	ComC
V	ctsD	Cj1474c	CJE1647	CCO1580	CLA0752	CUP1818	Secretin	Not present
	ctsR	Cj1475c	CJE1648	CCO1581	-	CUP1819
	ctsP	Cj1473c	CJE1646	CCO1579	-	CUP1817
	ctsX	Cj1472c	CJE1645	CCO1578	-	CUP1816
*Pattern: <mx(1,10)[krqdv][ag]fxxxe[gavlipmfwystcenqk](17,20)
