# Supplementary material for: Major Structural Differences and Novel Potential Virulence Mechanisms from the Genomes of Multiple Campylobacter Species
Source: PLoS Biol. 2005 Jan 4;3(1):e15. doi: 10.1371/journal.pbio.0030015 (PMC539331; doi:10.1371/journal.pbio.0030015)
Supplement: Table S9 — (894 KB XLS). [file pbio.0030015.st009.xls]

## Sheet: combined.results_mat#198FAA.txt
Table S9. Match table depicting bi-directional best matches of sequenced e-Proteobacteria
RM1221	NCTC 11168	ATCC51449	26695	J99	DSMZ1740
CJE0001	dnaA_6967506 (99.32%)	dnaA_32262660 (43.19%)	dnaA_2314709 (39.41%)	dnaA_4156038 (39.41%)	dnaA_34482173 (52.91%)
CJE0002	dnaN_6967507 (98.87%)	dnaN_32262676 (43.94%)	dnaN_2313610 (35.61%)	dnaN_4154988 (35.33%)	DNAN_34482174 (43.38%)
CJE0003	gyrB_6967508 (99.22%)	gyrB_32262677 (67.40%)	gyrB_2313611 (61.50%)	gyrB_4154989 (61.37%)	gyrB_34482175 (69.82%)
CJE0004	Cj0004c_6967509 (100.00%)
CJE0005	Cj0005c_6967510 (100.00%)
CJE0006	Cj0006_6967511 (99.31%)		HP0758_2313884 (46.99%)	jhp0695_4155261 (48.25%)	WS0129_34482292 (54.86%)
CJE0007	gltB_6967512 (99.73%)				WS1202_34483288 (42.17%)
CJE0008	gltD_6967514 (98.96%)
CJE0009	rnhB_6967515 (100.00%)		rnhB_2314491 (42.70%)	rnhB_4155855 (42.16%)	rnhB_34483747 (44.57%)
CJE0010	Cj0011c_6967516 (100.00%)				WS0136_34482298 (46.25%)
CJE0011	Cj0012c_6967517 (99.45%)				WS1374_34483443 (70.88%)
CJE0012	ilvD_6967518 (98.92%)	HH0850_32262399 (68.65%)			ILVD_34482293 (67.62%)
CJE0015	Cj0015c_6967520 (99.75%)	HH0169_32261716 (40.75%)	HP0711_2313843 (35.09%)
CJE0016	Cj0016_6967521 (100.00%)
CJE0017	Cj0017c_6967522 (99.80%)		HP0595_2313718 (36.45%)	jhp0542_4155079 (37.38%)
CJE0018	Cj0018c_6967523 (100.00%)		HP0594_2313720 (49.09%)	jhp0541_4155078 (47.27%)
CJE0019	Cj0019c_6967524 (98.65%)
CJE0020	Cj0020c_6967525 (98.68%)
CJE0021	Cj0021c_6967526 (99.66%)	HH1189_32262739 (50.76%)
CJE0022	Cj0022c_6967527 (97.00%)	sfhB_32262284 (37.94%)	HP0347_2313436 (41.45%)	jhp0321_4154858 (41.45%)	WS0417_34482561 (38.97%)
CJE0023	purB_6967528 (99.10%)	purB_32262904 (74.38%)	purB_2314263 (67.65%)	purB_4155619 (67.35%)	PURB_34482560 (78.05%)
CJE0024	nrdA_6967529 (99.49%)	nrdA_32263326 (69.76%)	nrdA_2313806 (69.25%)	nrdA_4155174 (69.38%)	NRDA_34483789 (72.88%)
CJE0025	Cj0025c_6967530 (98.70%)
CJE0026	Cj0026c_6967531 (100.00%)	HH1120_32262670 (64.46%)	HP1533_2314712 (56.31%)	jhp1421_4156042 (54.37%)	WS2228_34481795 (71.71%)
CJE0027	pyrG_6967532 (99.63%)	pyrG_32262901 (62.94%)	pyrG_2313438 (62.78%)	pyrG_4154844 (62.41%)	PYRG_34482381 (65.30%)
CJE0028	recJ_6967533 (100.00%)	recJ_32262902 (38.77%)	recJ_2313437 (38.55%)	recJ_4154859 (40.12%)	RECJ_34482382 (46.65%)
CJE0029	ansA_6967534 (98.79%)	ansB_32262211 (65.86%)	ansB_2313847 (46.48%)	ansB_4155215 (45.43%)	ansB_34482790 (49.24%)
CJE0030	Cj0030_6967535 (98.49%)
CJE0031				jhp1409_4156028 (41.37%)
CJE0032
CJE0033	Cj0034c_6967539 (100.00%)				WS0375_34482523 (50.85%)
CJE0034	Cj0035c_6967540 (99.25%)				WS1014_34483117 (45.71%)
CJE0035	Cj0036_6967541 (99.78%)		HP1143_2314299 (38.55%)	jhp1071_4155657 (38.94%)
CJE0036	Cj0037c_6967542 (100.00%)
CJE0037	Cj0038c_6967543 (97.67%)
CJE0038	typA_6967544 (100.00%)	yihK_32263324 (76.79%)	yihK_2313589 (77.46%)	jhp0432_4154969 (77.46%)	TYPA_34483788 (77.18%)
CJE0039	Cj0040_6967545 (100.00%)
CJE0040	Cj0041_6967546 (98.83%)
CJE0041	flgD_6967547 (100.00%)
CJE0042	flgE_6967548 (100.00%)
CJE0043	Cj0044c_6967549 (99.68%)
CJE0044	Cj0045c_6967550 (98.74%)
CJE0045
CJE0048	trmU_6967551 (100.00%)	trmU_32262506 (49.57%)	HP1335_2314503 (45.77%)	trmU_4155868 (46.49%)	WS1636_34483670 (49.41%)
CJE0049	Cj0054c_6967552 (100.00%)				WS0656_34482786 (38.22%)
CJE0050
CJE0051
CJE0052
CJE0053
CJE0054	Cj0057_6967555 (96.13%)
CJE0055	Cj0058_6967556 (96.98%)
CJE0056	fliY_6967557 (99.27%)	fliY_32262698 (42.50%)	fliY_2314175 (39.86%)	jhp0394_4154923 (41.99%)	fliY_34483671 (46.45%)
CJE0057	fliM_6967558 (100.00%)	fliM_32262697 (64.69%)	fliM_2314176 (61.13%)	fliM_4154924 (61.13%)	WS1638_34483672 (68.63%)
CJE0058	fliA_6967559 (100.00%)	fliA_32262696 (61.75%)	fliA_2314177 (57.66%)	fliA_4154925 (58.56%)	FLIA_34483673 (60.99%)
CJE0059	Cj0062c_6967560 (100.00%)
CJE0060	Cj0063c_6967561 (100.00%)	HH1144_32262694 (46.34%)	ylxH_2314178 (45.73%)	jhp0390_4154927 (46.08%)	WS1641_34483675 (56.90%)
CJE0061	flhF_6967562 (99.38%)	flhF_32262693 (39.02%)	flhF_2314179 (43.84%)	flhF_4154928 (44.01%)	FLHF_34483676 (41.74%)
CJE0062	folK_6967563 (100.00%)	folK_32262692 (37.72%)	folK_2314180 (35.62%)	folK_4154911 (35.42%)	FOLK_34483677 (38.62%)
CJE0063	aroQ_6967564 (100.00%)	HH0945_32262495 (57.69%)	aroQ_2314182 (51.55%)	aroD_4154913 (51.55%)	AROQ_34483679 (62.03%)
CJE0064	Cj0067_6967565 (98.78%)	HH1764_32263316 (37.95%)	HP0267_2313359 (41.75%)	orf1_4154769 (41.75%)	WS1477_34483535 (42.62%)
CJE0065	pspA_6967566 (99.33%)	HH1692_32263244 (39.51%)	PspA_2314611 (41.79%)	sppA_4155951 (41.43%)	WS1476_34483534 (43.01%)
CJE0066	Cj0069_6967567 (99.06%)
CJE0067	Cj0070c_6967568 (96.15%)
CJE0069	Cj0073c_6967569 (98.17%)	HH0652_32262201 (35.62%)	HP0137_2313227 (41.78%)	jhp0125_4154632 (41.59%)
CJE0070	Cj0074c_6967570 (99.37%)	HH0651_32262200 (58.11%)	HP0138_2313222 (58.14%)	jhp0126_4154633 (58.14%)
CJE0071	Cj0075c_6967571 (98.78%)	HH0650_32262199 (61.34%)	HP0139_2313223 (61.09%)	jhp0127_4154634 (61.51%)
CJE0072	lctP_6967572 (100.00%)		lctP_2313225 (61.15%)	lldP_2_4154650 (61.12%)
CJE0073	cdtC_6967573 (100.00%)	cdtC_32262999 (43.24%)
CJE0074	cdtB_6967574 (99.62%)	cdtB_32262998 (56.78%)
CJE0075	cdtA_6967575 (99.63%)
CJE0076	Cj0080_6967576 (100.00%)
CJE0077	cydA_6967577 (99.81%)	cydA_32262653 (77.47%)			CYDA_34483870 (74.51%)
CJE0078	cydB_6967578 (98.40%)	cydB_32262652 (68.00%)			CYDB_34483869 (59.47%)
CJE0079
CJE0080	Cj0085c_6967579 (99.13%)				WS0774_34482890 (35.00%)
CJE0081	ung_6967580 (99.57%)	ung_32262799 (57.26%)	HP1347_2314518 (49.10%)	ung_4155886 (49.55%)	UNG_34482691 (57.27%)
CJE0082	aspA_6967581 (100.00%)	fumC_32262271 (76.45%)	aspA_2313768 (67.83%)	aspA_4155137 (67.83%)	ASPA_34482792 (70.65%)
CJE0083	dcuA_6967582 (99.55%)		dcuA_2313848 (60.96%)	dcuA_4155216 (60.73%)	WS0661_34482791 (61.54%)
CJE0084	Cj0089_6967583 (96.47%)
CJE0085	Cj0090_6967584 (97.54%)
CJE0086	Cj0091_6967585 (99.03%)	HH1862_32263414 (48.52%)
CJE0087	Cj0092_6967586 (99.55%)
CJE0088	Cj0093_6967587 (99.50%)
CJE0089	rplU_6967588 (100.00%)	rplU_32261557 (59.22%)	HP0296_2313394 (58.82%)	rplU_4154806 (58.82%)	WS0503_34482640 (57.28%)
CJE0090	rpmA_6967589 (100.00%)	rpmA_32261556 (80.95%)	HP0297_2313395 (85.19%)	rpmA_4154807 (85.19%)	RPMA_34482641 (89.29%)
CJE0091	Cj0096_6967590 (99.14%)	HH0008_32261555 (61.78%)	HP0303_2313401 (60.80%)	jhp0288_4154802 (60.80%)	WS0505_34482642 (58.03%)
CJE0092	proB_6967591 (99.60%)	proB_32261967 (47.58%)			PROB_34482643 (50.98%)
CJE0093	fmt_6967592 (99.67%)	fmt_32261968 (42.07%)	HP1141_2314297 (52.01%)	fmt_4155662 (52.67%)	FMT_34482644 (48.52%)
CJE0094	birA_6967593 (98.62%)	birA_32261969 (38.29%)	birA_2314296 (39.90%)	jhp1068_4155661 (38.92%)	BIRA_34482645 (45.62%)
CJE0095	Cj0100_6967594 (100.00%)	parA_32261970 (63.98%)	HP1139_2314295 (61.07%)	jhp1067_4155660 (60.31%)	WS0509_34482646 (66.92%)
CJE0096	Cj0101_6967595 (99.28%)	parB_32261971 (45.91%)	HP1138_2314294 (43.17%)	jhp1066_4155659 (40.62%)	WS0510_34482647 (47.33%)
CJE0097	atpF'_6967596 (95.74%)
CJE0098	atpF_6967597 (98.24%)				ATPF_34482649 (36.02%)
CJE0099	atpH_6967598 (100.00%)
CJE0100	atpA_6967599 (100.00%)	atpA_32261975 (79.92%)	atpA_2314285 (74.55%)	atpA_4155639 (74.15%)	ATPA_34482651 (80.16%)
CJE0101	atpG_6967600 (99.66%)	atpG_32261976 (54.73%)	atpG_2314284 (52.81%)	atpG_4155638 (52.81%)	ATPG_34482652 (57.09%)
CJE0102	atpD_6967601 (100.00%)	atpD_32261977 (82.97%)	atpD_2314283 (79.53%)	atpD_4155651 (79.31%)	ATPD_34482653 (82.97%)
CJE0103	atpC_6967602 (100.00%)	atpC_32261978 (45.45%)	atpC_2314282 (40.00%)	atpC_4155650 (41.46%)	atpC_34482654 (45.24%)
CJE0104	exbB3_6967603 (98.91%)	HH0431_32261979 (45.30%)	exbB_2314281 (42.25%)	exbB_1_4155649 (42.02%)	EXBB3_34482655 (46.24%)
CJE0105	exbD3_6967604 (99.22%)	HH0432_32261980 (51.56%)	exbD_2314280 (47.62%)	exbD_1_4155648 (47.62%)	EXBD3_34482656 (50.40%)
CJE0106	Cj0111_6967605 (98.46%)
CJE0107	Cj0112_6967606 (99.50%)	HH0434_32261982 (40.47%)	tolB_2314279 (41.59%)	tolB_4155646 (41.43%)
CJE0108	pal_6967607 (100.00%)	HH0435_32261983 (41.57%)			OMP18_34482659 (50.89%)
CJE0109	Cj0114_6967608 (100.00%)
CJE0110	slyD_6967609 (99.47%)	slyD_32261985 (45.16%)	slyD_2314277 (39.20%)	slyD_4155643 (38.64%)	SLYD_34482661 (39.15%)
CJE0111	fabD_6967610 (99.35%)	fabD_32262833 (48.43%)	fabD_2313169 (48.70%)	fabD_4154593 (48.70%)	WS0527_34482663 (49.67%)
CJE0112	pfs_6967611 (100.00%)	HH1283_32262834 (53.95%)	HP0089_2313168 (50.00%)	jhp0082_4154592 (50.43%)	PFS_34482664 (58.77%)
CJE0113	Cj0118_6967612 (99.60%)	HH1612_32263164 (52.26%)	HP1182_2314342 (49.38%)	jhp1108_4155705 (48.56%)	WS1792_34483814 (53.85%)
CJE0114	Cj0119_6967613 (100.00%)
CJE0115	Cj0120_6967614 (100.00%)	HH1240_32262790 (44.23%)	HP0951_2314100 (41.87%)	jhp0885_4155466 (41.38%)	WS0159_34482321 (40.69%)
CJE0116	Cj0121_6967615 (100.00%)		HP1160_2314318 (59.84%)	jhp1087_4155684 (60.47%)	WS0555_34482689 (60.48%)
CJE0117	Cj0122_6967616 (100.00%)
CJE0118	Cj0123c_6967617 (99.68%)	HH0817_32262366 (46.28%)	HP0727_2313849 (49.84%)	jhp0664_4155212 (50.16%)	WS0162_34482324 (46.53%)
CJE0119	Cj0124c_6967618 (100.00%)
CJE0120	Cj0125c_6967619 (99.17%)	dksA_32262786 (39.82%)			WS0155_34482317 (47.41%)
CJE0121	Cj0126c_6967620 (99.35%)	HH1237_32262787 (38.52%)	HP0949_2314088 (37.16%)	jhp0883_4155464 (35.81%)	WS0156_34482318 (40.91%)
CJE0122	accD_6967621 (100.00%)	accD_32262788 (66.55%)	accD_2314089 (65.49%)	accD_4155465 (65.85%)	ACCD_34482319 (69.42%)
CJE0123	Cj0128c_6967622 (100.00%)	suhB_32262789 (37.70%)			WS0158_34482320 (40.08%)
CJE0124	Cj0129c_6967623 (99.19%)	HH0992_32262542 (41.94%)			WS0350_34482498 (43.40%)
CJE0125	tyrA_6967624 (99.27%)	tyrA_32262543 (43.26%)	tyrA_2314550 (45.28%)	tyrA_4155901 (46.18%)	tyrA_34482497 (51.72%)
CJE0126	Cj0131_6967625 (99.78%)	HH1017_32262567 (36.02%)			WS2011_34484017 (40.35%)
CJE0127	lpxC_6967626 (99.32%)	lpxC_32262565 (58.33%)	envA_2314201 (54.24%)	lpxC_4154903 (55.25%)	envA_34484019 (62.03%)
CJE0128	Cj0133_6967627 (100.00%)
CJE0129	thrB_6967628 (99.66%)	thrB_32262563 (53.92%)	thrB_2314197 (51.74%)	thrB_4154901 (51.74%)	WS2015_34484021 (54.86%)
CJE0130	Cj0135_6967629 (100.00%)		HP1049_2314196 (41.77%)	jhp0376_4154900 (43.04%)
CJE0131	infB_6967630 (99.66%)	infB_32262561 (51.86%)	infB_2314195 (48.31%)	infB_4154899 (48.38%)	INFB_34484022 (53.44%)
CJE0132	Cj0137_6967631 (100.00%)	rbfA_32262389 (41.59%)	rbfA_2314194 (41.44%)	rbfA_4154898 (42.34%)	WS2017_34484023 (47.01%)
CJE0133	Cj0138_6967632 (100.00%)	HH0839_32262388 (36.49%)	HP1046_2314193 (38.93%)	jhp0379_4154909 (37.41%)	WS2018_34484024 (44.93%)
CJE0134	Cj0139_6967633 (58.14%)
CJE0135	Cj0140_6967634 (97.74%)
CJE0136	Cj0141c_6967635 (97.38%)	HH1758_32263310 (38.06%)			WS1315_34483393 (50.57%)
CJE0137	Cj0142c_6967636 (97.89%)	fecE_32263311 (40.17%)
CJE0138	Cj0143c_6967637 (98.99%)				WS1046_34483147 (37.64%)
CJE0139
CJE0140
CJE0141	Cj0145_6967639 (98.48%)
CJE0142	trxB_6967640 (98.08%)	trxB_1_32262034 (65.81%)	trxB_2313959 (64.19%)	trxB_1_4155329 (63.55%)	TRXB_34482596 (67.95%)
CJE0143	trxA_6967641 (99.04%)	trxA_2_32261602 (62.86%)	trxA_2313958 (69.52%)	trxA_4155328 (69.52%)	TRXA_34482594 (67.62%)
CJE0144	Cj0148c_6967642 (100.00%)	HH1751_32263303 (43.69%)	HP0823_2313953 (47.12%)	jhp0762_4155313 (47.12%)	WS0451_34482593 (36.89%)
CJE0145	hom_6967643 (100.00%)	hom_32263302 (54.10%)	metL_2313952 (53.35%)	hom_4155323 (52.87%)	HOM_34482592 (51.54%)
CJE0146	Cj0150c_6967644 (99.00%)	HH1749_32263301 (67.75%)			WS0449_34482591 (70.93%)
CJE0147	Cj0151c_6967645 (98.51%)
CJE0148	Cj0152c_6967646 (98.72%)
CJE0149	Cj0153c_6967647 (99.12%)	HH1746_32263298 (46.52%)	HP0553_2313669 (42.67%)	jhp0500_4155040 (42.41%)	WS0446_34482588 (46.67%)
CJE0150	Cj0154c_6967648 (99.64%)	HH1745_32263297 (38.95%)	HP0552_2313668 (42.25%)	jhp0499_4155039 (42.25%)	WS0445_34482587 (43.82%)
CJE0151	rpmE_6967649 (100.00%)	rpmE_32263296 (59.70%)	HP0551_2313667 (58.21%)	rpmE_4155038 (58.21%)	WS0444_34482586 (64.18%)
CJE0152	Cj0156c_6967650 (100.00%)	HH0994_32262544 (41.05%)	HP0374_2313478 (43.69%)	jhp1007_4155595 (42.34%)	WS2155_34484153 (38.12%)
CJE0153	Cj0157c_6967651 (100.00%)
CJE0154	Cj0158c_6967652 (98.58%)
CJE0155	Cj0159c_6967653 (100.00%)		HP0933_2314073 (35.83%)	jhp0867_4155434 (35.83%)
CJE0156	Cj0160c_6967654 (99.60%)		HP0934_2314068 (42.69%)	jhp0868_4155435 (42.29%)
CJE0157	moaA_6967655 (99.69%)	moaA_32262570 (47.75%)	moaA_2313896 (51.40%)	moaA_4155260 (50.47%)	MOAA_34484012 (52.02%)
CJE0158	Cj0162c_6967656 (100.00%)
CJE0159	Cj0163c_6967657 (99.39%)
CJE0160	ubiA_6967658 (99.66%)	ubiA_32263220 (54.23%)	ubiA_2314526 (51.23%)	ubiA_4155879 (51.23%)	UBIA_34482506 (49.65%)
CJE0161	miaA_6967659 (100.00%)	miaA_32262459 (37.23%)	miaA_2314590 (38.43%)	miaA_4155928 (39.84%)	miaA_34483983 (44.57%)
CJE0162	Cj0167c_6967660 (100.00%)				WS0973_34483077 (45.90%)
CJE0163	Cj0168c_6967661 (90.00%)
CJE0164	sodB_6967662 (100.00%)	sodF_32263384 (64.06%)	sodB_2313490 (61.57%)	sodF_4155578 (61.11%)	SODB_34483628 (55.76%)
CJE0165	Cj0172c_6967665 (99.00%)		HP1507_2314688 (63.25%)	jhp1400_4156021 (62.41%)	WS0167_34482329 (69.11%)
CJE0166	Cj0173c_6967666 (100.00%)
CJE0167	Cj0174c_6967667 (100.00%)
CJE0168	Cj0175c_6967668 (98.50%)
CJE0169
CJE0170	Cj0177_6967670 (98.59%)
CJE0171	Cj0178_6967671 (99.07%)
CJE0172	exbB1_6967672 (97.63%)
CJE0173	exbD1_6967673 (100.00%)
CJE0174	tonB1_6967674 (98.79%)
CJE0175	Cj0182_6967675 (99.25%)
CJE0176	Cj0183_6967676 (99.77%)	HH1872_32263424 (56.26%)	HP1490_2314662 (55.20%)	jhp1383_4155992 (55.20%)
CJE0177	Cj0184c_6967677 (98.70%)
CJE0178	Cj0185c_6967678 (97.10%)				WS1535_34483582 (77.27%)
CJE0179	Cj0186c_6967679 (98.74%)	HH1678_32263230 (56.62%)	HP1343_2314509 (49.56%)	jhp1262_4155863 (50.88%)
CJE0180	purN_6967680 (96.81%)	purN_32262018 (40.57%)			PURN_34483150 (53.80%)
CJE0181	Cj0188c_6967681 (99.56%)		HP1363_2314529 (35.97%)	jhp1281_4155896 (35.42%)	WS0953_34483057 (36.52%)
CJE0182	Cj0189c_6967682 (99.57%)
CJE0183	Cj0190c_6967683 (99.20%)	HH0570_32262118 (46.14%)	HP0792_2313921 (47.49%)	jhp0728_4155292 (47.49%)	WS2213_34481781 (44.18%)
CJE0184	def_6967684 (100.00%)	def_32262117 (56.63%)	HP0793_2313922 (55.56%)	def_4155293 (56.14%)	DEF_34481780 (58.79%)
CJE0185	clpP_6967685 (100.00%)	clpP_32262115 (78.76%)	clpP_2313923 (78.76%)	clpP_4155294 (78.76%)	CLPP_34481778 (86.01%)
CJE0186	tig_6967686 (100.00%)	tig_32262114 (40.32%)	HP0795_2313924 (41.95%)	tig_4155287 (41.27%)	TIG_34481777 (43.95%)
CJE0187	folE_6967687 (97.89%)	folE_32263264 (46.24%)	folE_2314065 (49.16%)	folE_2_4155441 (50.88%)	folE_34483308 (53.11%)
CJE0188	fliI_6967688 (99.78%)	fliI_32262113 (64.82%)	fliI_2314594 (63.91%)	fliI_4155920 (63.36%)	FLII_34484201 (69.68%)
CJE0189	purF_6967689 (99.78%)	purF_32262036 (58.22%)			PURF_34482598 (56.79%)
CJE0190	dapB_6967690 (99.17%)	dapB_32262035 (56.47%)	dapB_2313620 (46.67%)	dapB_4155000 (45.50%)	dapB_34482597 (57.03%)
CJE0191	Cj0198c_6967691 (98.98%)	HH1640_32263192 (50.37%)	HP1026_2314168 (49.87%)	jhp0398_4154931 (48.86%)	WS1256_34483337 (58.77%)
CJE0192	Cj0199c_6967692 (97.07%)
CJE0193	Cj0200c_6967693 (99.13%)
CJE0194	Cj0201c_6967694 (98.42%)
CJE0195	Cj0202c_6967695 (97.20%)
CJE0197	Cj0204_6967697 (99.70%)
CJE0198	bacA_6967698 (99.25%)				BACA_34483370 (61.42%)
CJE0199	thrS_6967699 (99.34%)	thrS_32261990 (64.95%)	thrS_2313207 (64.22%)	thrS_4154621 (63.89%)	THRS_34482934 (69.78%)
CJE0200	infC_6967700 (100.00%)	infC_32261991 (68.42%)	infC_2313208 (65.29%)	infC_4154622 (65.29%)	INFC_34482935 (72.51%)
CJE0201	Cj0208_6967701 (90.08%)
CJE0202
CJE0203
CJE0204
CJE0205
CJE0206
CJE0207
CJE0208
CJE0209
CJE0210
CJE0211
CJE0212
CJE0213
CJE0214
CJE0215					hemH_34482457 (36.70%)
CJE0216
CJE0217
CJE0218
CJE0219
CJE0220
CJE0221
CJE0222
CJE0223
CJE0224
CJE0225
CJE0226
CJE0227
CJE0228
CJE0229
CJE0230
CJE0231
CJE0232
CJE0233
CJE0234
CJE0235
CJE0236
CJE0237
CJE0238
CJE0239
CJE0240
CJE0241
CJE0242
CJE0243
CJE0244
CJE0245
CJE0246
CJE0247
CJE0248
CJE0249
CJE0250
CJE0251
CJE0252
CJE0253
CJE0254
CJE0255
CJE0256
CJE0257
CJE0258
CJE0259
CJE0260
CJE0261
CJE0262
CJE0263
CJE0264
CJE0265		HH0754_32262303 (59.24%)
CJE0266
CJE0267
CJE0268
CJE0269		HH0752_32262301 (38.56%)
CJE0270
CJE0271
CJE0272
CJE0273
CJE0275	argC_6967702 (99.12%)	argC_32262218 (42.28%)			ARGC_34484089 (40.23%)
CJE0276	Cj0225_6967703 (99.32%)
CJE0277	argB_6967704 (99.28%)	argB_32261726 (45.39%)			ARGB_34484139 (42.91%)
CJE0278	argD_6967705 (98.98%)	argD_32262519 (36.36%)			argD_34482452 (38.99%)
CJE0279	pcm_6967706 (100.00%)	pcm_32262152 (54.85%)	HP0363_2313465 (53.77%)	pcm_4155612 (53.77%)	WS0418_34482562 (51.76%)
CJE0280	Cj0229_6967707 (98.90%)				WS1948_34483958 (53.11%)
CJE0281	Cj0230c_6967708 (98.90%)
CJE0282	nrdB_6967709 (99.12%)	nrdB_32262154 (62.94%)	nrdB_2313466 (58.53%)	nrdB_4155613 (58.53%)	NRDB_34482564 (64.18%)
CJE0283	Cj0232c_6967710 (98.53%)		HP1258_2314425 (37.10%)		WS0316_34482466 (41.73%)
CJE0284	pyrE_6967711 (98.51%)	pyrE_32262906 (58.62%)	pyrE_2314424 (59.80%)	pyrE_4155788 (60.29%)	PYRE_34482465 (64.85%)
CJE0285	frr_6967712 (98.38%)	frr_32261989 (64.86%)	HP1256_2314423 (65.41%)	frr_4155787 (64.86%)	FRR_34482464 (65.76%)
CJE0286	secG_6967713 (99.19%)	secG_32261988 (52.76%)			SECG_34482463 (56.60%)
CJE0287	Cj0236c_6967714 (100.00%)	HH0912_32262461 (45.85%)	HP0920_2314055 (49.15%)	jhp0854_4155429 (48.72%)	WS0346_34482495 (51.71%)
CJE0288	cynT_6967715 (99.53%)	icfA_32261587 (54.42%)	icfA_2313081 (43.50%)	icfA_4154507 (43.13%)	CYNT_34482443 (58.94%)
CJE0289	Cj0238_6967716 (99.52%)		HP0415_2313519 (36.51%)	jhp0969_4155556 (36.18%)	WS0996_34483100 (39.01%)
CJE0290	Cj0239c_6967717 (100.00%)	yurV_32262111 (68.81%)	HP0221_2313312 (68.81%)	jhp0207_4154728 (68.50%)	WS2205_34484199 (67.89%)
CJE0291	Cj0240c_6967718 (98.98%)	nifS_32262112 (63.54%)	nifS_2313311 (62.76%)	jhp0206_4154727 (63.02%)	WS2206_34484200 (63.64%)
CJE0293	Cj0243c_6967720 (99.23%)
CJE0294	rpmI_6967721 (98.41%)		HP0125_2313210 (60.66%)	rpmI_4154623 (60.66%)	WS0822_34482936 (59.02%)
CJE0295	rplT_6967722 (100.00%)	rplT_32261993 (75.65%)	HP0126_2313209 (74.78%)	rplT_4154635 (74.78%)	WS0823_34482937 (81.20%)
CJE0296
CJE0298	Cj0248_6967725 (99.65%)	HH0973_32262523 (55.67%)
CJE0299	Cj0249_6967726 (99.37%)
CJE0300	Cj0250c_6967727 (99.31%)		proP_2314076 (51.35%)
CJE0301	Cj0251c_6967728 (96.08%)
CJE0302	moaC_6967729 (97.45%)	moaC_32261599 (68.59%)	moaC_2313930 (65.58%)	moaC_4155304 (64.29%)	MOAC_34483286 (65.58%)
CJE0303	Cj0253_6967730 (98.85%)	HH0885_32262434 (36.47%)			WS1260_34483341 (35.44%)
CJE0304	Cj0254_6967731 (100.00%)
CJE0305	Cj0255c_6967732 (100.00%)	lexA_32262477 (43.48%)	lexA_2314703 (41.50%)	exoA_4156036 (40.47%)
CJE0306	Cj0256_6967733 (98.05%)	HH0805_32262354 (50.10%)			WS0643_34482774 (43.92%)
CJE0307	dgkA_6967734 (99.15%)	dgkA_32261767 (38.68%)	dgkA_2313825 (37.74%)	dgkA_4155193 (36.19%)	DGKA_34482773 (42.98%)
CJE0308	Cj0258_6967735 (96.00%)
CJE0309	pyrC_6967736 (78.68%)	pyrC_2_32262162 (42.69%)	pyrC_2313687 (42.39%)	pyrC_2_4155058 (44.01%)	PYRC_34484008 (43.50%)
CJE0310
CJE0311	Cj0261c_6967738 (78.90%)
CJE0312	Cj0262c_6967739 (77.74%)	HH1088_32262638 (43.68%)			WS1333_34483409 (39.89%)
CJE0313	Cj0263_6967740 (98.96%)
CJE0314	Cj0144_6967638 (98.79%)	HH0971_32262521 (40.59%)
CJE0315	Cj0266c_6967743 (98.82%)
CJE0316	Cj0267c_6967744 (98.82%)
CJE0317	Cj0268c_6967745 (98.62%)	HH0450_32261998 (44.17%)	HP0248_2313341 (56.47%)	jhp0233_4154759 (56.75%)	WS0091_34482258 (58.26%)
CJE0318	ilvE_6967746 (99.67%)	ilvE_32261999 (64.71%)			ILVE_34482259 (69.46%)
CJE0319	Cj0270_6967747 (97.06%)		dmpI_2314069 (37.31%)	jhp0858_4155428 (35.82%)	WS1461_34483522 (40.30%)
CJE0320	Cj0271_6967748 (98.01%)	bcp_32262560 (57.62%)	HP0136_2313221 (57.05%)	bcp_4154631 (57.05%)	BCP_34482355 (57.93%)
CJE0321	Cj0272_6967749 (99.17%)	HH1180_32262730 (39.36%)	HP0100_2313180 (39.31%)	jhp0092_4154600 (39.60%)	WS0061_34482229 (37.25%)
CJE0322	fabZ_6967750 (100.00%)	fabZ_32262731 (52.60%)	fabZ_2314546 (56.85%)	fabZ_4155894 (56.85%)	fabZ_34482228 (58.78%)
CJE0323	lpxA_6967751 (99.24%)	lpxA_32262732 (48.25%)	lpxA_2314545 (42.19%)	lpxA_4155893 (42.58%)	lpxA_34482227 (48.30%)
CJE0324	clpX_6967752 (99.26%)	clpX_32262733 (64.18%)	clpX_2314544 (66.76%)	clpX_4155892 (66.48%)	CLPX_34482226 (66.10%)
CJE0325	mreB_6967753 (99.42%)	mreB_32262734 (76.90%)	mreB_2314543 (70.85%)	mreB_4155891 (70.85%)	MREB_34482225 (81.16%)
CJE0326	Cj0277_6967754 (99.60%)				WS0056_34482224 (36.51%)
CJE0327	carB_6967755 (98.99%)	carB_32263240 (71.69%)	HP0919_2314054 (62.64%)	carB_4155424 (62.73%)	CARB_34484145 (68.72%)
CJE0328	Cj0280_6967756 (100.00%)	HH1703_32263255 (46.48%)	HP0918_2314058 (52.11%)	jhp0852_4155423 (54.23%)	WS2146_34484144 (46.10%)
CJE0329	tal_6967757 (100.00%)	tal_32262690 (41.26%)	HP1495_2314674 (44.28%)	tal_4156008 (44.28%)	WS2080_34484083 (48.34%)
CJE0330	serB_6967758 (100.00%)		serB_2313770 (49.27%)	serB_4155140 (50.73%)	SERB_34484084 (53.20%)
CJE0331	cheW_6967759 (100.00%)	cheW_32262222 (46.24%)	cheW_2313492 (51.45%)	cheW_4155569 (47.98%)	WS2082_34484085 (54.44%)
CJE0332	cheA_6967760 (99.74%)	cheA_32262221 (67.26%)	cheA_2313493 (66.77%)	cheA_4155570 (63.81%)
CJE0333	cheV_6967761 (100.00%)	HH0671_32262220 (49.36%)	cheV_2313494 (51.66%)	cheV_3_4155571 (51.82%)	CHEV_34484087 (64.08%)
CJE0334	Cj0286c_6967762 (98.54%)
CJE0335	greA_6967763 (100.00%)	greA_32261701 (63.35%)	greA_2313994 (57.76%)	greA_4155364 (57.76%)	GREA_34482913 (53.42%)
CJE0336	lpxB_6967764 (97.25%)	lpxB_32262359 (42.34%)	lpxB_2313995 (43.95%)	lpxB_4155351 (43.62%)	lpxB_34482912 (46.03%)
CJE0337	peb3_6967765 (99.60%)
CJE0339	surE_6967767 (100.00%)	surE_32261883 (52.45%)	surE_2314067 (46.01%)	surE_4155443 (46.01%)	SURE_34483708 (48.85%)
CJE0340	Cj0294_6967768 (94.91%)	HH0336_32261884 (48.60%)	moeB_2313882 (48.02%)	jhp0692_4155246 (47.20%)	WS1677_34483707 (53.49%)
CJE0341	panD_6967770 (98.41%)		panD_2313109 (51.35%)	panD_4154535 (52.25%)	panD_34483712 (50.43%)
CJE0342	panC_6967771 (95.04%)	panC_32261582 (41.70%)	panC_2313083 (40.64%)	panC_4154509 (41.70%)	WS0112_34482277 (41.79%)
CJE0343	panB_6967772 (97.81%)	panB_32262055 (43.35%)	panB_2314202 (44.70%)	panB_4154887 (44.70%)	WS1826_34483844 (47.35%)
CJE0344	Cj0299_6967773 (99.60%)
CJE0345	modC_6967774 (79.93%)	modC_32262206 (46.48%)		modC_4154952 (47.37%)	MODC_34483823 (47.95%)
CJE0346	modB_6967775 (85.07%)	modB_32262205 (60.65%)	modB_2313585 (58.90%)	modB_4154951 (58.90%)	MODB_34483824 (59.45%)
CJE0347	Cj0302c_6967776 (64.62%)				WS1805_34483825 (35.66%)
CJE0348	modA_6967777 (80.40%)		modA_2313584 (38.08%)	modA_4154950 (36.97%)	MODA_34483829 (50.60%)
CJE0349	bioC_6967778 (75.44%)	bioC_32262757 (38.14%)
CJE0350	Cj0305c_6967779 (69.46%)	HH1208_32262758 (38.60%)
CJE0351	bioF_6967780 (75.79%)	bioF_32262759 (51.57%)
CJE0352	bioA_6967781 (98.13%)	bioA_32262760 (64.58%)	bioA_2314118 (58.14%)	bioA_4155491 (59.40%)	BIOA_34482390 (61.83%)
CJE0353	bioD_6967782 (100.00%)	bioD_32262761 (48.92%)
CJE0354	Cj0309c_6967783 (95.19%)	HH1452_32263003 (54.81%)
CJE0355	Cj0310c_6967784 (99.11%)
CJE0356	Cj0311_6967785 (100.00%)	rplY_32263045 (61.80%)	HP1496_2314675 (56.74%)	rplY_4156009 (57.87%)	WS2079_34484082 (61.80%)
CJE0357	pth_6967786 (98.90%)		HP1497_2314676 (46.11%)	pth_4156010 (46.11%)	PTH_34484081 (52.43%)
CJE0358	Cj0313_6967787 (98.58%)		HP1498_2314682 (36.02%)	jhp1391_4156011 (35.45%)
CJE0359	lysA_6967788 (98.01%)	lysA_32263058 (58.02%)	lysA_2313384 (60.20%)	lysA_4154810 (60.71%)	lysA_34482482 (61.38%)
CJE0360	Cj0315_6967789 (97.25%)
CJE0361	pheA_6967790 (99.16%)	pheA_32263059 (50.71%)			PHEA_34482481 (56.90%)
CJE0362	hisC_6967791 (96.43%)	hisC_32262160 (52.09%)			HISC_34484006 (52.09%)
CJE0363	fliF_6967792 (99.82%)	fliF_32262159 (40.70%)	fliF_2313452 (43.84%)	fliF_4154846 (44.39%)	FLIF_34484005 (47.97%)
CJE0364	fliG_6967793 (100.00%)	fliG_32262158 (65.59%)	fliG_2313453 (61.47%)	fliG_4154847 (61.47%)	FLIG_34484004 (68.04%)
CJE0365	fliH_6967794 (98.55%)	fliH_32262157 (36.73%)	fliH_2313454 (37.45%)	fliH_4154848 (38.11%)	FLIH_34484003 (35.53%)
CJE0366	dxs_6967795 (99.35%)	dxs_32262156 (57.73%)	HP0354_2313455 (57.33%)	dxs_4154849 (57.50%)	WS1996_34484002 (60.26%)
CJE0367	perR_6967796 (98.53%)				PERR_34482680 (40.00%)
CJE0368	Cj0323_6967797 (98.99%)
CJE0369	ubiE_6967798 (98.72%)	ubiE_32263271 (48.13%)	HP1483_2314655 (51.05%)	ubiE_4155985 (51.05%)	UBIE_34483303 (57.69%)
CJE0370	xseA_6967799 (99.48%)	xseA_32263284 (40.00%)			WS0566_34482700 (39.04%)
CJE0371	serC_6967800 (98.32%)
CJE0372	Cj0327_6967801 (98.28%)
CJE0373	fabH_6967802 (98.77%)	fabH_32262230 (59.33%)	fabH_2313291 (60.12%)	fabH_4154707 (60.12%)	WS1988_34483995 (60.24%)
CJE0374	plsX_6967803 (98.17%)	plsX_32262229 (52.22%)	plsX_2313290 (53.80%)	plsX_4154706 (53.65%)	PLSX_34483996 (55.31%)
CJE0375	rpmF_6967804 (100.00%)	rpmF_32262228 (75.00%)	HP0200_2313293 (72.92%)	rpmF_4154693 (70.83%)
CJE0376	Cj0331c_6967805 (99.15%)
CJE0377	ndk_6967806 (98.54%)	ndk_32262226 (83.21%)	HP0198_2313289 (74.07%)	ndk_4154691 (74.63%)	WS1991_34483998 (79.41%)
CJE0378	fdxA_6967807 (97.87%)	fdxA_32262195 (79.79%)
CJE0379	ahpC_6967808 (100.00%)	tsaA_32263095 (70.71%)	tsaA_2314747 (67.68%)	tsaA_4156103 (67.17%)	AHPC_34484001 (79.29%)
CJE0380	flhB_6967809 (100.00%)	flhB_1_32262568 (44.06%)	flhB_2313898 (39.77%)	flhB_1_4155273 (39.77%)	FLHB_34484015 (46.84%)
CJE0381	motB_6967810 (99.60%)	motB_32262050 (45.71%)	motB_2313948 (43.32%)	motB_4155316 (43.32%)
CJE0382	motA_6967811 (100.00%)	motA_32262049 (54.69%)	motA_2313947 (58.59%)	motA_4155315 (58.59%)
CJE0383	polA_6967812 (98.29%)		polA_2314647 (39.91%)	polA_4155975 (38.61%)	POLA_34482572 (43.54%)
CJE0384	Cj0339_6967813 (99.34%)
CJE0385	Cj0340_6967814 (97.91%)
CJE0386	Cj0341c_6967815 (98.64%)	HH0177_32261724 (47.79%)
CJE0387
CJE0388
CJE0389
CJE0390	uvrA_6967816 (99.15%)	uvrA_32261679 (68.99%)	uvrA_2313828 (68.59%)	uvrA_4155197 (68.16%)	UVRA_34483662 (69.43%)
CJE0391	Cj0343c_6967818 (99.23%)	HH1252_32262803 (51.57%)	HP0677_2313804 (45.28%)	jhp0619_4155164 (46.77%)	WS1626_34483661 (45.85%)
CJE0392
CJE0393
CJE0394	trpE_6967820 (98.80%)
CJE0395	trpD_6967821 (99.62%)	trpD_32261862 (35.01%)
CJE0396	trpF_6967822 (100.00%)
CJE0397	trpB_6967823 (100.00%)	trpB_32262966 (51.55%)	trpB_2314445 (56.44%)	trpB_4155803 (55.41%)	WS1351_34483424 (56.20%)
CJE0398	trpA_6967824 (100.00%)				TRPA_34483845 (37.79%)
CJE0399	Cj0350_6967825 (100.00%)
CJE0400	fliN_6967826 (100.00%)	fliN_32263128 (56.18%)			FLIN_34483157 (60.67%)
CJE0401	Cj0352_6967827 (97.74%)
CJE0402	Cj0353c_6967828 (99.59%)	ppx_32262534 (40.66%)	gppA_2313368 (41.03%)	gppA_4154784 (41.03%)	WS1910_34483923 (44.44%)
CJE0403	fdxB_6967829 (100.00%)	fdxB_32262535 (60.00%)	HP0277_2313367 (58.44%)	jhp0262_4154783 (58.44%)	WS1911_34483924 (65.33%)
CJE0404	Cj0355c_6967830 (99.10%)	HH1697_32263249 (73.42%)	HP1043_2314190 (59.46%)	jhp0381_4154918 (59.91%)	WS0306_34482456 (77.83%)
CJE0405	Cj0356c_6967831 (99.05%)
CJE0406	Cj0357c_6967832 (99.50%)	HH0923_32262472 (46.67%)	HP1509_2314690 (40.19%)	jhp1402_4156023 (40.19%)	WS0004_34482177 (49.25%)
CJE0407	Cj0358_6967833 (99.41%)	yhjA_32262867 (62.39%)	HP1461_2314639 (58.45%)	jhp1354_4155966 (58.45%)	WS1491_34483546 (65.12%)
CJE0408
CJE0409	Cj0360_6967834 (99.33%)	glmM_2_32263331 (60.36%)	ureC_2313156 (63.72%)	glmM_4154579 (63.51%)	WS0818_34482932 (63.90%)
CJE0410	lspA_6967835 (100.00%)	lspA_32263332 (47.65%)	lspA_2313155 (52.94%)	lspA_4154578 (51.68%)	LSPA_34482933 (53.52%)
CJE0411	Cj0362_6967836 (100.00%)	HH1717_32263269 (45.83%)	HP1484_2314656 (47.62%)	jhp1377_4155986 (49.32%)	WS1216_34483299 (54.17%)
CJE0412	Cj0363c_6967837 (99.10%)				WS0113_34482278 (42.86%)
CJE0413	Cj0364_6967838 (100.00%)
CJE0414	Cj0365c_6967839 (99.19%)
CJE0415	Cj0366c_6967840 (99.23%)	HH0174_32261721 (51.92%)			WS0770_34482886 (54.56%)
CJE0416	Cj0367c_6967841 (99.73%)				WS0768_34482885 (36.68%)
CJE0417	Cj0368c_6967842 (99.05%)
CJE0418	Cj0369c_6967843 (100.00%)	HH0913_32262462 (49.89%)	HP1508_2314689 (46.58%)	jhp1401_4156022 (46.14%)	WS0634_34482765 (54.41%)
CJE0419	rpsU_6967844 (100.00%)	rpsU_32262326 (84.29%)	HP0562_2313679 (81.43%)	rpsU_4155048 (80.00%)	WS0632_34482763 (84.29%)
CJE0420	Cj0371_6967845 (100.00%)	HH0014_32261561 (53.81%)	HP0232_2313324 (46.45%)	jhp0217_4154743 (46.92%)	WS0575_34482709 (49.53%)
CJE0421	Cj0372_6967846 (100.00%)	ygiC_32261562 (57.95%)	HP0233_2313325 (60.47%)	jhp0218_4154744 (60.21%)	WS0574_34482708 (57.95%)
CJE0422	Cj0373_6967847 (99.68%)	HH0178_32261725 (48.21%)	HP0096_2313177 (45.66%)	jhp0088_4154596 (44.69%)	WS2143_34484142 (50.65%)
CJE0423	Cj0374_6967848 (98.16%)				WS0081_34482249 (44.85%)
CJE0424	Cj0375_6967849 (97.47%)
CJE0425	Cj0376_6967850 (98.54%)
CJE0426	Cj0377_6967851 (98.95%)	HH0474_32262022 (48.14%)			WS1660_34483693 (49.66%)
CJE0427	Cj0378c_6967852 (98.31%)
CJE0428	Cj0379c_6967853 (99.33%)				WS1748_34483773 (58.55%)
CJE0429	Cj0380c_6967854 (98.47%)
CJE0430	pyrF_6967855 (98.92%)	pyrF_32261583 (51.97%)	pyrF_2313082 (53.57%)	pyrF_4154508 (54.02%)	pyrF_34482447 (54.63%)
CJE0431	nusB_6967856 (100.00%)	nusB_32261584 (46.21%)	HP0001_2313078 (50.00%)	nusB_4154504 (50.00%)	NUSB_34482446 (47.66%)
CJE0432	ribH_6967857 (100.00%)	ribH_32261585 (68.18%)	ribE_2313079 (67.53%)	ribE_4154505 (70.13%)	RIBH_34482445 (70.13%)
CJE0433	kdsA_6967858 (100.00%)	kdsA_32261586 (64.26%)	kdsA_2313080 (63.16%)	kdsA_4154506 (63.53%)	KDSA_34482444 (63.88%)
CJE0434	Cj0385c_6967859 (99.68%)
CJE0435	Cj0386_6967860 (100.00%)	yphC_32263090 (48.73%)	yphC_2313967 (51.85%)	jhp0773_4155327 (51.20%)	WS2040_34484044 (52.04%)
CJE0436	aroK_6967861 (99.39%)	aroK_32262176 (43.75%)	aroK_2313237 (41.25%)	aroK_4154658 (40.62%)	AROK_34483552 (40.62%)
CJE0437	trpS_6967862 (100.00%)		trpS_2314417 (38.04%)	trpS_4155771 (37.12%)	WS0311_34482461 (38.58%)
CJE0438	serS_6967863 (99.51%)	serS_32263041 (59.00%)	serS_2314654 (56.01%)	serS_4155982 (56.49%)	SERS_34482982 (56.85%)
CJE0439	Cj0390_6967864 (99.39%)				WS0873_34482983 (36.54%)
CJE0440	Cj0391c_6967865 (98.58%)				WS1599_34483638 (41.52%)
CJE0441	pyk_6967866 (99.17%)
CJE0442	Cj0393c_6967867 (99.33%)		HP0086_2313166 (50.22%)	jhp0079_4154589 (49.78%)
CJE0443	Cj0394c_6967868 (99.04%)	HH0150_32261697 (43.63%)	HP0862_2314002 (38.73%)	jhp0796_4155360 (37.75%)	WS0803_34482917 (48.29%)
CJE0444	Cj0395c_6967869 (97.92%)
CJE0445	Cj0396c_6967870 (98.49%)
CJE0446	Cj0397c_6967871 (97.92%)
CJE0447	gatC_6967872 (100.00%)	gatC_32262798 (46.32%)	gatC_2314117 (39.58%)	gatC_4155490 (40.62%)	gatC_34482692 (45.83%)
CJE0448	Cj0399_6967873 (98.40%)				WS0083_34482250 (38.60%)
CJE0449	fur_6967874 (99.36%)	fur_32262442 (43.57%)	HP1027_2314174 (40.85%)	fur_4154920 (42.03%)	FUR_34484047 (42.76%)
CJE0450	lysS_6967875 (99.20%)	lysS_32263218 (55.49%)	lysS_2313270 (58.37%)	lysS_4154685 (58.47%)	lysS_34482251 (63.76%)
CJE0451	glyA_6967876 (99.28%)	glyA_32263217 (70.70%)	glyA_2313271 (68.93%)	glyA_4154686 (68.69%)	GLYA3_34482252 (70.22%)
CJE0452	Cj0403_6967877 (100.00%)	HH1664_32263216 (59.12%)	HP0184_2313273 (57.78%)	jhp0172_4154687 (56.67%)	WS0086_34482253 (59.67%)
CJE0453	Cj0404_6967878 (96.04%)
CJE0454	aroE_6967879 (99.62%)	aroE_32262797 (46.12%)	aroE_2314414 (41.22%)	aroE_4155767 (41.43%)	AROE_34484164 (40.23%)
CJE0455	Cj0406c_6967880 (99.00%)
CJE0456	lgt_6967881 (99.63%)	lgt_32262058 (52.75%)	HP0955_2314092 (52.48%)	lgt_4155470 (52.84%)	LGT_34484113 (62.07%)
CJE0457	frdC_6967882 (100.00%)	frdC_32262234 (47.68%)	frdC_2313280 (50.00%)	frdC_4154698 (50.41%)	FRDC_34482944 (53.65%)
CJE0458	frdA_6967883 (99.85%)	frdA_32262235 (68.33%)			FRDA_34482943 (69.55%)
CJE0459	frdB_6967884 (100.00%)	frdB_32262236 (70.21%)	frdB_2313278 (65.81%)	frdB_4154696 (66.24%)	FRDB_34482942 (68.35%)
CJE0460	Cj0411_6967885 (97.94%)
CJE0461	Cj0412_6967886 (97.19%)
CJE0462	Cj0413_6967887 (96.15%)
CJE0463	Cj0414_6967888 (98.76%)
CJE0464	Cj0415_6967889 (99.48%)
CJE0465
CJE0466
CJE0467	Cj0418c_6967892 (98.29%)
CJE0468	Cj0419_6967893 (99.17%)
CJE0469	Cj0420_6967894 (100.00%)	HH1002_32262552 (36.96%)	HP1286_2314454 (37.77%)	jhp1206_4155810 (36.70%)	WS2216_34481783 (39.38%)
CJE0470	Cj0421c_6967895 (98.11%)
CJE0471	Cj0422c_6967896 (98.55%)				WS1455_34483517 (47.62%)
CJE0472
CJE0473
CJE0474
CJE0475	Cj0426_6967900 (98.86%)	HH0914_32262463 (62.55%)	yheS_2313986 (60.49%)	jhp0789_4155369 (60.30%)	WS2214_34481782 (62.34%)
CJE0476	Cj0427_6967901 (100.00%)
CJE0477	Cj0428_6967902 (96.06%)
CJE0478	Cj0429c_6967903 (98.97%)		HP1485_2314657 (39.13%)	jhp1378_4155987 (38.59%)	WS1215_34483298 (48.33%)
CJE0479
CJE0480	Cj0430_6967904 (98.77%)				WS0133_34482296 (38.25%)
CJE0481	Cj0431_6967905 (99.02%)
CJE0482	murD_6967906 (96.77%)	murD_32262717 (48.20%)	murD_2313605 (43.97%)	murD_4154982 (43.97%)	MURD_34484041 (55.05%)
CJE0483	mraY_6967907 (99.43%)	mraY_32262718 (55.12%)	mraY_2313604 (55.56%)	mraY_4154981 (55.13%)	MRAY_34484042 (56.66%)
CJE0484	pgm_6967908 (98.98%)	pgm_32262719 (56.62%)	HP0974_2314116 (55.67%)	pgm_4155489 (54.97%)	PGM_34484043 (55.26%)
CJE0485	fabG_6967909 (99.19%)	fabG_32262281 (71.66%)	fabG_2313678 (69.64%)	fabG_4155047 (68.83%)	FABG_34482762 (70.85%)
CJE0486	Cj0436_6967910 (99.26%)	HH1817_32263369 (39.50%)
CJE0487
CJE0488	sdhA_6967911 (99.48%)				SDHA_34483933 (65.73%)
CJE0489	sdhB_6967912 (99.38%)				SDHB_34483934 (71.65%)
CJE0490	sdhC_6967913 (98.95%)				sdhC_34483935 (70.07%)
CJE0491	Cj0440c_6967914 (100.00%)
CJE0492
CJE0493	acpP_6967915 (98.70%)	HH0728_32262277 (71.23%)	acpP_2313677 (61.84%)	acpP_4155045 (61.84%)	ACPP_34482761 (67.11%)
CJE0494	fabF_6967916 (99.50%)	fabF_32262276 (66.02%)	fabF_2313676 (64.32%)	fabB_4155044 (64.56%)	FABB_34482760 (65.94%)
CJE0495	accA_6967917 (99.36%)	accA_32262275 (66.67%)	accA_2313675 (61.86%)	accA_4155056 (62.18%)	ACCA_34482759 (64.74%)
CJE0497	Cj0447_6967918 (99.49%)	HH0871_32262420 (41.24%)	HP0507_2313618 (46.20%)	jhp0457_4154997 (45.16%)	WS0265_34482418 (40.33%)
CJE0498	Cj0448c_6967919 (100.00%)				WS0128_34482291 (39.82%)
CJE0499	Cj0449c_6967920 (100.00%)	HH1292_32262843 (52.11%)	HP1242_2314405 (45.07%)	jhp1163_4155772 (46.48%)	WS0331_34482480 (50.70%)
CJE0500	rpmB_6967921 (100.00%)	rpmB_32262840 (73.33%)	HP0491_2313612 (63.33%)	rpmB_4154978 (63.33%)	rpmB_34482477 (80.65%)
CJE0501	rep_6967922 (98.60%)	rpe_32262897 (53.81%)	HP1386_2314553 (55.66%)	rpe_4156059 (55.19%)	REP_34482376 (53.99%)
CJE0502	dnaQ_6967923 (96.52%)	dnaQ_32262898 (40.09%)			WS0221_34482378 (44.61%)
CJE0503	thiC_6967924 (99.30%)	thiC_32263132 (50.00%)			thiC_34483951 (49.53%)
CJE0504	Cj0454c_6967925 (98.84%)
CJE0505		HH1277_32262828 (36.87%)			WS1772_34483797 (36.31%)
CJE0506	Cj0456c_6967927 (97.18%)
CJE0507	Cj0457c_6967928 (100.00%)				WS1775_34483800 (44.39%)
CJE0508	Cj0458c_6967929 (98.85%)	HH1274_32262825 (56.49%)	HP0269_2313364 (60.43%)	jhp0254_4154788 (59.95%)	WS1776_34483801 (61.40%)
CJE0509	Cj0459c_6967930 (100.00%)	HH1273_32262824 (41.86%)			WS1777_34483802 (58.75%)
CJE0510	nusA_6967931 (99.72%)	nusA_32262823 (49.33%)	nusA_2314694 (49.21%)	nusA_4156020 (48.89%)	NUSA_34483803 (57.49%)
CJE0511	Cj0461c_6967932 (98.99%)				WS0942_34483047 (36.48%)
CJE0512	Cj0462_6967933 (99.14%)	HH0991_32262541 (72.41%)	HP0656_2313781 (65.90%)	jhp0601_4155153 (65.61%)	WS0351_34482499 (70.23%)
CJE0513	Cj0463_6967934 (98.03%)	HH0990_32262540 (38.37%)	ymxG_2313782 (38.69%)	jhp0602_4155154 (38.44%)	WS0352_34482501 (43.92%)
CJE0514	recG_6967935 (97.36%)	recG_32262706 (44.04%)	recG_2314702 (42.37%)	recG_4156031 (41.88%)	RECG_34482502 (46.03%)
CJE0515	Cj0465c_6967936 (97.64%)	HH0164_32261711 (68.22%)
CJE0516	Cj0466_6967937 (95.96%)				WS1193_34483279 (38.78%)
CJE0517	Cj0467_6967938 (99.14%)		glnP_2314328 (38.68%)	jhp1096_4155694 (39.15%)
CJE0518	Cj0468_6967939 (100.00%)	HH0346_32261894 (51.74%)	glnP_2314329 (49.30%)	jhp1097_4155695 (50.23%)
CJE0519	Cj0469_6967940 (99.18%)	glnQ_1_32261895 (64.73%)	glnQ_2314330 (61.41%)	jhp1098_4155696 (61.57%)
CJE0520	tuf_6967941 (100.00%)	tufA_32261917 (85.46%)	tufB_2314366 (84.21%)	tufA_4155731 (83.46%)
CJE0521	rpmG_6967942 (100.00%)	rpmG_32261916 (80.00%)	HP1204_2314371 (73.08%)	rpmG_4155730 (73.08%)
CJE0522	secE_6967943 (100.00%)	secE_32261915 (55.17%)			WS0461_34482601 (64.41%)
CJE0523	nusG_6967944 (100.00%)	nusG_32261914 (68.79%)	nusG_2314365 (69.94%)	nusG_4155723 (70.52%)	NUSG_34482602 (76.74%)
CJE0524	rplK_6967945 (100.00%)	rplK_32261913 (75.89%)	HP1202_2314364 (77.30%)	rplK_4155722 (77.30%)	RPLK_34482603 (76.60%)
CJE0525	rplA_6967946 (100.00%)	rplA_32261912 (68.83%)	rpl1_2314363 (68.40%)	rplA_4155721 (67.97%)	RPLA_34482604 (68.83%)
CJE0526	rplJ_6967947 (99.37%)	rplJ_32261911 (45.57%)	HP1200_2314362 (46.15%)	rplJ_4155720 (46.79%)	RPLJ_34482605 (50.00%)
CJE0527	rplL_6967948 (97.60%)	rplL_32261910 (75.40%)	HP1199_2314361 (72.80%)	rplL_4155719 (73.60%)	WS0466_34482606 (72.80%)
CJE0528	rpoB_6967949 (99.93%)
CJE0529	rpoC_6967950 (99.93%)
CJE0530	Cj0480c_6967951 (99.60%)
CJE0531
CJE0532	Cj0481_6967952 (99.34%)
CJE0534	Cj0484_6967955 (99.76%)
CJE0535	Cj0485_6967956 (99.62%)
CJE0536	Cj0486_6967957 (99.52%)
CJE0537	Cj0487_6967958 (100.00%)
CJE0538	Cj0488_6967959 (98.10%)
CJE0539	ald'_6967961 (99.49%)
CJE0540	rpsL_6967962 (100.00%)	rpsL_32261908 (87.50%)	HP1197_2314356 (90.32%)	rpsL_4155709 (90.32%)	WS0468_34482608 (90.55%)
CJE0541	rpsG_6967963 (100.00%)	rpsG_32261907 (71.15%)	rps7_2314355 (69.87%)	rpsG_4155708 (69.87%)	rps7_34482609 (68.59%)
CJE0542	fusA_6967964 (100.00%)	fusA_32261906 (79.62%)	fusA_2314354 (80.35%)	fusA_4155707 (79.91%)	EFG_34482610 (78.79%)
CJE0544
CJE0545
CJE0546
CJE0547
CJE0548
CJE0549
CJE0550
CJE0551
CJE0552
CJE0553
CJE0554
CJE0555
CJE0556
CJE0557
CJE0558
CJE0559
CJE0560
CJE0561
CJE0562
CJE0563
CJE0564
CJE0565
CJE0566
CJE0567
CJE0568
CJE0569
CJE0570
CJE0571
CJE0572
CJE0573
CJE0574
CJE0575
CJE0576
CJE0577
CJE0578
CJE0579
CJE0580
CJE0581
CJE0582
CJE0583
CJE0584
CJE0585
CJE0586
CJE0587
CJE0588
CJE0589
CJE0590
CJE0591
CJE0592
CJE0593
CJE0594
CJE0595
CJE0596
CJE0597
CJE0598
CJE0599
CJE0600
CJE0601
CJE0602	Cj0494_6967965 (91.84%)
CJE0603	Cj0495_6967966 (100.00%)	HH0837_32262386 (39.11%)	HP1504_2314678 (36.94%)	jhp1397_4156002 (37.39%)
CJE0604	Cj0496_6967967 (100.00%)		HP0274_2313365 (48.67%)	jhp0259_4154780 (49.56%)	WS1914_34483927 (48.11%)
CJE0605	Cj0497_6967968 (99.53%)
CJE0606	trpC_6967969 (100.00%)				TRPC_34483925 (65.49%)
CJE0607	Cj0499_6967970 (99.38%)	HH0127_32261674 (45.62%)	HP0741_2313863 (42.58%)	jhp0678_4155223 (43.48%)	WS0435_34482577 (47.40%)
CJE0608	Cj0500_6967971 (99.10%)				WS2003_34484009 (37.39%)
CJE0610	hemH_6967972 (98.02%)	hemH_32262546 (37.29%)	hemH_2313479 (40.84%)	hemH_4155597 (40.84%)	WS2157_34484155 (41.61%)
CJE0611	Cj0504c_6967973 (99.65%)
CJE0612	Cj0505c_6967974 (98.04%)	wlaK_32262175 (54.04%)			WLBC_34484181 (49.44%)
CJE0613	alaS_6967975 (99.88%)		alaS_2314404 (58.73%)	alaS_4155760 (59.20%)	ALAS_34482473 (62.57%)
CJE0614	maf_6967976 (100.00%)		HP1240_2314403 (36.46%)	jhp1161_4155759 (37.02%)
CJE0615	pbpA_6967977 (99.69%)		HP0597_2313714 (48.33%)	jhp0544_4155095 (47.80%)	WS2049_34484053 (53.88%)
CJE0616	clpB_6967978 (99.53%)	clpA_32261656 (62.98%)	clpB_2313356 (61.17%)	clpB_4154766 (61.40%)	CLPB_34482740 (63.98%)
CJE0617	Cj0510c_6967979 (98.96%)
CJE0618	Cj0511_6967980 (99.55%)	HH1618_32263170 (50.46%)	HP1350_2314520 (53.81%)	prc_4155883 (53.59%)	WS0608_34482739 (58.68%)
CJE0619	purC_6967981 (99.15%)	purC_32263171 (63.40%)			PURC_34482738 (64.41%)
CJE0620	Cj0513_6967982 (100.00%)	purS_32263172 (46.25%)			WS0606_34482737 (47.37%)
CJE0621	purQ_6967983 (96.26%)	purQ_32263173 (58.80%)			purQ_34482736 (56.28%)
CJE0622	Cj0515_6967984 (98.37%)
CJE0623	plsC_6967985 (99.57%)	plsC_32263175 (37.50%)	plsC_2314519 (38.36%)	plsC_4155881 (37.61%)	PLSC_34482734 (39.74%)
CJE0624	crcB_6967986 (97.54%)		HP1225_2314388 (35.83%)	jhp1146_4155740 (37.50%)	WS1138_34483228 (41.32%)
CJE0625	htpG_6967987 (99.01%)	htpG_32263292 (53.16%)	htpG_2313300 (54.27%)	htpG_4154717 (54.66%)	htpG_34483764 (54.52%)
CJE0626	Cj0519_6967988 (99.04%)
CJE0627	Cj0520_6967989 (95.83%)
CJE0628		HH1503_32263054 (49.35%)
CJE0629	pbpB_6967993 (100.00%)	HH1410_32262961 (40.52%)	ftsI_2314739 (36.46%)	jhp1464_4156091 (36.28%)	WS1663_34483696 (40.97%)
CJE0630	fliE_6967994 (98.98%)	fliE_32262960 (58.16%)			FLIE_34483697 (59.00%)
CJE0631	flgC_6967995 (98.78%)	flgC_32262959 (71.43%)	flgC_2314741 (67.70%)	flgC_4156087 (67.08%)	WS1666_34483698 (72.39%)
CJE0632	flgB_6967996 (97.90%)	flgB_32262958 (43.28%)	flgB_2314742 (42.45%)	flgB_4156088 (42.45%)	WS1667_34483699 (46.72%)
CJE0633	Cj0529c_6967997 (99.33%)	pabC_32263123 (43.45%)	pabC_2313705 (44.08%)	jhp0535_4155082 (42.57%)	WS1063_34483162 (50.51%)
CJE0634	Cj0530_6967998 (99.42%)
CJE0635	icd_6967999 (99.86%)	HH1196_32262746 (77.38%)
CJE0636	mdh_6968000 (100.00%)
CJE0637	sucC_6968001 (100.00%)				SUCC_34483164 (58.95%)
CJE0638	sucD_6968002 (99.65%)				SUCD_34483165 (70.14%)
CJE0639	oorD_6968003 (99.03%)	oorD_32263121 (65.26%)	HP0588_2313706 (59.00%)	oorD_4155083 (59.00%)	WS1067_34483166 (63.00%)
CJE0640	oorA_6968004 (100.00%)	oorA_32263120 (65.24%)	HP0589_2313707 (63.20%)	oorA_4155084 (63.20%)	WS1068_34483167 (68.72%)
CJE0641	oorB_6968005 (100.00%)	oorB_32263119 (71.69%)	HP0590_2313708 (72.89%)	oorB_4155085 (73.63%)	WS1069_34483168 (70.85%)
CJE0642	oorC_6968006 (99.46%)	oorC_32263118 (64.29%)	HP0591_2313709 (60.77%)	oorC_4155077 (59.67%)	WS1070_34483169 (63.54%)
CJE0643	Cj0539_6968007 (100.00%)
CJE0644	Cj0540_6968008 (99.44%)
CJE0645	Cj0541_6968009 (99.66%)	HH1724_32263276 (50.17%)	ispB_2313331 (44.22%)	ispB_4154736 (43.56%)	WS1582_34483625 (48.48%)
CJE0646	hemA_6968010 (99.54%)	hemA_32263277 (44.72%)	hemA_2313330 (42.92%)	hemA_4154735 (42.56%)	HEMA_34483624 (49.42%)
CJE0647	proS_6968011 (98.59%)		proS_2313329 (53.68%)	proS_4154734 (54.04%)	PROS_34483623 (60.88%)
CJE0648	Cj0544_6968012 (98.45%)
CJE0649	hemC_6968013 (99.67%)	hemC_32263279 (51.14%)	hemC_2313328 (51.49%)	hemC_4154748 (51.32%)	HEMC_34483621 (54.58%)
CJE0650	Cj0546_6968014 (99.00%)	yigC_32262045 (49.50%)	HP0396_2313496 (51.48%)	jhp0985_4155574 (51.97%)	WS1540_34483586 (52.38%)
CJE0651	flaG_6968015 (100.00%)				WS0149_34482311 (36.70%)
CJE0652	fliD_6968016 (95.48%)
CJE0653	fliS_6968017 (100.00%)	fliS_32262340 (61.29%)	fliS_2313881 (60.48%)	fliS_4155244 (59.68%)	WS0151_34482313 (62.10%)
CJE0654	Cj0550_6968018 (100.00%)
CJE0655	efp_6968019 (100.00%)	efp_32261655 (73.48%)	HP0177_2313266 (73.48%)	efp_4154668 (73.48%)	EFP_34483360 (72.83%)
CJE0656	Cj0552_6968020 (100.00%)
CJE0657	Cj0553_6968021 (99.68%)
CJE0658	Cj0554_6968022 (99.70%)
CJE0659	Cj0555_6968023 (99.07%)
CJE0660	Cj0556_6968024 (99.25%)
CJE0661	Cj0557c_6968025 (99.72%)
CJE0662	proA_6968026 (98.78%)	proA_32262355 (41.23%)			proA_34483379 (41.59%)
CJE0663	Cj0559_6968027 (99.04%)	trxB_2_32262703 (49.19%)	trxB_2314321 (47.37%)	trxB_2_4155677 (46.71%)	TRXB_2_34482476 (49.04%)
CJE0666	Cj0561c_6968029 (99.35%)
CJE0667	dnaB_6968030 (100.00%)	dnaB_32263210 (41.65%)	dnaB_2314528 (38.39%)	dnaB_4155895 (38.18%)	DNAB_34482503 (47.88%)
CJE0668	Cj0563_6968031 (99.46%)
CJE0669	Cj0564_6968032 (100.00%)
CJE0670
CJE0671
CJE0672			HP0730_2313865 (77.23%)	jhp0667_4155229 (78.22%)
CJE0674	Cj0571_6968038 (99.31%)
CJE0675	ribA_6968039 (100.00%)	HH0208_32261755 (48.41%)	HP0804_2313934 (50.45%)	ribBA_4155296 (49.55%)	RIBA_34483305 (49.54%)
CJE0676	Cj0573_6968040 (99.32%)				WS2104_34484106 (51.39%)
CJE0677	ilvI_6968041 (99.82%)	ilvI_32262413 (63.81%)			ILVI_34482269 (64.06%)
CJE0678	ilvH_6968042 (100.00%)	ilvH_32262412 (51.32%)			ILVH_34482268 (55.63%)
CJE0679	lpxD_6968043 (100.00%)	lpxD_32262649 (46.67%)	lpxD_2313283 (41.98%)	lpxD_4154701 (41.67%)	lpxD_34482267 (52.19%)
CJE0680	queA_6968044 (98.83%)	queA_32263038 (50.00%)	queA_2314205 (51.59%)	queA_4154891 (51.59%)	queA_34482978 (50.44%)
CJE0681	mttB_6968045 (98.78%)	tatC_32263039 (49.80%)	HP1061_2314204 (50.41%)	jhp0364_4154890 (50.82%)	TATC_34482979 (53.31%)
CJE0682	Cj0579c_6968046 (100.00%)		HP1060_2314213 (35.97%)	jhp0365_4154889 (35.97%)
CJE0683	Cj0580c_6968047 (100.00%)	hemN_2_32262163 (40.22%)	hemN_2314389 (42.90%)	hemN_2_4155741 (43.18%)	WS1722_34483750 (38.87%)
CJE0684	Cj0581_6968048 (98.72%)	HH0617_32262165 (60.42%)	invA_2314391 (55.26%)	mutT_4155743 (55.26%)
CJE0685	lysC_6968049 (98.25%)	lysC_32262166 (64.09%)	lysC_2314392 (63.46%)	lysC_4155744 (62.96%)	LYSC_34483757 (67.08%)
CJE0686	Cj0583_6968050 (99.44%)				WS1730_34483758 (42.78%)
CJE0687	Cj0584_6968051 (98.49%)		holB_2314393 (38.37%)	holB_4155746 (37.79%)	WS1731_34483759 (36.87%)
CJE0688	folP_6968052 (99.74%)	folP_32262169 (42.86%)	folP_2314394 (42.02%)	folP_4155747 (42.02%)	FOLP_34483760 (42.82%)
CJE0689	ligA_6968053 (99.54%)	lig_32263355 (49.53%)	HP0615_2313737 (47.93%)	lig_4155109 (48.54%)	LIGA_34483813 (53.69%)
CJE0690	Cj0587_6968054 (99.10%)
CJE0691	tlyA_6968055 (98.81%)	HH0519_32262067 (41.60%)	HP1086_2314234 (40.18%)	hlyA_4154865 (40.35%)
CJE0692	ribF_6968056 (95.42%)	ribF_32262066 (44.84%)	ribC_2314235 (44.21%)	ribF_4154866 (43.51%)	RIBF_34482718 (39.72%)
CJE0693	Cj0590_6968057 (100.00%)	HH1852_32263404 (47.70%)	HP0388_2313489 (45.68%)	jhp0993_4155577 (45.68%)	WS0587_34482719 (47.68%)
CJE0694	Cj0591c_6968058 (100.00%)
CJE0695	Cj0592c_6968059 (100.00%)
CJE0696	Cj0593c_6968060 (100.00%)	HH1079_32262629 (77.34%)
CJE0697	Cj0594c_6968061 (100.00%)
CJE0698	nth_6968062 (100.00%)	nth_32263126 (62.07%)	HP0585_2313704 (58.59%)	nth_4155080 (58.08%)	NTH_34483159 (61.58%)
CJE0699	peb4\cbf2_6968063 (100.00%)	HH0105_32261652 (35.77%)	HP0175_2313264 (35.80%)	jhp0161_4154677 (35.52%)	WS1281_34483362 (39.41%)
CJE0700	fba_6968064 (100.00%)
CJE0701	Cj0598_6968065 (100.00%)
CJE0702	Cj0599_6968066 (99.68%)
CJE0703	Cj0600_6968067 (100.00%)
CJE0704	Cj0601c_6968068 (100.00%)	HH0472_32262020 (67.04%)
CJE0705	Cj0602c_6968069 (99.55%)
CJE0706	dsbD_6968070 (100.00%)
CJE0707	Cj0604_6968071 (99.66%)	HH0920_32262469 (47.59%)			WS0175_34482337 (51.87%)
CJE0708	Cj0605_6968072 (100.00%)
CJE0709	Cj0606_6968073 (100.00%)
CJE0710	Cj0607_6968074 (99.69%)				WS1418_34483483 (41.26%)
CJE0711	Cj0608_6968075 (99.34%)
CJE0712	Cj0609c_6968076 (98.47%)	HH1082_32262632 (38.65%)
CJE0713	Cj0610c_6968077 (98.51%)
CJE0714	Cj0611c_6968078 (98.69%)	HH1084_32262634 (53.07%)
CJE0715	cft_6968079 (100.00%)	HH1334_32262885 (74.69%)	HP0653_2313771 (63.86%)	pfr_4155130 (63.25%)
CJE0716	pstS_6968080 (93.35%)				PSTS_34483053 (53.61%)
CJE0717	pstC_6968081 (100.00%)
CJE0718	pstA_6968082 (99.45%)
CJE0719	pstB_6968083 (99.59%)				pstB_34483050 (60.48%)
CJE0721
CJE0722	Cj0619_6968086 (99.32%)
CJE0723	Cj0620_6968087 (96.28%)
CJE0724	Cj0621_6968088 (97.63%)
CJE0725	hypF_6968089 (98.22%)		hypF_2313122 (35.36%)	jhp0041_4154540 (35.52%)
CJE0726	hypB_6968090 (99.60%)	hypB_32261873 (49.04%)	hypB_2314035 (44.64%)	hypB_4155406 (45.09%)	HYPB_34482905 (50.23%)
CJE0727	hypC_6968091 (100.00%)	hypC_32261872 (48.72%)	hypC_2314034 (53.33%)	hypC_4155405 (56.00%)	hypC_34482906 (49.37%)
CJE0728	hypD_6968092 (99.72%)	hypD_32261870 (57.92%)	hypD_2314033 (58.47%)	hypD_4155404 (58.20%)	HYPD_34482907 (54.55%)
CJE0729	hypE_6968093 (98.77%)	hypE_32261868 (47.75%)	hypE_2313121 (47.15%)	hypE_4154539 (46.85%)	HYPE_34482909 (46.25%)
CJE0730	hypA_6968094 (98.25%)	hypA_32262357 (35.65%)	hypA_2313996 (41.38%)	hypA_4155353 (41.38%)	WS0796_34482910 (37.93%)
CJE0731
CJE0732				res_1_4155900 (47.26%)
CJE0733	Cj0630c_6968097 (96.88%)
CJE0734	Cj0631c_6968098 (97.67%)	HH0534_32262082 (39.16%)	vacB_2314413 (35.52%)	vacB_4155766 (35.06%)	WS1875_34483889 (47.62%)
CJE0735	ilvC_6968099 (99.71%)	ilvC_32262754 (73.02%)	ilvC_2313431 (52.62%)	ilvC_4154860 (52.92%)	ilvC_34483892 (71.76%)
CJE0736	Cj0633_6968100 (98.06%)
CJE0737	Cj0634_6968101 (97.67%)	dprA_32262777 (46.18%)	dprA_2313434 (48.75%)	jhp0316_4154854 (49.17%)	WS1883_34483897 (45.82%)
CJE0738	Cj0635_6968102 (100.00%)	HH1229_32262779 (50.00%)	HP0334_2313435 (45.67%)	jhp0317_4154855 (45.67%)	WS1884_34483898 (54.92%)
CJE0739	Cj0636_6968103 (97.49%)
CJE0740	mrsA_6968104 (97.58%)	msrA_32262288 (39.88%)
CJE0741	ppa_6968105 (98.84%)	ppa_32263400 (72.73%)	HP0620_2313741 (59.30%)	ppa_4155114 (59.30%)	PPA_34483809 (76.02%)
CJE0742	adk_6968106 (98.44%)	adk_32263323 (66.31%)	HP0618_2313740 (61.83%)	adk_4155112 (61.83%)	WS1782_34483807 (62.03%)
CJE0743	aspS_6968107 (98.63%)	aspS_32263353 (67.41%)	aspS_2313739 (64.48%)	aspS_4155111 (64.95%)	ASPS_34483806 (68.62%)
CJE0744	Cj0641_6968108 (98.95%)	HH1296_32262847 (36.43%)	HP1394_2314563 (37.01%)	jhp1433_4156053 (36.59%)	WS1623_34483658 (40.49%)
CJE0745	recN_6968109 (99.21%)	recN_32262846 (38.91%)	recN_2314562 (36.12%)	recN_4156063 (35.73%)	recN_34483657 (42.57%)
CJE0746	Cj0643_6968110 (99.52%)
CJE0747	Cj0644_6968111 (98.89%)	HH1322_32262873 (53.70%)	HP1573_2314758 (50.39%)	jhp1481_4156101 (50.39%)	WS2073_34484076 (51.76%)
CJE0748	Cj0645_6968112 (100.00%)	dniR_32262874 (38.32%)	HP1572_2314753 (37.53%)	dniR_4156100 (38.02%)	WS2072_34484075 (40.05%)
CJE0749	Cj0646_6968113 (100.00%)	rlpA_32262875 (49.58%)			WS2071_34484074 (45.94%)
CJE0750	Cj0647_6968114 (98.15%)	HH1326_32262877 (38.31%)	HP1570_2314751 (40.24%)	jhp1478_4156098 (41.46%)	WS2069_34484072 (49.69%)
CJE0751	Cj0648_6968115 (93.06%)
CJE0752	Cj0649_6968116 (99.35%)	HH1328_32262879 (35.21%)			WS2067_34484070 (35.92%)
CJE0753	Cj0650_6968117 (99.49%)		HP1567_2314750 (50.00%)	jhp1475_4156107 (50.00%)	WS2065_34484069 (46.91%)
CJE0754	Cj0651_6968118 (100.00%)
CJE0755	pbpC_6968119 (99.17%)	HH1332_32262883 (44.98%)	pbp2_2314749 (44.01%)	jhp1473_4156105 (44.46%)	WS2062_34484066 (48.74%)
CJE0756	Cj0653c_6968120 (99.33%)
CJE0757
CJE0759
CJE0761	Cj0659c_6968121 (98.90%)
CJE0762
CJE0763	era_6968123 (98.63%)	HH0308_32261856 (42.86%)	HP0517_2313632 (43.10%)	era_4154994 (44.14%)	WS1292_34483372 (46.81%)
CJE0764	hslU_6968124 (99.54%)	hslU_32261857 (63.27%)	hslU_2313631 (62.27%)	hslU_4154993 (62.27%)	hslU_34483373 (65.23%)
CJE0765	hslV_6968125 (100.00%)	hslV_32261858 (71.02%)	hslV_2313630 (67.61%)	hslV_4155004 (67.61%)	hslV_34483374 (78.49%)
CJE0766	rplI_6968126 (100.00%)	rplI_32261859 (50.68%)	rpl9_2313629 (55.03%)	rplI_4155003 (55.70%)	RPLI_34483375 (53.42%)
CJE0767	argG_6968127 (99.26%)	argG_32262771 (79.00%)			ARGG_34484160 (77.56%)
CJE0768	Cj0667_6968129 (98.77%)	HH1702_32263254 (61.04%)	HP1423_2314597 (44.87%)	jhp1318_4155923 (43.59%)	WS2160_34484158 (57.50%)
CJE0769	Cj0668_6968130 (97.78%)	HH1076_32262626 (40.14%)	HP0716_2313840 (44.25%)	jhp0654_4155206 (46.02%)	WS2098_34484100 (41.73%)
CJE0770	Cj0669_6968131 (100.00%)	yhbG_32262625 (69.87%)	HP0715_2313839 (65.83%)	jhp0653_4155205 (66.25%)	WS2099_34484101 (64.85%)
CJE0771	rpoN_6968132 (99.52%)		rpoN_2313838 (47.43%)	rpoN_4155204 (47.68%)	RPON_34484102 (49.52%)
CJE0772	dcuB_6968133 (98.95%)				DCUB_34483793 (70.47%)
CJE0773
CJE0776
CJE0778	uvrB_6968137 (99.70%)	uvrB_32263099 (65.50%)	uvrB_2314265 (63.77%)	uvrB_4155631 (63.62%)	UVRB_34483969 (65.18%)
CJE0779	Cj0681_6968138 (100.00%)
CJE0780	Cj0682_6968139 (100.00%)
CJE0781	Cj0683_6968140 (100.00%)
CJE0782	priA_6968141 (98.70%)	priA_32263102 (46.95%)	priA_2313488 (44.48%)	priA_4155576 (44.83%)	PRIA_34483971 (44.96%)
CJE0783	Cj0685c_6968142 (98.60%)
CJE0785	gcpE_6968143 (99.44%)	gcpE_32262356 (63.71%)	gcpE_2313753 (63.14%)	jhp0569_4155121 (62.18%)	gcpE_34483381 (64.53%)
CJE0786	flgH_6968144 (100.00%)	flgH_32262448 (40.62%)	flgH_2313423 (38.40%)	flgH_4154828 (39.50%)	flgH_34484107 (52.97%)
CJE0787	pta_6968145 (99.80%)
CJE0788	ackA_6968146 (98.74%)	ackA_32262859 (47.38%)		ackA_4155410 (52.63%)
CJE0789	Cj0690c_6968147 (97.20%)
CJE0790	Cj0691_6968148 (100.00%)
CJE0791	Cj0692c_6968149 (99.36%)
CJE0792	Cj0693c_6968150 (98.71%)	HH1279_32262830 (46.33%)	HP0707_2313835 (48.04%)	jhp0646_4155209 (48.01%)	WS0170_34482332 (53.09%)
CJE0793	Cj0694_6968151 (99.40%)
CJE0794	ftsA_6968152 (99.57%)	ftsA_32262328 (43.65%)	ftsA_2314120 (39.16%)	ftsA_4155486 (39.66%)	FTSA_34482388 (50.64%)
CJE0795	ftsZ_6968153 (100.00%)	ftsZ_32262327 (51.58%)	ftsZ_2314121 (45.45%)	ftsZ_4155487 (44.35%)	FTSZ_34482387 (58.44%)
CJE0796	flgG2_6968154 (99.63%)	flgG_1_32262640 (48.92%)	flgG_2314244 (43.01%)	flgG_1_4154843 (44.49%)	WS1801_34483821 (45.68%)
CJE0797	flgG_6968155 (100.00%)	flgG_2_32262631 (69.32%)	flgG_2314768 (61.98%)	flgG_2_4156115 (61.98%)	FLGG_2_34483822 (71.21%)
CJE0798	glnA_6968156 (99.58%)	glnA_32262108 (65.18%)	glnA_2313621 (63.64%)	glnA_4155001 (63.64%)	GLNA_34484126 (63.85%)
CJE0799
CJE0800	Cj0700_6968157 (99.57%)	HH0659_32262208 (52.25%)	HP0170_2313260 (49.35%)	jhp0156_4154672 (52.05%)	WS2123_34484125 (51.64%)
CJE0801	Cj0701_6968158 (98.08%)		prtC_2313253 (55.29%)	jhp0155_4154671 (55.05%)	WS2122_34484124 (54.96%)
CJE0802	purE_6968159 (100.00%)	purE_32262076 (62.35%)			PURE_34484123 (67.68%)
CJE0804	glyQ_6968161 (99.30%)	glyQ_32262079 (69.86%)	glyQ_2314096 (68.77%)	glyQ_4155459 (67.72%)	GLYQ_34484120 (71.08%)
CJE0805	Cj0705_6968162 (99.17%)		HP0959_2314095 (42.26%)	jhp0893_4155458 (43.57%)
CJE0806	Cj0706_6968163 (97.06%)	HH0639_32262188 (40.69%)	HP0958_2314102 (36.78%)	jhp0892_4155457 (37.19%)
CJE0807	kdtA_6968164 (96.88%)	waaA_32262189 (45.43%)	kdtA_2314094 (45.60%)	waaA_4155456 (45.62%)	WS2116_34484118 (40.16%)
CJE0808	Cj0708_6968165 (96.00%)	HH0641_32262190 (43.85%)	HP0956_2314093 (46.25%)	jhp0890_4155455 (47.50%)	WS2115_34484117 (44.40%)
CJE0809	ffh_6968166 (98.20%)	ffh_32262490 (55.28%)	HP1152_2314305 (61.49%)	ffh_4155673 (61.49%)	FFH_34482681 (63.57%)
CJE0810	rpsP_6968167 (100.00%)	rpsP_32262488 (75.68%)	HP1151_2314310 (73.33%)	rpsP_4155672 (70.67%)	rpsP_34482682 (73.97%)
CJE0811	Cj0711_6968168 (100.00%)	HH0938_32262487 (48.72%)			WS0549_34482683 (47.50%)
CJE0812	rimM_6968169 (99.44%)		HP1149_2314304 (37.22%)	jhp1076_4155670 (36.31%)
CJE0813	trmD_6968170 (99.15%)	trmD_32262485 (54.19%)	trmD_2314303 (52.81%)	trmD_4155669 (52.81%)	trmD_34482685 (48.28%)
CJE0814	rplS_6968171 (100.00%)	rplS_32262484 (69.49%)	HP1147_2314302 (71.79%)	rplS_4155668 (71.79%)	rplS_34482686 (69.49%)
CJE0815	Cj0715_6968172 (100.00%)
CJE0816	Cj0716_6968173 (99.55%)	aroF_32263108 (62.32%)	dhs1_2313220 (59.59%)	aroF_4154629 (59.55%)	WS1452_34483514 (62.30%)
CJE0817	Cj0717_6968174 (98.17%)	HH1762_32263314 (35.09%)			WS1318_34483396 (38.39%)
CJE0818	dnaE_6968175 (99.33%)		dnaE_2314638 (55.07%)	dnaE_4155965 (55.46%)	dnaE_34483990 (62.55%)
CJE0819	Cj0719c_6968176 (100.00%)	HH1682_32263234 (50.25%)	HP0395_2313495 (47.47%)	jhp0986_4155573 (47.47%)	WS2225_34481792 (56.06%)
CJE0820	flaC_6968177 (99.20%)				FLA_34483173 (42.06%)
CJE0821	Cj0721c_6968178 (96.15%)		HP0288_2313388 (35.86%)	jhp0273_4154797 (35.86%)	WS0563_34482697 (36.67%)
CJE0822	Cj0722c_6968179 (97.42%)	hemK_32262899 (35.71%)	hemK_2313486 (36.94%)	hemG_4155582 (37.69%)	HEMG_34482379 (35.40%)
CJE0823	Cj0723c_6968180 (98.73%)	HH1349_32262900 (43.65%)	HP0382_2313487 (38.54%)	jhp0999_4155583 (38.29%)	WS0223_34482380 (40.51%)
CJE0824	Cj0724_6968181 (98.36%)
CJE0825	mog_6968182 (100.00%)	mog_32261596 (68.57%)	HP0799_2313931 (65.34%)	mog_4155305 (64.77%)	MOG_34483285 (67.05%)
CJE0826	corA_6968183 (99.39%)	corA_32263231 (58.61%)	corA_2314510 (48.94%)	corA_4155864 (48.63%)	WS1032_34483133 (58.23%)
CJE0827	Cj0727_6968184 (99.43%)
CJE0828	Cj0728_6968185 (98.87%)
CJE0829	Cj0729_6968186 (98.51%)
CJE0830	Cj0730_6968187 (98.92%)
CJE0831	Cj0731_6968188 (98.46%)
CJE0832	Cj0732_6968189 (95.57%)
CJE0833	Cj0733_6968190 (99.53%)
CJE0834	hisJ_6968191 (99.60%)
CJE0835	Cj0735_6968192 (98.02%)
CJE0837
CJE0838
CJE0839
CJE0840
CJE0841
CJE0842
CJE0843
CJE0845	tonB3_6968201 (100.00%)
CJE0846
CJE0847	cfrA_6968202 (93.82%)	cfrA_32262270 (39.91%)
CJE0849	grpE_6968204 (92.05%)	grpE_32262213 (41.85%)	grpE_2313192 (37.93%)	grpE_4154609 (37.10%)	GRPE_34482633 (44.63%)
CJE0850	dnaK_6968205 (99.84%)	dnaK_32262212 (76.96%)	dnaK_2313191 (78.01%)	dnaK_4154608 (78.33%)	WS0494_34482632 (77.34%)
CJE0851	Cj0760_6968206 (97.50%)	HH0934_32262483 (48.25%)
CJE0852	Cj0761_6968207 (96.46%)		HP0902_2314040 (50.00%)	jhp0839_4155409 (48.00%)
CJE0853	aspB_6968208 (98.46%)	HH1671_32263223 (57.25%)	aspB_2313794 (57.99%)	aspB_4155168 (58.29%)	ASPB_34482460 (62.24%)
CJE0854	cysE_6968209 (99.53%)	cysE_32262784 (60.00%)			CYSE_34482687 (55.33%)
CJE0855	speA_6968210 (99.84%)	speA_32262783 (65.52%)	speA_2313524 (62.62%)	speA_4155545 (62.46%)	WS0554_34482688 (66.07%)
CJE0856	hisS_6968211 (100.00%)
CJE0857	tmk_6968212 (100.00%)	tmk_32262913 (44.10%)	HP1474_2314650 (48.97%)	tmk_4155994 (47.42%)	WS0613_34482744 (49.73%)
CJE0858	kdtB_6968213 (100.00%)	kdtB_32262912 (59.73%)	kdtB_2314651 (57.05%)	kdtB_4155995 (58.39%)	kdtB_34482743 (55.70%)
CJE0859	Cj0768c_6968214 (100.00%)	ubiD_32262911 (43.55%)	HP1476_2314652 (39.13%)	ubiD_4155996 (38.59%)	WS0611_34482742 (44.02%)
CJE0860	Cj0769c_6968215 (100.00%)
CJE0861	Cj0770c_6968216 (100.00%)
CJE0862	Cj0771c_6968217 (100.00%)
CJE0863	Cj0772c_6968218 (99.61%)	yaeC_32262262 (51.27%)	HP1564_2314748 (47.33%)	jhp1472_4156104 (48.73%)	WS1945_34483955 (58.12%)
CJE0864	Cj0773c_6968219 (100.00%)
CJE0865	Cj0774c_6968220 (100.00%)		HP1576_2314761 (38.66%)	jhp1484_4156118 (39.03%)	WS1943_34483953 (57.46%)
CJE0866	valS_6968221 (99.77%)	valS_32262482 (60.02%)	valS_2314306 (59.75%)	valS_4155674 (59.70%)	WS1652_34483686 (62.67%)
CJE0867	Cj0776c_6968222 (97.06%)
CJE0868	Cj0777_6968223 (99.85%)	rep_32262480 (52.46%)	HP0911_2314046 (47.54%)	jhp0847_4155417 (47.09%)	WS1650_34483684 (51.62%)
CJE0869	peb2_6968224 (98.37%)
CJE0870	tpx_6968225 (99.43%)	tpx_32263370 (57.32%)	tagD_2313491 (42.24%)	tpx_4155579 (42.24%)	WS1601_34483640 (57.96%)
CJE0871	napA_6968226 (100.00%)	napA_32261705 (72.75%)			NAPA_34483265 (75.49%)
CJE0872	napG_6968227 (98.37%)	HH0159_32261706 (55.47%)			NAPG_34483264 (50.97%)
CJE0873	napH_6968228 (99.61%)	HH0160_32261707 (46.41%)			NAPH_34483263 (46.15%)
CJE0874	napB_6968229 (99.42%)	napB_32261708 (47.59%)
CJE0875	Cj0784_6968230 (99.01%)
CJE0876	napD_6968231 (99.11%)
CJE0877	Cj0786_6968232 (100.00%)
CJE0878	Cj0787_6968233 (98.77%)	HH1611_32263163 (38.96%)		jhp0154_4154670 (35.80%)	WS1814_34483833 (58.02%)
CJE0879	Cj0788_6968234 (98.77%)
CJE0880	Cj0789_6968235 (98.54%)				WS1819_34483837 (39.30%)
CJE0881	purU_6968236 (99.64%)	purU_32263243 (57.51%)	purU_2314610 (56.89%)	purU_4155950 (56.39%)	PURU_34483533 (61.17%)
CJE0882	Cj0791c_6968237 (98.82%)		HP0405_2313511 (45.39%)	jhp0976_4155567 (44.92%)	WS1189_34483275 (48.20%)
CJE0883	Cj0792_6968238 (98.63%)
CJE0884	Cj0793_6968239 (100.00%)	HH0140_32261687 (43.27%)	atoS_2313338 (42.39%)	jhp0229_4154755 (42.86%)	WS1590_34483632 (45.97%)
CJE0885	Cj0794_6968240 (94.52%)
CJE0886	murF_6968241 (98.11%)	HH0128_32261675 (44.86%)	murF_2313862 (42.42%)	murF_4155222 (42.63%)	MURF_34482578 (43.13%)
CJE0887	Cj0796c_6968242 (95.82%)	HH0130_32261677 (48.95%)	HP0739_2313861 (46.47%)	jhp0676_4155221 (46.06%)
CJE0888	Cj0797c_6968243 (100.00%)
CJE0889	ddlA_6968244 (98.27%)	ddl_32261678 (52.00%)	ddlA_2313860 (53.43%)	ddl_4155237 (52.86%)	DDLA_34482580 (56.23%)
CJE0890	ruvA_6968245 (99.45%)	ruvA_32262062 (35.71%)	ruvA_2314020 (36.61%)	ruvA_4155386 (37.70%)	RUVA_34482582 (41.71%)
CJE0891	Cj0800c_6968246 (98.06%)
CJE0892	Cj0801_6968247 (99.79%)		mviN_2314021 (45.40%)	jhp0817_4155388 (45.28%)	WS0442_34482584 (42.40%)
CJE0893	cysS_6968248 (98.92%)	cysS_32262065 (48.25%)	cysS_2314022 (50.00%)	cysS_4155389 (50.11%)	CYSS_34482585 (50.00%)
CJE0894	msbA_6968249 (98.97%)	msbA_32262233 (44.90%)	msbA_2314232 (43.36%)	msbA_4154873 (43.09%)	WS0256_34482410 (49.01%)
CJE0895	pyrD_6968250 (98.30%)		pyrD_2314154 (47.59%)	pyrD_4154946 (48.16%)	PYRD_34481786 (54.86%)
CJE0896	Cj0805_6968251 (99.28%)	HH1625_32263177 (57.21%)	pqqE_2314155 (57.18%)	jhp0411_4154947 (54.50%)	WS2220_34481787 (62.20%)
CJE0897	dapA_6968252 (99.66%)	dapA_32263178 (61.30%)	dapA_2314156 (56.51%)	dapA_4154941 (56.51%)	DAPA_34481788 (63.14%)
CJE0898	Cj0807_6968253 (99.23%)	HH1627_32263179 (65.64%)	hdhA_2314157 (64.86%)	jhp0409_4154942 (64.86%)	WS2222_34481789 (68.63%)
CJE0899	Cj0808c_6968254 (99.01%)
CJE0900	Cj0809c_6968255 (85.86%)	ycbL_32262048 (40.35%)	HP0813_2313945 (43.35%)	jhp0749_4155325 (44.33%)	WS0298_34482448 (47.72%)
CJE0901	nadE_6968256 (99.59%)	nadE_32262558 (47.89%)	nadE_2313427 (47.60%)	nadE_4154831 (47.60%)	NADE_34482363 (47.35%)
CJE0902	lpxK_6968257 (99.03%)	lpxK_32262559 (38.87%)	HP0328_2313426 (41.23%)	lpxK_4154830 (40.13%)	WS0204_34482361 (40.94%)
CJE0903	thrC_6968258 (99.15%)	thrC_32262075 (44.98%)	thrC_2313178 (43.48%)	thrC_4154598 (42.24%)	THRC_34484112 (48.12%)
CJE0904	kdsB_6968259 (97.07%)	kdsB_32261715 (48.95%)	kdsB_2313323 (47.08%)	kdsB_4154741 (47.50%)	kdsB_34483930 (51.04%)
CJE0905
CJE0906	glnH_6968263 (91.76%)				WS0279_34482430 (38.86%)
CJE0907	fliP_6968266 (100.00%)	fliP_32262241 (71.62%)		fliP_4155178 (70.29%)	FLIP_34484095 (70.59%)
CJE0908	glmU_6968267 (98.60%)	glmU_32262240 (49.32%)	glmU_2313807 (47.58%)	glmU_4155177 (45.96%)	WS2089_34484092 (53.16%)
CJE0909	dfp_6968268 (98.44%)	dfp_32262886 (39.64%)	HP0841_2313973 (40.23%)	dfp_4155346 (40.17%)	DFP_34484064 (40.87%)
CJE0910	Cj0823_6968269 (99.51%)
CJE0911	uppS_6968270 (100.00%)	HH1093_32262643 (41.92%)	HP1221_2314380 (42.61%)	jhp1142_4155749 (41.67%)	UPPS_34484062 (47.09%)
CJE0912	Cj0825_6968271 (99.22%)
CJE0913	Cj0826_6968272 (99.71%)
CJE0914	truA_6968273 (98.75%)	truA_32262149 (35.80%)	hisT_2313463 (37.86%)	truA_4155610 (37.45%)	truA_34482804 (39.66%)
CJE0915	ilvA_6968274 (98.01%)	cysK_32262445 (59.75%)			ILVA_34482295 (62.09%)
CJE0916	Cj0829c_6968275 (97.08%)				WS0131_34482294 (40.50%)
CJE0917	Cj0830_6968276 (99.28%)	HH0165_32261712 (42.76%)	HP1502_2314685 (44.06%)	jhp1395_4156015 (41.26%)
CJE0918	trmA_6968277 (97.20%)				TRMA_34484096 (42.66%)
CJE0919	Cj0832c_6968278 (99.48%)
CJE0920	Cj0833c_6968279 (99.20%)	HH1559_32263110 (51.25%)	HP0357_2313457 (47.30%)	jhp1023_4155614 (47.72%)	WS2125_34484127 (48.56%)
CJE0921	Cj0834c_6968280 (98.79%)
CJE0922	acnB_6968281 (99.06%)	acnB_32263289 (65.96%)	acnB_2313908 (65.88%)	acnB_4155281 (65.76%)	ACNB_34483273 (67.65%)
CJE0923	ogt_6968282 (98.67%)		dat1_2313803 (44.22%)	ogt_4155163 (44.90%)
CJE0924	Cj0837c_6968283 (97.12%)
CJE0925	metS_6968284 (97.93%)	metG_32262893 (54.42%)	metS_2313521 (49.07%)	metG_4155547 (49.03%)	METS_34482374 (57.63%)
CJE0926	Cj0839c_6968285 (98.46%)	HH1343_32262894 (46.97%)	HP1384_2314559 (41.54%)	jhp1441_4156057 (44.07%)
CJE0927	fbp_6968286 (98.93%)	fbp_32262895 (52.90%)	HP1385_2314552 (39.86%)	fbp_4156058 (39.57%)	FBP_34482375 (48.57%)
CJE0928	Cj0841c_6968287 (96.32%)	mobB_32261595 (41.21%)			WS1198_34483284 (43.75%)
CJE0929	Cj0842_6968288 (98.14%)
CJE0930	Cj0843c_6968289 (99.82%)
CJE0931	Cj0844c_6968290 (98.92%)	HH0581_32262129 (46.67%)	HP0644_2313764 (38.37%)	jhp0589_4155132 (38.37%)	WS0273_34482425 (55.56%)
CJE0932	gltX_6968291 (98.84%)	gltX_2_32262130 (52.70%)	gltX_2313763 (50.57%)	gltX_2_4155131 (51.47%)	GLTX_34482426 (53.30%)
CJE0933	Cj0846_6968292 (99.47%)		HP1044_2314191 (38.24%)	jhp0380_4154919 (38.77%)
CJE0934	psd_6968293 (97.74%)	psd_32263390 (39.63%)	HP1357_2314525 (47.97%)	psd_4155876 (48.34%)	WS1275_34483356 (41.11%)
CJE0935	Cj0848c_6968294 (100.00%)	flhB_2_32262871 (48.00%)	HP1575_2314760 (39.24%)	flhB_2_4156117 (39.24%)	WS2076_34484079 (43.90%)
CJE0936	Cj0849c_6968295 (93.74%)
CJE0937	Cj0850c_6968296 (99.49%)				WS1952_34483961 (46.61%)
CJE0938	Cj0851c_6968297 (99.40%)
CJE0939	Cj0852c_6968298 (100.00%)
CJE0940	hemL_6968299 (99.53%)	hemL_32262514 (57.89%)	hemL_2313404 (60.05%)	hemL_4154823 (59.81%)	hemL_34483900 (59.67%)
CJE0941	Cj0854c_6968300 (99.13%)	HH1365_32262916 (41.90%)	HP0236_2313334 (38.60%)	jhp0221_4154747 (38.79%)	WS1344_34483417 (37.96%)
CJE0942	folD_6968301 (98.94%)	folD_32262917 (59.07%)	folD_2313696 (54.55%)	folD_4155069 (54.18%)	FOLD_34483418 (59.79%)
CJE0943	lepP_6968302 (99.29%)		lepB_2313695 (45.45%)	lepB_4155068 (45.80%)	LEPP_34483419 (50.00%)
CJE0944	moeA_6968303 (97.67%)	moeA_2_32262292 (35.44%)	moeA_2313255 (36.73%)	moeA_4154674 (35.39%)	MOEA_34482947 (37.50%)
CJE0945	murA_6968304 (99.28%)	murA_32262124 (65.08%)	murZ_2313767 (59.38%)	murA_4155136 (58.67%)	MURA_34482491 (66.27%)
CJE0946	Cj0859c_6968305 (98.59%)
CJE0947	Cj0860_6968306 (98.62%)
CJE0948	pabA_6968307 (98.40%)	trpG_32261850 (50.00%)	trpD_2314447 (39.67%)	trpG_4155806 (38.59%)	WS2172_34484167 (39.89%)
CJE0949	pabB_6968308 (97.81%)	trpE_1_32261851 (44.19%)
CJE0950	xerD_6968309 (99.15%)	xerD_32263397 (48.04%)	xerC_2313795 (47.51%)	jhp0617_4155169 (48.45%)	WS1221_34483304 (52.10%)
CJE0951
CJE0952	dsbB_6968311 (99.23%)
CJE0954	dsbA_6968312 (97.18%)
CJE0958	Cj0878_6968317 (100.00%)
CJE0959	Cj0879c_6968318 (99.05%)
CJE0960	Cj0880c_6968319 (100.00%)
CJE0961	Cj0881c_6968320 (99.43%)	HH0468_32262016 (41.16%)	HP1042_2314198 (41.21%)	jhp0382_4154917 (41.09%)	WS1052_34483152 (42.90%)
CJE0962	flhA_6968321 (99.86%)	flhA_32262015 (50.84%)	flhA_2314189 (51.37%)	flhA_4154916 (52.05%)
CJE0963	Cj0883c_6968322 (100.00%)
CJE0964	rpsO_6968323 (100.00%)	rpsO_32262089 (71.11%)	HP1040_2314183 (58.89%)	rpsO_4154915 (60.00%)	rpsO_34483154 (65.56%)
CJE0965	ftsK_6968324 (96.60%)	ftsK_32262001 (42.74%)
CJE0966	flaD_6968325 (97.33%)
CJE0967	Cj0888c_6968326 (99.38%)				WS0248_34482402 (53.10%)
CJE0968	Cj0889c_6968327 (99.30%)
CJE0969	Cj0890c_6968328 (100.00%)				WS0950_34483055 (47.32%)
CJE0970	serA_6968329 (100.00%)	serA_32261682 (55.49%)	serA_2313497 (50.67%)	serA_4155559 (50.86%)	SERA_34483391 (60.95%)
CJE0971	Cj0892c_6968330 (99.38%)
CJE0972	rpsA_6968331 (99.28%)	rpsA_32261684 (51.01%)	rps1_2313498 (47.40%)	rpsA_4155561 (48.38%)	RPSA_34483389 (51.39%)
CJE0973	lytB_6968332 (99.64%)	lytB_32261685 (58.09%)	lytB_2313506 (59.04%)	lytB_4155562 (59.04%)	WS1310_34483388 (56.00%)
CJE0974	aroA_6968333 (99.77%)	aroA_32261686 (51.15%)	aroA_2313507 (52.53%)	aroA_4155563 (52.52%)	WS1309_34483387 (53.77%)
CJE0975	pheT_6968334 (99.61%)	pheT_32261574 (38.09%)	pheT_2313508 (36.34%)	pheT_4155564 (35.26%)	pheT_34483386 (40.63%)
CJE0976	pheS_6968335 (100.00%)	pheS_32261575 (64.13%)	pheS_2313509 (58.36%)	pheS_4155565 (58.05%)	PHES_34483385 (65.45%)
CJE0977	Cj0898_6968336 (100.00%)	HH0029_32261576 (57.94%)	HP0404_2313510 (56.57%)	jhp0977_4155566 (56.57%)	WS1306_34483384 (60.00%)
CJE0978	thiJ_6968337 (100.00%)	thiJ_32263396 (49.47%)			thiJ_34483359 (39.25%)
CJE0979	Cj0900c_6968338 (100.00%)
CJE0980	Cj0901_6968339 (99.19%)
CJE0981	glnQ_6968340 (99.59%)
CJE0982	Cj0903c_6968341 (99.59%)	dagA_32263183 (54.98%)			WS1301_34483380 (35.88%)
CJE0983	Cj0904c_6968342 (99.35%)	HH0378_32261926 (45.58%)			WS1472_34483532 (47.33%)
CJE0984	alr_6968343 (97.56%)	HH1516_32263067 (35.17%)
CJE0985	Cj0906c_6968344 (98.46%)	HH0307_32261854 (39.35%)	HP0518_2313633 (36.34%)	jhp0467_4154995 (36.34%)	WS1291_34483371 (41.36%)
CJE0986	Cj0908_6968345 (98.72%)
CJE0987	Cj0909_6968346 (100.00%)
CJE0988	Cj0910_6968347 (100.00%)
CJE0989	Cj0911_6968348 (99.46%)
CJE0990	cysM_6968349 (99.67%)	cysK_2_32262398 (67.23%)	cysK_2313190 (39.22%)	cysK_4154606 (39.53%)	WS1188_34483274 (53.80%)
CJE0991	hupB_6968350 (100.00%)	HH0793_32262342 (40.86%)	HP0835_2313970 (42.22%)	jhp0774_4155341 (41.11%)	HU_34482637 (60.44%)
CJE0992	Cj0914c_6968351 (99.34%)				WS1211_34483295 (40.39%)
CJE0993	Cj0915_6968352 (99.27%)
CJE0994	Cj0916c_6968353 (100.00%)	HH1783_32263335 (57.38%)
CJE0995	cstA_6968354 (98.72%)	cstA_32263427 (64.10%)	cstA_2314324 (65.91%)	jhp1095_4155693 (65.91%)
CJE0996	prsA_6968355 (100.00%)	prsA_32263087 (71.43%)	prsA_2313870 (71.43%)	prsA_4155224 (71.43%)	PRSA_34483669 (75.08%)
CJE0997	Cj0919c_6968356 (100.00%)	gltK_32263034 (75.80%)
CJE0998	Cj0920c_6968357 (100.00%)	HH1482_32263033 (75.40%)
CJE0999	peb1A_6968358 (98.84%)	HH1481_32263032 (74.51%)
CJE1000	pebC_6968359 (100.00%)	glnQ_2_32263031 (83.26%)			WS0277_34482428 (53.94%)
CJE1001	cheR_6968360 (100.00%)
CJE1002	cheB'_6968361 (100.00%)	cheB_32262004 (36.56%)			WS1213_34483297 (37.10%)
CJE1003	rpiB_6968362 (100.00%)	rpiB_32262919 (49.28%)	lacA_2313693 (45.00%)	rpi_4155066 (45.71%)	lacA_34483421 (53.62%)
CJE1004	Cj0926_6968363 (100.00%)	HH1369_32262920 (51.89%)	HP0573_2313701 (50.00%)	jhp0520_4155065 (48.18%)	WS1349_34483422 (48.18%)
CJE1005	apt_6968364 (99.45%)	apt_32262921 (51.43%)	HP0572_2313692 (54.71%)	apt_4155064 (53.59%)	APT_34483423 (56.59%)
CJE1006	Cj0928_6968365 (100.00%)	HH1371_32262922 (59.20%)	HP0571_2313691 (61.38%)	jhp0518_4155063 (60.85%)	WS1352_34483425 (61.31%)
CJE1007	pepA_6968366 (99.79%)	pepA_32262923 (55.48%)	pepA_2313690 (54.84%)	pepA_4155062 (54.64%)	PEPA_34483426 (50.10%)
CJE1008	Cj0930_6968367 (99.46%)	HH1373_32262924 (66.76%)	gtp1_2313689 (65.12%)	jhp0516_4155073 (65.12%)	WS1354_34483427 (68.94%)
CJE1009	argH_6968368 (98.48%)	argH_32263270 (51.86%)			argH_34483301 (57.39%)
CJE1010	pckA_6968369 (99.62%)
CJE1011	pycB_6968370 (97.33%)
CJE1012	Cj0934c_6968371 (98.43%)
CJE1013	Cj0935c_6968372 (100.00%)	HH0811_32262360 (37.81%)	HP0498_2313608 (44.67%)	jhp0450_4154986 (44.90%)	WS0746_34482863 (46.82%)
CJE1014	atpE_6968373 (98.21%)	atpE_32262141 (59.63%)	atpE_2314374 (58.72%)	atpE_4155737 (59.63%)
CJE1015	Cj0937_6968374 (99.67%)	HH1504_32263055 (37.38%)			WS0715_34482840 (45.18%)
CJE1016	aas_6968375 (99.57%)	HH0306_32261853 (60.22%)
CJE1017	Cj0939c_6968376 (100.00%)
CJE1018	glnP_6968377 (98.85%)	glnP_32261893 (35.05%)
CJE1019	Cj0941c_6968378 (99.00%)		HP0787_2313911 (53.79%)	jhp0724_4155280 (54.52%)	WS1259_34483340 (55.39%)
CJE1020	secA_6968379 (99.54%)	secA_32261865 (65.29%)	secA_2313910 (63.29%)	secA_4155279 (63.29%)	SECA_34483339 (64.94%)
CJE1021	Cj0943_6968380 (97.56%)
CJE1022	Cj0944c_6968381 (98.77%)
CJE1023	Cj0945c_6968382 (99.55%)
CJE1024	Cj0946_6968383 (97.77%)
CJE1025	Cj0947c_6968384 (99.66%)	HH0338_32261886 (67.59%)	HP0757_2313883 (60.55%)	jhp0694_4155248 (59.93%)	WS1675_34483706 (70.34%)
CJE1026	Cj0948c_6968385 (100.00%)				WS1661_34483694 (48.26%)
CJE1027	Cj0949c_6968386 (97.23%)	HH1843_32263395 (43.00%)	HP0049_2313129 (45.23%)	jhp0042_4154541 (45.54%)	WS1598_34483637 (41.87%)
CJE1028	Cj0950c_6968387 (95.83%)
CJE1029
CJE1030	Cj0951c_6968388 (93.79%)
CJE1033	purH_6968390 (98.63%)	purH_32262031 (61.40%)			PURH_34483899 (64.90%)
CJE1034	Cj0954c_6968391 (98.58%)
CJE1035	purL_6968392 (97.80%)	purL_32263377 (58.22%)			purL_34482939 (60.06%)
CJE1036	thdF_6968393 (99.32%)	HH0110_32261657 (41.92%)	tdhF_2314627 (42.42%)	thdF_4155957 (42.64%)	thdF_34483365 (45.52%)
CJE1037	Cj0957c_6968394 (99.26%)	HH0111_32261658 (40.37%)	HP1451_2314631 (42.54%)	jhp1344_4155956 (40.28%)
CJE1038	Cj0958c_6968395 (99.24%)				WS1286_34483367 (52.41%)
CJE1039	Cj0959c_6968396 (98.23%)				WS1287_34483368 (52.00%)
CJE1040	rnpA_6968397 (98.15%)
CJE1041	rpmH_6968398 (100.00%)	rpmH_32261663 (90.91%)	HP1447_2314630 (90.91%)	rpmH_4155963 (90.91%)
CJE1042	Cj0962_6968399 (99.37%)
CJE1043	Cj0963_6968400 (99.50%)
CJE1044	Cj0964_6968401 (99.75%)
CJE1045	Cj0965c_6968402 (97.58%)	HH0886_32262435 (41.35%)	HP0496_2313606 (40.91%)	jhp0448_4154984 (40.91%)	WS1261_34483342 (40.80%)
CJE1046
CJE1048
CJE1049
CJE1050
CJE1051
CJE1052
CJE1053	Cj0972_6968407 (99.07%)
CJE1054
CJE1055
CJE1058	Cj0976_6968411 (99.31%)	HH1340_32262891 (51.41%)	HP0419_2313522 (51.22%)	jhp0965_4155549 (50.81%)	WS0668_34482796 (54.69%)
CJE1059	Cj0977_6968412 (100.00%)
CJE1060	Cj0978c_6968413 (98.25%)
CJE1061	Cj0979c_6968414 (98.86%)
CJE1062	Cj0980_6968415 (99.29%)				WS1509_34483561 (40.85%)
CJE1063	Cj0981c_6968416 (98.80%)
CJE1064	Cj0982c_6968417 (99.28%)	HH0738_32262287 (59.49%)	glnH_2314331 (57.79%)	jhp1099_4155688 (58.17%)
CJE1065	Cj0983_6968418 (97.31%)
CJE1066	Cj0984_6968419 (96.75%)	HH1685_32263237 (41.35%)			WS0564_34482698 (37.56%)
CJE1067	hipO_6968420 (98.96%)
CJE1068
CJE1069
CJE1070	Cj0990c_6968425 (99.60%)
CJE1071	Cj0991c_6968426 (99.05%)	HH0974_32262524 (50.93%)	glpC_2313788 (44.73%)	glpC_4155150 (44.26%)	WS1750_34483775 (51.30%)
CJE1072	hemN_6968427 (98.00%)	hemN_1_32262525 (58.90%)	hemN_2313787 (56.80%)	hemN_1_4155149 (56.80%)	HEMN_34483776 (58.46%)
CJE1073	Cj0993c_6968428 (99.39%)
CJE1074	argF_6968429 (97.71%)	argF_32262527 (49.47%)			ARGF_34483778 (52.60%)
CJE1075	hemB_6968430 (99.08%)	hemB_32263158 (62.54%)	hemB_2313250 (64.00%)	hemB_4154663 (65.54%)	HEMB_34483839 (66.87%)
CJE1076	ribA_6968431 (99.46%)	ribA_32261591 (53.89%)	ribA_2313933 (52.63%)	ribA_4155308 (53.97%)	ribA_34483280 (54.05%)
CJE1077	Cj0997_6968432 (96.81%)	gidB_32263037 (39.64%)	gidB_2314206 (40.12%)	gidB_4154892 (38.92%)	gidB_34482977 (35.29%)
CJE1078	Cj0998c_6968433 (98.95%)			jhp0290_4154822 (35.48%)
CJE1079	Cj0999c_6968434 (100.00%)	HH1161_32262711 (45.89%)			WS2204_34484198 (38.35%)
CJE1080	Cj1000_6968435 (99.66%)				WS2203_34484197 (37.11%)
CJE1081	rpoD_6968436 (99.84%)	rpoD_32262093 (69.84%)	rpoD_2313167 (65.64%)	rpoD_4154591 (65.47%)	RPOD_34483904 (71.09%)
CJE1082	Cj1002c_6968437 (99.41%)
CJE1083	Cj1003c_6968438 (100.00%)
CJE1084	Cj1004_6968439 (100.00%)
CJE1085	Cj1005c_6968440 (99.26%)	ftsH_1_32262428 (45.06%)	ftsH_2313382 (43.01%)	ftsH_1_4154795 (42.65%)	WS1514_34483565 (53.22%)
CJE1086	Cj1006c_6968441 (100.00%)	HH0880_32262429 (48.44%)	HP0285_2313381 (50.12%)	jhp0270_4154794 (49.88%)	WS1515_34483566 (52.05%)
CJE1087	Cj1007c_6968442 (99.62%)	HH0881_32262430 (43.93%)	HP0284_2313380 (38.12%)	jhp0269_4154793 (37.72%)	WS1516_34483567 (47.61%)
CJE1088	aroB_6968443 (100.00%)	aroB_32262431 (51.15%)	aroB_2313379 (51.00%)	aroB_4154792 (49.57%)	AROB_34483568 (48.71%)
CJE1089	Cj1009c_6968445 (99.57%)
CJE1090	tgt_6968446 (99.46%)	tgt_32262390 (57.26%)	HP0281_2313378 (56.68%)	tgt_4154790 (56.45%)	TGT_34483570 (56.03%)
CJE1091	Cj1011_6968447 (96.86%)
CJE1092
CJE1093
CJE1094
CJE1095
CJE1096
CJE1097
CJE1098
CJE1099
CJE1100
CJE1101
CJE1102
CJE1103			HP0894_2314031 (44.32%)	jhp0825_4155393 (41.76%)
CJE1104
CJE1105
CJE1106
CJE1107
CJE1108
CJE1109
CJE1110		HH0254_32261801 (55.48%)
CJE1111
CJE1112
CJE1113
CJE1114
CJE1115
CJE1116
CJE1117
CJE1118
CJE1119
CJE1120
CJE1122
CJE1123
CJE1124
CJE1125
CJE1126
CJE1127
CJE1128
CJE1129
CJE1130
CJE1131
CJE1132		HH0032_32261579 (35.86%)
CJE1133
CJE1134
CJE1135
CJE1136		HH0200_32261747 (48.29%)
CJE1137
CJE1138
CJE1139
CJE1141
CJE1142		HH0237_32261784 (60.16%)
CJE1143
CJE1144
CJE1145
CJE1146
CJE1147
CJE1148
CJE1149
CJE1150
CJE1151
CJE1152
CJE1153
CJE1154
CJE1155
CJE1156	Cj1012c_6968448 (97.99%)
CJE1157	Cj1013c_6968449 (99.35%)
CJE1158	livF_6968450 (100.00%)				LIVF_34483527 (66.96%)
CJE1159	livG_6968451 (99.22%)				LIVG_34483528 (64.57%)
CJE1160	livM_6968452 (99.14%)				LIVM_34483529 (66.77%)
CJE1161	livH_6968453 (100.00%)				LIVH_34483530 (62.54%)
CJE1162	livK_6968454 (99.73%)				LIVK_34483531 (43.78%)
CJE1163	livJ_6968455 (98.38%)
CJE1164	Cj1020c_6968456 (100.00%)
CJE1165	Cj1021c_6968457 (100.00%)
CJE1166	Cj1022c_6968458 (100.00%)				WS0369_34482517 (53.61%)
CJE1167	asd_6968459 (99.42%)	asd_32263426 (65.59%)	HP1189_2314350 (51.30%)	asd_4155713 (52.46%)	WS0368_34482516 (70.09%)
CJE1168	Cj1024c_6968460 (99.54%)	flgR_32263187 (52.86%)	HP0703_2313827 (57.11%)	jhp0643_4155196 (57.63%)	WS0367_34482515 (58.53%)
CJE1169	Cj1025c_6968461 (100.00%)
CJE1170	Cj1026c_6968462 (98.83%)			jhp0775_4155342 (39.62%)
CJE1171	gyrA_6968463 (99.54%)	gyrA_32263185 (71.49%)	gyrA_2313826 (58.50%)	gyrA_4155194 (65.65%)	gyrA_34482513 (72.25%)
CJE1172	Cj1028c_6968464 (98.95%)		HP1473_2314665 (38.02%)	jhp1366_4155993 (35.75%)	WS0614_34482745 (39.49%)
CJE1173	mapA_6968465 (100.00%)
CJE1174	lepA_6968466 (99.83%)	lepA_32261648 (73.86%)	lepA_2313456 (74.66%)	lepA_4154850 (74.33%)	LEPA_34483689 (76.51%)
CJE1176	Cj1032_6968468 (99.59%)		mtrC_2313725 (35.48%)	jhp0553_4155091 (35.48%)
CJE1177	Cj1033_6968469 (99.60%)	HH0222_32261769 (37.30%)			HEFC_34483352 (38.24%)
CJE1178	Cj1034c_6968470 (99.63%)
CJE1179	Cj1035c_6968471 (99.58%)	HH1829_32263381 (37.02%)			WS1276_34483357 (44.93%)
CJE1180	Cj1036c_6968472 (98.80%)
CJE1181	pycA_6968473 (100.00%)	HH1849_32263401 (67.67%)			PYCA_34483369 (67.60%)
CJE1182	Cj1038_6968474 (99.22%)	ftsW_2_32261649 (46.09%)	ftsW_2314744 (45.90%)	rodA_2_4156089 (45.90%)	WS1669_34483700 (48.52%)
CJE1183	murG_6968475 (99.71%)	murG_32262476 (45.00%)	murG_2314307 (48.39%)	murG_4155666 (48.39%)	MURG_34482472 (50.76%)
CJE1184	Cj1040c_6968476 (98.97%)	HH0865_32262414 (46.25%)
CJE1185	Cj1041c_6968477 (99.29%)
CJE1186	Cj1042c_6968478 (100.00%)
CJE1187	Cj1043c_6968479 (100.00%)
CJE1188	thiH_6968480 (99.74%)
CJE1189	thiG_6968481 (98.45%)	thiG_32263403 (44.53%)			thiG_34483058 (44.79%)
CJE1190	moeB_6968482 (97.38%)
CJE1191	Cj1047c_6968483 (100.00%)
CJE1192	dapE_6968484 (98.36%)	dapE_32263357 (50.56%)	dapE_2313302 (48.94%)	dapE_4154719 (49.03%)	WS0588_34482720 (54.29%)
CJE1193	Cj1049c_6968485 (98.49%)
CJE1194	Cj1050c_6968486 (97.00%)	HH0572_32262120 (40.08%)		jhp1180_4155790 (46.67%)
CJE1195	Cj1051c_6968487 (74.85%)
CJE1196	mutS_6968488 (98.91%)	mutS_32261923 (43.55%)	MutS_2313742 (44.31%)	mutS_4155104 (42.91%)	MUTS_34483543 (47.66%)
CJE1197	Cj1053c_6968489 (99.14%)
CJE1198	murC_6968490 (96.75%)	murC_32261921 (49.20%)	murC_2313743 (52.78%)	murC_4155106 (52.31%)	MURC_34483541 (55.45%)
CJE1199	Cj1056c_6968492 (98.84%)	HH1352_32262903 (42.19%)	HP1481_2314668 (39.17%)	jhp1374_4155983 (37.92%)	WS1891_34483905 (45.31%)
CJE1200	Cj1057c_6968493 (100.00%)				WS1892_34483906 (43.64%)
CJE1201	guaB_6968494 (99.59%)	guaB_32262251 (68.75%)	guaB_2313963 (67.92%)	guaB_4155333 (68.12%)	GUAB_34483909 (71.78%)
CJE1202	gatA_6968495 (98.68%)	gatA_32262250 (59.38%)	gatA_2313964 (60.89%)	gatA_4155334 (60.00%)	GATA_34483910 (59.87%)
CJE1203	Cj1060c_6968496 (97.22%)
CJE1204	ileS_6968497 (98.91%)	ileS_32262740 (55.48%)	ileS_2314596 (49.25%)	ileS_4155922 (49.46%)	ILES_34482338 (57.95%)
CJE1205	Cj1062_6968498 (98.90%)
CJE1206	Cj1063_6968499 (100.00%)
CJE1209	rdxA_6968500 (97.51%)				WS1508_34483560 (38.00%)
CJE1210	pgsA_6968501 (99.44%)	pgsA_32263232 (48.86%)	pgsA_2314161 (43.93%)	pgsA_4154944 (45.09%)	PGSA_34481790 (48.57%)
CJE1211	Cj1068_6968502 (99.46%)	HH1681_32263233 (46.55%)	HP0258_2313352 (39.60%)	jhp0242_4154773 (39.94%)	WS2224_34481791 (46.24%)
CJE1212	Cj1069_6968503 (99.65%)
CJE1213	rpsF_6968504 (99.20%)	rpsF_32262084 (57.85%)	rps6_2314412 (54.47%)	rpsF_4155764 (53.66%)	WS1873_34483887 (50.00%)
CJE1214	ssb_6968505 (98.91%)	ssb_32262085 (42.39%)	HP1245_2314411 (42.37%)	ssb_4155774 (42.37%)	SSB_34483886 (47.09%)
CJE1215	rpsR_6968506 (100.00%)		HP1244_2314410 (75.61%)	rpsR_4155773 (75.61%)	RPSR_34483885 (77.38%)
CJE1216	lon_6968507 (99.75%)	lon_32262394 (54.95%)			WS1972_34483979 (60.90%)
CJE1217	Cj1074c_6968508 (99.53%)	comL_32262393 (37.80%)			WS1973_34483980 (42.79%)
CJE1218	Cj1075_6968509 (100.00%)	HH0843_32262392 (44.19%)	HP1377_2314555 (41.73%)	jhp1291_4155903 (42.52%)	WS1651_34483685 (43.41%)
CJE1219	proC_6968510 (99.59%)	proC_32262391 (35.56%)	proC_2314308 (36.22%)	proC_4155682 (37.01%)	PROC_34483982 (38.71%)
CJE1220	Cj1077_6968511 (100.00%)
CJE1221	Cj1078_6968512 (100.00%)
CJE1222	Cj1079_6968513 (100.00%)
CJE1223	Cj1080c_6968514 (99.04%)
CJE1224	thiE_6968515 (99.52%)		thiB_2313974 (38.89%)	thiE_4155348 (38.97%)	WS0788_34482903 (36.41%)
CJE1225	thiD_6968516 (97.78%)		HP0844_2313975 (42.75%)	thiD_4155349 (42.75%)
CJE1226	Cj1083c_6968517 (96.05%)		HP0602_2313723 (40.76%)	jhp0549_4155087 (40.28%)	WS1507_34483559 (36.17%)
CJE1227	Cj1084c_6968518 (100.00%)	HH1563_32263114 (39.52%)			WS0339_34482488 (53.06%)
CJE1228	mfd_6968519 (99.80%)	mfd_32262006 (49.00%)	trcF_2314723 (48.29%)	mfd_4156075 (47.84%)	MFD_34483321 (52.37%)
CJE1229	Cj1086c_6968520 (100.00%)	HH0459_32262007 (42.06%)	HP1542_2314731 (39.83%)	jhp1457_4156076 (41.53%)
CJE1230	Cj1087c_6968521 (99.33%)	HH0460_32262008 (39.25%)	tagE_2314724 (36.88%)	jhp1456_4156077 (38.08%)	WS1241_34483323 (42.32%)
CJE1231	folC_6968522 (98.72%)	folC_32262010 (37.72%)	folC_2314726 (43.18%)	folC_4156079 (42.42%)	FOLC_34483324 (36.78%)
CJE1232	Cj1089c_6968523 (98.71%)
CJE1233	Cj1090c_6968524 (98.82%)				WS1244_34483326 (39.35%)
CJE1234	leuS_6968525 (99.38%)	leuS_32262013 (60.29%)	leuS_2314727 (62.66%)	leuS_4156066 (62.61%)	leuS_34483327 (61.66%)
CJE1235	secF_6968526 (99.69%)	secF_32263200 (48.45%)	secF_2314729 (43.34%)	secF_4156068 (43.03%)	SECF_34483329 (49.54%)
CJE1236	secD_6968527 (98.86%)		secD_2314730 (54.26%)	secD_4156069 (54.11%)	SECD_34483330 (57.80%)
CJE1237	Cj1094c_6968528 (100.00%)	HH1646_32263198 (60.71%)		jhp1448_4156070 (60.71%)	WS1249_34483331 (61.45%)
CJE1238	Cj1095_6968529 (99.32%)
CJE1239	metK_6968530 (100.00%)	metK_32263091 (42.21%)	metX_2313288 (40.70%)	metK_4154690 (41.21%)	metX_34484000 (42.07%)
CJE1240	Cj1097_6968531 (100.00%)
CJE1241	pyrB_6968532 (99.32%)	pyrB_32262069 (57.09%)	pyrB_2314233 (52.81%)	pyrB_4154863 (53.47%)	PYRB_34482712 (65.17%)
CJE1242	Cj1099_6968533 (98.60%)	pepF_32263362 (50.00%)	pepF_2313574 (53.15%)	pepF_4154958 (53.32%)	WS1038_34483139 (53.86%)
CJE1243	Cj1100_6968534 (96.55%)				WS1039_34483140 (38.22%)
CJE1244	Cj1101_6968535 (99.71%)	HH1358_32262909 (50.86%)	uvrD_2314653 (43.59%)	rep_4155998 (40.84%)	WS0876_34482985 (50.43%)
CJE1245	truB_6968536 (97.79%)	truB_32261671 (46.15%)			truB_34482987 (45.99%)
CJE1246	csrA_6968537 (100.00%)	HH0123_32261670 (42.67%)	csrA_2314614 (46.67%)	csrA_4155945 (45.33%)	csrA_34482988 (57.89%)
CJE1247	Cj1104_6968538 (100.00%)				WS0881_34482989 (38.06%)
CJE1248	smpB_6968539 (99.33%)	smpB_32261668 (58.39%)	smpB_2314616 (55.03%)	jhp1337_4155947 (55.70%)	SMPB_34482990 (68.24%)
CJE1249	Cj1106_6968540 (99.00%)
CJE1250	Cj1107_6968541 (100.00%)	HH1565_32263116 (50.00%)	HP0032_2313107 (38.20%)	jhp0028_4154533 (41.57%)	WS0336_34482485 (46.24%)
CJE1251	clpA_6968542 (99.15%)		clpA_2313108 (46.18%)	clpA_4154534 (44.05%)	WS0337_34482486 (48.43%)
CJE1252	aat_6968543 (99.07%)				WS0338_34482487 (36.63%)
CJE1253	Cj1110c_6968544 (99.30%)
CJE1254	Cj1111c_6968545 (100.00%)
CJE1255	Cj1112c_6968546 (99.16%)	HH1416_32262967 (67.24%)
CJE1256	Cj1113_6968547 (96.98%)	HH0328_32261876 (55.07%)
CJE1257	pssA_6968548 (99.59%)	pssA_32262369 (54.47%)	pssA_2314220 (50.88%)	pssA_4154884 (50.88%)	PSSA_34482754 (51.93%)
CJE1258	Cj1115c_6968549 (97.07%)
CJE1259	ftsH_6968550 (99.69%)	ftsH_2_32262371 (68.09%)	ftsH_2314219 (67.68%)	ftsH_2_4154882 (67.68%)	FTSH_34482752 (71.50%)
CJE1260	prmA_6968551 (99.29%)				PRMA_34482751 (40.29%)
CJE1261	cheY_6968552 (100.00%)	cheY_32262374 (81.82%)	cheY_2314217 (83.61%)	cheY_4154896 (84.43%)	CHEY_34482750 (84.30%)
CJE1262	wlaM_6968553 (99.66%)		HP0158_2313245 (37.58%)	jhp0146_4154659 (36.60%)	WS0616_34482747 (46.23%)
CJE1263	wlaL_6968554 (100.00%)				PGLF_34482207 (48.46%)
CJE1264	wlaK_6968555 (100.00%)
CJE1265	wlaI_6968557 (99.48%)				PGLB_34482209 (36.95%)
CJE1266	wlaH_6968558 (98.00%)				WCGN_34482210 (63.32%)
CJE1267	wlaG_6968559 (98.40%)				WLAG_34482211 (41.05%)
CJE1268	wlaF_6968560 (99.30%)				WLAF_34482213 (38.30%)
CJE1269	wlaE_6968561 (98.90%)				WLAE_34482214 (40.80%)
CJE1270	wlaD_6968562 (99.03%)
CJE1271	wlaC_6968563 (96.93%)
CJE1272	wlaB_6968564 (98.94%)		hetA_2314367 (38.43%)	jhp1129_4155732 (39.15%)	WLAB_34482221 (48.94%)
CJE1273	galE_6968565 (99.09%)	galE_32261928 (53.25%)	HP0360_2313462 (49.41%)	galE_4155609 (50.29%)
CJE1274	Cj1132c_6968566 (97.73%)			jhp0628_4155184 (45.16%)	WS0615_34482746 (49.81%)
CJE1275	waaC_6968567 (98.83%)		rfaC_2313369 (39.38%)	waaC_4154785 (38.11%)
CJE1276	htrB_6968568 (97.63%)
CJE1277	Cj1135_6968569 (86.02%)	HH0773_32262322 (63.46%)
CJE1278
CJE1279	Cj1138_6968572 (39.52%)
CJE1280	Cj1139c_6968573 (48.22%)
CJE1281
CJE1282	waaV_6968580 (92.19%)
CJE1283	waaF_6968581 (92.65%)				WS1450_34483512 (35.65%)
CJE1284		HH0323_32261871 (40.60%)
CJE1285	gmhA_6968582 (96.77%)	gmhA_32263082 (61.20%)	gmhA_2313989 (61.62%)	gmhA_4155355 (60.54%)	GMHA_34482809 (57.84%)
CJE1286	waaE_6968583 (95.88%)	HH1532_32263083 (49.74%)	rfaE_2313990 (51.09%)	waaE_4155356 (51.31%)	WAAE_34482808 (51.50%)
CJE1287	waaD_6968584 (98.42%)	HH1533_32263084 (48.30%)	rfaD_2313991 (48.26%)	gmhD_4155357 (47.34%)	GMHD_34482807 (52.65%)
CJE1288	Cj1152c_6968585 (95.38%)	HH1534_32263085 (50.92%)	HP0860_2313992 (46.82%)	jhp0794_4155358 (47.34%)	WS0678_34482806 (47.10%)
CJE1289	Cj1153_6968586 (100.00%)				WS0700_34482826 (38.00%)
CJE1290	Cj1154c_6968587 (100.00%)				FIXS_34482475 (38.10%)
CJE1291	Cj1155c_6968588 (99.23%)		copA_2314677 (36.20%)	fixI_4156001 (36.53%)	WS2171_34484166 (43.02%)
CJE1292	rho_6968589 (100.00%)	rho_32261570 (72.88%)	HP0550_2313666 (73.19%)	rho_4155037 (73.66%)	RHO_34482924 (77.83%)
CJE1293	dnaX_6968590 (97.84%)		dnaX_2313841 (44.16%)		DNAX_34484098 (51.31%)
CJE1295	Cj1161c_6968594 (98.28%)
CJE1296	Cj1162c_6968595 (100.00%)
CJE1297	Cj1163c_6968596 (99.68%)
CJE1298	Cj1164c_6968597 (100.00%)
CJE1299	Cj1165c_6968598 (100.00%)
CJE1300	Cj1166c_6968599 (99.22%)
CJE1301	ldh_6968600 (98.05%)
CJE1302	Cj1168c_6968601 (95.98%)	HH0041_32261588 (47.09%)			WS0291_34482441 (55.96%)
CJE1303	Cj1169c_6968602 (100.00%)
CJE1304	Cj1170c_6968603 (91.08%)
CJE1305	ppi_6968604 (100.00%)	ppiA_32263167 (59.51%)	HP1441_2314613 (57.89%)	ppiA_4155944 (58.55%)	PPIA_34482511 (62.67%)
CJE1306	Cj1172c_6968605 (100.00%)	yebC_32263156 (58.59%)	HP0162_2313249 (58.09%)	jhp0149_4154662 (58.51%)	WS1016_34483119 (66.53%)
CJE1307	Cj1173_6968606 (98.23%)	HH0509_32262057 (40.78%)
CJE1308	Cj1174_6968607 (100.00%)	HH0508_32262056 (48.51%)
CJE1309	argS_6968608 (99.43%)	argS_32262258 (56.52%)	argS_2313419 (50.93%)	argS_4154833 (50.37%)	ARGS_34482346 (58.29%)
CJE1310	Cj1176c_6968609 (100.00%)	HH0708_32262257 (53.42%)	HP0320_2313428 (49.37%)	jhp0303_4154834 (49.37%)	WS0187_34482347 (52.50%)
CJE1311	gmk_6968610 (99.51%)	gmk_32262256 (51.50%)	HP0321_2313420 (51.00%)	gmk_4154835 (51.00%)	WS0188_34482348 (48.89%)
CJE1312	Cj1178c_6968611 (98.17%)
CJE1313	fliR_6968612 (99.21%)	fliR_32262253 (44.92%)	fliR_2313256 (39.37%)	fliR_4154675 (39.37%)	WS0191_34482351 (45.34%)
CJE1314	Cj1180c_6968613 (98.58%)	ybbA_32262551 (53.47%)	HP0179_2313268 (49.51%)	jhp0167_4154682 (49.02%)	WS0192_34482352 (52.43%)
CJE1315	tsf_6968614 (99.16%)	tfs_32262621 (58.26%)	HP1555_2314738 (54.62%)	tfs_4156074 (54.90%)	TSF_34482353 (56.86%)
CJE1316	rpsB_6968615 (99.62%)	rpsB_32262622 (69.02%)	rps2_2314737 (69.06%)	rpsB_4156073 (69.70%)	RPSB_34482354 (72.83%)
CJE1317	cfa_6968616 (93.02%)		HP0416_2313520 (60.10%)	cfa_4155557 (60.36%)
CJE1318	petC_6968617 (99.73%)
CJE1319	petB_6968618 (100.00%)	HH1006_32262556 (69.49%)	fbcH_2314721 (70.87%)	petB_4156093 (70.15%)	CYTB_34484151 (71.98%)
CJE1320	petA_6968619 (100.00%)	HH1007_32262557 (62.89%)	fbcF_2314722 (56.79%)	petA_4156094 (55.56%)	PETA_34484150 (66.47%)
CJE1321	arsB_6968620 (99.53%)	HH1424_32262975 (46.64%)			ARSB_34482869 (38.75%)
CJE1322	gidA_6968621 (99.84%)	gidA_32261560 (58.97%)	gidA_2313303 (58.31%)	gidA_4154720 (58.70%)	gidA_34482929 (60.42%)
CJE1323	Cj1189c_6968622 (100.00%)				WS1673_34483704 (45.96%)
CJE1324	Cj1190c_6968623 (99.35%)				WS1672_34483703 (35.60%)
CJE1325	Cj1191c_6968624 (96.95%)
CJE1326	dctA_6968625 (99.77%)				DCTA_34482546 (62.44%)
CJE1327	Cj1193c_6968626 (98.88%)
CJE1328	Cj1194_6968627 (99.61%)
CJE1329	pyrC2_6968628 (99.23%)				PYRC2_34483537 (38.17%)
CJE1330	gpsA_6968629 (100.00%)	gpsA_32262343 (48.05%)	HP0961_2314097 (51.45%)	gpsA_4155460 (51.45%)	WS2004_34484010 (53.58%)
CJE1331	gatB_6968630 (98.73%)	gatB_32262345 (70.19%)	gatB_2313783 (64.48%)	gatB_4155155 (64.19%)	GATB_34484011 (71.94%)
CJE1332	Cj1198_6968631 (98.17%)	ygaG_32261723 (70.55%)	HP0105_2313188 (39.31%)	jhp0097_4154616 (39.31%)	WS2126_34484128 (71.60%)
CJE1333	Cj1199_6968632 (98.79%)
CJE1334	Cj1200_6968633 (97.33%)
CJE1335	metE_6968634 (99.20%)	metE_32262401 (47.61%)			metE_34482422 (44.33%)
CJE1336	metF_6968635 (98.58%)
CJE1337	Cj1203c_6968636 (100.00%)
CJE1338	atpB_6968637 (99.56%)	atpB_32263048 (60.09%)	atpB_2313962 (57.85%)	atpB_4155332 (57.85%)	ATPB_34482468 (69.30%)
CJE1339	radA_6968638 (99.33%)	HH0591_32262139 (61.16%)	HP0223_2313313 (55.13%)	radA_4154730 (55.36%)	RADA_34482243 (61.38%)
CJE1340	ftsY_6968639 (99.31%)	ftsY_32262138 (50.85%)	ftsY_2313887 (48.99%)	ftsY_4155255 (48.81%)	FTSY_34482242 (51.86%)
CJE1341	Cj1207c_6968640 (98.92%)				WS0073_34482241 (42.39%)
CJE1342	Cj1208_6968641 (99.52%)				WS0072_34482240 (35.24%)
CJE1343	Cj1209_6968642 (99.81%)	HH0587_32262135 (58.95%)	HP0760_2313886 (45.48%)	jhp0697_4155263 (43.30%)	WS0071_34482239 (66.53%)
CJE1344	Cj1210_6968643 (100.00%)	HH1000_32262550 (40.54%)	HP1162_2314320 (35.59%)	jhp1089_4155686 (36.16%)	WS1799_34483820 (47.03%)
CJE1345	Cj1211_6968644 (99.76%)			comEC_4155880 (35.25%)	COMEC_34482504 (36.95%)
CJE1346	rbn_6968645 (100.00%)	rbn_32263282 (37.94%)			RBN_34483554 (36.95%)
CJE1347	glcD_6968646 (99.57%)	glcD_32262418 (70.04%)	glcD_2313619 (65.86%)	glcD_4154999 (65.00%)	GLCD_34482420 (68.28%)
CJE1348	Cj1214c_6968647 (99.15%)
CJE1349
CJE1350	Cj1215_6968648 (99.48%)	HH0872_32262421 (43.55%)	HP0506_2313617 (44.03%)	jhp0456_4154996 (46.11%)	WS0264_34482417 (46.80%)
CJE1351	Cj1216c_6968649 (97.01%)
CJE1352	Cj1217c_6968650 (97.79%)
CJE1353	ribA_6968651 (96.06%)	ribC_32262872 (43.40%)	ribC_2314759 (48.06%)	ribC_4156116 (49.28%)	RIBA_34484078 (54.19%)
CJE1354	Cj1219c_6968652 (97.04%)
CJE1355	groES_6968653 (100.00%)	hspA_32262750 (64.04%)			WS0309_34482459 (58.43%)
CJE1356	groEL_6968654 (99.82%)	hspB_32262751 (76.33%)	HP0010_2313084 (76.05%)	groEL_4154502 (75.87%)	GROEL_34482458 (80.15%)
CJE1357	Cj1222c_6968655 (99.75%)				WS0078_34482246 (39.56%)
CJE1358	Cj1223c_6968656 (100.00%)	HH1656_32263208 (63.35%)	HP1365_2314531 (39.38%)	jhp1283_4165002 (38.18%)	WS0077_34482245 (63.64%)
CJE1359	Cj1224_6968657 (98.99%)	HH0005_32261552 (43.59%)
CJE1360	Cj1225_6968658 (100.00%)
CJE1361	Cj1226c_6968659 (100.00%)
CJE1362	Cj1227c_6968660 (100.00%)	HH1608_32263160 (52.73%)			WS1817_34483835 (55.51%)
CJE1363	htrA_6968661 (99.79%)	htrA_32262002 (49.37%)	htrA_2314163 (49.89%)	htrA_4154933 (49.48%)	HTRA_34481793 (50.54%)
CJE1364	cbpA_6968662 (98.99%)	cbpA_32263194 (54.70%)	CbpA_2314166 (52.36%)	dnaJ_1_4154938 (52.36%)	WS1253_34483334 (54.52%)
CJE1365	hspR_6968663 (98.39%)	hspR_32263193 (60.50%)	hspR_2314167 (63.33%)	jhp0399_4154930 (62.50%)	WS1254_34483335 (63.64%)
CJE1366	kefB_6968664 (99.82%)				KEFB_34483138 (43.27%)
CJE1367	Cj1232_6968665 (99.09%)
CJE1368	Cj1233_6968666 (99.51%)
CJE1369	glyS_6968667 (99.85%)	glyS_32262617 (44.98%)	glyS_2314109 (44.44%)	glyS_4155477 (44.61%)	GLYS_34482366 (44.23%)
CJE1370	Cj1235_6968668 (97.07%)	HH0011_32261558 (41.13%)
CJE1371	Cj1236_6968669 (97.15%)
CJE1372	Cj1237c_6968670 (98.46%)
CJE1373	pdxJ_6968671 (99.22%)	pdxJ_32262411 (46.90%)	pdxJ_2314765 (45.25%)	pdxJ_4156112 (45.25%)	pdxJ_34482271 (52.69%)
CJE1374	pdxA_6968672 (97.25%)
CJE1375
CJE1376
CJE1377	Cj1241_6968674 (99.50%)	HH0694_32262243 (55.32%)
CJE1378	Cj1242_6968675 (100.00%)
CJE1379	hemE_6968676 (99.41%)	hemE_32263425 (64.52%)	hemE_2313724 (64.12%)	hemE_4155089 (64.41%)	HEME_34482518 (61.88%)
CJE1380	Cj1244_6968677 (99.67%)	HH1831_32263383 (41.61%)	HP0117_2313199 (40.47%)	jhp0109_4154625 (40.86%)	WS0374_34482522 (45.67%)
CJE1381	Cj1245c_6968678 (99.25%)
CJE1382	uvrC_6968679 (98.83%)		uvrC_2313951 (46.13%)	uvrC_4155322 (46.72%)	UVRC_34483645 (48.18%)
CJE1383	Cj1247c_6968680 (98.17%)
CJE1384
CJE1385	guaA_6968681 (98.24%)		guaA_2313515 (62.55%)	guaA_4155553 (63.53%)	GUAA_34483642 (67.32%)
CJE1386	Cj1249_6968682 (99.38%)
CJE1387	purD_6968683 (100.00%)	purD_32262146 (50.95%)	purD_2314378 (38.19%)	purD_4155729 (37.95%)	PURD_34483000 (57.04%)
CJE1388	Cj1251_6968684 (100.00%)				WS0895_34483001 (38.41%)
CJE1389	Cj1252_6968685 (99.56%)
CJE1390	pnp_6968686 (98.61%)	pnp_32262142 (50.61%)	HP1213_2314375 (46.55%)	pnp_4155738 (46.55%)	PNP_34483005 (58.98%)
CJE1391	Cj1254_6968687 (94.38%)	HH0341_32261889 (48.48%)
CJE1392	Cj1256c_6968689 (99.09%)
CJE1394	Cj1258_6968691 (98.01%)
CJE1395	porA_6968692 (72.83%)
CJE1396	dnaJ_6968693 (99.20%)	dnaJ_2_32263070 (54.28%)	dnaJ_2314497 (50.13%)	dnaJ_2_4155852 (49.87%)	dnaJ_34482824 (54.16%)
CJE1397	racR_6968694 (100.00%)		ompR_2313252 (52.02%)	jhp0152_4154653 (51.57%)
CJE1398	racS_6968695 (99.27%)				WS1818_34483836 (35.78%)
CJE1399	recR_6968696 (98.95%)	recR_32263069 (44.44%)	recR_2314062 (42.70%)	recR_4155437 (41.62%)	RECR_34482825 (51.58%)
CJE1400	hydD_6968697 (100.00%)	hyaD_32261606 (49.16%)	hydD_2313752 (42.70%)	hyaD_4155118 (43.26%)	HYAD_34483714 (46.93%)
CJE1401	hydC_6968698 (99.57%)		hydC_2313751 (41.12%)	hyaC_4155117 (42.99%)	HYAC_34483715 (50.00%)
CJE1402	hydB_6968699 (99.65%)	hyaB_32261604 (67.78%)	hydB_2313750 (64.63%)	hyaB_4155116 (63.94%)	WS1686_34483716 (65.32%)
CJE1403	hydA_6968700 (99.44%)	hyaA_32261603 (73.16%)	hydA_2313749 (69.92%)	hyaA_4155126 (69.36%)	HYDA_34483717 (75.90%)
CJE1404	Cj1268c_6968701 (97.72%)
CJE1405	amiA_6968702 (98.94%)
CJE1406	Cj1270c_6968703 (100.00%)	HH0829_32262378 (61.94%)	HP0773_2313904 (61.11%)	jhp0710_4155266 (61.67%)	WS0242_34482397 (61.39%)
CJE1407	tyrS_6968704 (99.00%)	tyrS_32262379 (61.96%)	tyrS_2313900 (57.00%)	tyrS_4155267 (56.42%)	TYRS_34482396 (62.81%)
CJE1408	spoT_6968705 (99.73%)	spoT_32262380 (45.73%)			SPOT_34482395 (50.14%)
CJE1409	rpoZ_6968706 (100.00%)	rpoZ_32262381 (50.00%)	HP0776_2313905 (46.48%)	jhp0713_4155269 (46.48%)	WS0239_34482394 (50.00%)
CJE1410	pyrH_6968707 (99.58%)	pyrH_32262382 (73.19%)	pyrH_2313902 (69.36%)	pyrH_4155270 (68.94%)	PYRH_34482393 (75.95%)
CJE1411	Cj1275c_6968708 (98.74%)		HP0750_2313879 (35.60%)	jhp0687_4155241 (35.84%)
CJE1412	Cj1276c_6968709 (98.88%)				WS0147_34482309 (38.86%)
CJE1413	Cj1277c_6968710 (99.55%)	ftsE_32262335 (57.27%)	ftsE_2313874 (54.75%)	jhp0685_4155239 (54.75%)	WS0146_34482308 (59.46%)
CJE1414	Cj1278c_6968711 (99.49%)				WS0145_34482307 (36.44%)
CJE1415	Cj1279c_6968712 (98.29%)				WS0144_34482306 (37.14%)
CJE1416	Cj1280c_6968713 (98.76%)	HH0783_32262332 (45.15%)	HP0745_2313872 (52.98%)	jhp0682_4155249 (52.06%)	WS0143_34482305 (50.16%)
CJE1417	mrdB_6968714 (99.45%)	ftsW_1_32262331 (48.60%)	mreB_2313871 (52.79%)	rodA_1_4155225 (52.79%)	MRDB_34482304 (60.61%)
CJE1418
CJE1419
CJE1420
CJE1421
CJE1422
CJE1423
CJE1424
CJE1425
CJE1426
CJE1427
CJE1428
CJE1429
CJE1430
CJE1431
CJE1432
CJE1433
CJE1434
CJE1435
CJE1436
CJE1437
CJE1438
CJE1439
CJE1440
CJE1441
CJE1442
CJE1443
CJE1444
CJE1445
CJE1446
CJE1447
CJE1448
CJE1449
CJE1450
CJE1451
CJE1452
CJE1453
CJE1454
CJE1455
CJE1456
CJE1457
CJE1458
CJE1459
CJE1460
CJE1461
CJE1462
CJE1463
CJE1464
CJE1465
CJE1466
CJE1467
CJE1468
CJE1469
CJE1470
CJE1471
CJE1472
CJE1473
CJE1474
CJE1475	ktrB_6968715 (98.88%)				KTRB_34483448 (49.32%)
CJE1476	ktrA_6968716 (100.00%)	ktrA_32262756 (36.84%)			KTRA_34483447 (46.79%)
CJE1477	Cj1285c_6968717 (99.10%)	HH0884_32262433 (44.44%)	HP0778_2313912 (46.76%)	jhp0715_4155271 (47.22%)	WS0245_34482400 (44.19%)
CJE1478	upp_6968718 (99.04%)				WS1653_34483687 (50.50%)
CJE1480	gltX2_6968720 (99.14%)	gltX_32262475 (55.87%)	gltX_2313587 (58.26%)	gltX_1_4154965 (58.48%)	WS2217_34481784 (57.68%)
CJE1481	Cj1289_6968721 (98.15%)
CJE1482	accC_6968724 (99.32%)	accC_32261742 (67.72%)	accC_2313468 (67.27%)	accC_4155591 (66.82%)	WS1074_34483172 (67.88%)
CJE1483	accB_6968725 (100.00%)	accB_32261741 (51.90%)	fabE_2313469 (41.40%)	accB_4155592 (41.98%)	ACCB_34483171 (48.70%)
CJE1484	dcd_6968726 (98.92%)	HH0193_32261740 (76.16%)	HP0372_2313476 (71.43%)	dcd_4155593 (71.43%)	DCD_34483170 (82.80%)
CJE1485	Cj1293_6968727 (98.80%)	flmA_32262884 (67.38%)	HP0840_2313972 (64.02%)	jhp0778_4155345 (63.72%)	WS2061_34484065 (67.69%)
CJE1486	Cj1294_6968728 (96.01%)		HP0366_2313467 (44.20%)	jhp1015_4155598 (45.11%)	WS1076_34483174 (50.00%)
CJE1487	Cj1295_6968729 (95.21%)
CJE1488	Cj1298_6968732 (69.08%)
CJE1489	acpP2_6968733 (86.76%)	HH0087_32261634 (49.30%)
CJE1490	Cj1300_6968734 (60.33%)
CJE1491	Cj1302_6968736 (98.46%)	HH0084_32261631 (47.84%)
CJE1492	fabH2_6968737 (99.15%)
CJE1493	acpP3_6968738 (100.00%)
CJE1494
CJE1495
CJE1496	Cj1307_6968741 (98.01%)
CJE1497
CJE1498
CJE1499	acpP4_6968742 (83.78%)
CJE1500
CJE1501
CJE1502	Cj1296_6968730 (45.28%)
CJE1503
CJE1504	Cj1310c_6968744 (80.85%)
CJE1506	neuA2_6968745 (97.41%)	neuA_32262449 (44.59%)			WS2106_34484108 (43.69%)
CJE1507	Cj1312_6968746 (99.64%)
CJE1508	Cj1313_6968747 (88.54%)
CJE1509	Cj1314c_6968748 (97.58%)
CJE1510	Cj1315c_6968749 (99.50%)	hisH_32262033 (45.58%)			WS0617_34482748 (42.44%)
CJE1511	Cj1316c_6968750 (99.74%)
CJE1512	neuB3_6968751 (97.08%)	HH0908_32262457 (47.60%)	HP0178_2313267 (50.46%)	neuB_4154681 (49.24%)	WS2109_34484111 (48.48%)
CJE1513	Cj1319_6968753 (99.07%)
CJE1514	Cj1320_6968754 (98.42%)				wlaK_34482208 (35.33%)
CJE1515
CJE1516	neuB2_6968761 (98.20%)
CJE1517	neuC2_6968762 (98.44%)
CJE1518	Cj1329_6968763 (99.12%)
CJE1519	Cj1330_6968764 (95.35%)
CJE1520	ptmB_6968765 (97.87%)
CJE1521	ptmA_6968766 (98.44%)
CJE1522	Cj1333_6968767 (87.75%)		HP0114_2313202 (35.58%)	jhp0106_4154613 (36.22%)
CJE1523	Cj1334_6968768 (98.71%)
CJE1524	Cj1318_6968752 (82.64%)
CJE1525	Cj1337_6968771 (96.97%)	HH1795_32263347 (36.56%)			WS2199_34484193 (36.18%)
CJE1526	flaB_6968772 (93.37%)
CJE1527
CJE1528	flaA_6968773 (92.15%)
CJE1529	Cj1340c_6968774 (90.58%)
CJE1530	Cj1341c_6968775 (90.08%)
CJE1531	Cj1342c_6968776 (95.87%)
CJE1532	Cj1343c_6968777 (100.00%)
CJE1533	Cj1344c_6968778 (100.00%)	gcp_32263394 (43.83%)	HP1584_2314767 (51.92%)	ydiE_4156114 (51.03%)	WS1600_34483639 (53.68%)
CJE1534	Cj1345c_6968779 (99.57%)		HP1075_2314222 (41.41%)	jhp0350_4154876 (42.12%)	WS0230_34482386 (42.86%)
CJE1535	dxr_6968780 (99.16%)	dxr_32262072 (45.53%)	HP0216_2313306 (46.43%)	jhp0202_4154714 (45.98%)	WS0812_34482926 (46.50%)
CJE1536	cdsA_6968781 (99.17%)	cdsA_32262071 (46.91%)	cdsA_2313305 (38.84%)	cdsA_4154722 (38.43%)	CDSA_34482927 (39.75%)
CJE1537	Cj1348c_6968782 (100.00%)	HH1193_32262743 (36.61%)
CJE1538	Cj1349c_6968783 (99.77%)				WS1621_34483656 (35.70%)
CJE1539	mobA_6968784 (100.00%)				mobA_34484013 (35.14%)
CJE1540	pldA_6968785 (98.78%)
CJE1541	ceuB_6968786 (99.07%)
CJE1542	ceuC_6968787 (99.36%)
CJE1543	ceuD_6968788 (99.20%)
CJE1545	Cj1356c_6968790 (98.37%)	HH1170_32262720 (36.70%)
CJE1546	Cj1357c_6968791 (99.84%)	HH0217_32261764 (74.49%)
CJE1547	Cj1358c_6968792 (100.00%)	HH0215_32261762 (63.98%)			NRFH_34483074 (37.27%)
CJE1548	ppk_6968793 (99.86%)	ppk_32262043 (53.84%)	HP1010_2314153 (47.27%)	ppk_4154945 (47.56%)	WS1949_34483959 (59.39%)
CJE1550
CJE1551
CJE1552
CJE1553	Cj1361c_6968795 (100.00%)
CJE1554	ruvB_6968796 (99.40%)	ruvB_32262054 (69.73%)	ruvB_2314203 (69.85%)	ruvB_4154888 (69.25%)	RUVB_34483843 (68.06%)
CJE1555	amaA_6968797 (99.42%)	HH0635_32262184 (35.71%)			AMAA_34483842 (36.94%)
CJE1556	fumC_6968798 (98.70%)		fumC_2314492 (76.89%)	fumC_4155857 (76.24%)
CJE1557	Cj1365c_6968799 (99.62%)
CJE1558	glmS_6968800 (99.50%)	glmS_32262403 (60.00%)	glmS_2314711 (52.31%)	glmS_4156041 (52.48%)	GLMS_34482194 (63.35%)
CJE1559	Cj1367c_6968801 (99.49%)
CJE1560	Cj1368_6968802 (99.72%)	HH1021_32262571 (58.40%)	HP0654_2313779 (57.66%)	jhp0599_4155151 (57.94%)	WS2177_34484172 (64.59%)
CJE1561	Cj1369_6968803 (99.77%)		HP1175_2314333 (50.57%)	jhp1102_4155691 (50.34%)	WS2176_34484171 (53.33%)
CJE1562	Cj1370_6968804 (100.00%)		HP0735_2313857 (40.00%)	gpt_4155234 (40.00%)	WS2175_34484170 (41.78%)
CJE1563	Cj1371_6968805 (96.98%)
CJE1564	Cj1372_6968806 (96.83%)
CJE1565	Cj1373_6968807 (98.18%)
CJE1566	Cj1374c_6968808 (99.50%)				WS1795_34483816 (46.77%)
CJE1567	Cj1375_6968809 (97.45%)	HH1614_32263166 (43.71%)	HP1181_2314341 (41.00%)	jhp1107_4155704 (42.33%)	WS1793_34483815 (47.95%)
CJE1568	Cj1377c_6968811 (97.46%)	HH0232_32261779 (36.23%)			WS0730_34482850 (42.43%)
CJE1569	selA_6968812 (98.18%)	selA_32262289 (41.46%)			selA_34482952 (41.50%)
CJE1570	selB_6968813 (99.50%)				SELB_34482951 (43.33%)
CJE1571	Cj1380_6968814 (99.15%)
CJE1572	Cj1381_6968815 (96.59%)
CJE1573	fldA_6968816 (99.39%)	fldA_32262261 (46.01%)	fldA_2314319 (40.49%)	fldA_4155685 (39.88%)	FLDA_34482894 (46.30%)
CJE1574	Cj1383c_6968817 (94.81%)
CJE1575	Cj1384c_6968818 (100.00%)				WS2044_34484048 (72.04%)
CJE1576	katA_6968819 (99.16%)	katA_32261590 (61.34%)	HP0875_2314010 (56.34%)	katA_4155380 (56.13%)
CJE1577	Cj1386_6968820 (100.00%)	yahD_32261589 (59.21%)
CJE1578	Cj1387c_6968821 (99.54%)
CJE1579	Cj1388_6968822 (97.50%)	HH1693_32263245 (52.21%)	HP0944_2314082 (53.91%)	jhp0879_4155446 (54.78%)	WS0502_34482639 (51.30%)
CJE1581	metC'_6968824 (96.83%)
CJE1582	Cj1394_6968825 (96.04%)
CJE1583
CJE1584	Cj1397_6968826 (100.00%)			jhp0533_4155075 (41.18%)	WS0955_34483059 (45.07%)
CJE1586	hydA2_6968828 (98.19%)
CJE1587	fabI_6968829 (99.27%)	HH1313_32262864 (69.26%)	NADH_2313282 (68.27%)	fabI_4154700 (68.63%)	FABI_34482567 (70.74%)
CJE1588	tpiA_6968830 (98.65%)	tpi_32262866 (45.22%)	HP0194_2313281 (47.81%)	tpi_4154699 (48.68%)	TPIA_34482568 (49.13%)
CJE1589	pgk_6968831 (98.75%)	pgk_32261875 (51.26%)	HP1345_2314511 (49.75%)	pgk_4155865 (50.13%)	PGK_34483132 (51.01%)
CJE1590	gapA_6968832 (99.10%)	gap_2_32262040 (54.85%)	HP1346_2314512 (45.90%)	gap_2_4155866 (46.20%)	GAPA_34482494 (56.23%)
CJE1591	Cj1404_6968833 (100.00%)		HP1337_2314504 (40.37%)	jhp1256_4155870 (40.99%)
CJE1592	Cj1405_6968834 (99.07%)	HH0350_32261898 (43.81%)	HP1414_2314589 (52.34%)	jhp1309_4155927 (51.40%)
CJE1593	Cj1406c_6968835 (97.41%)
CJE1594	Cj1407c_6968836 (97.81%)	glmM_1_32262161 (42.64%)	algC_2314440 (44.49%)	jhp1196_4155786 (43.51%)	WS2001_34484007 (46.94%)
CJE1595	fliL_6968837 (98.88%)		HP0809_2313942 (38.25%)	fliL_4155301 (38.25%)	FLIL_34483977 (42.29%)
CJE1596	acpS_6968838 (99.13%)	acpS_32263106 (46.22%)	acpS_2313937 (52.21%)	acpS_4155300 (51.33%)	ACPS_34483978 (48.21%)
CJE1597	Cj1410c_6968839 (100.00%)
CJE1598	Cj1411c_6968840 (100.00%)
CJE1599	Cj1412c_6968841 (99.20%)
CJE1600	Cj1413c_6968842 (97.97%)
CJE1601	Cj1414c_6968843 (91.08%)
CJE1602
CJE1603
CJE1604
CJE1605
CJE1606
CJE1607
CJE1608	Cj1423c_6968852 (86.24%)
CJE1609	gmhA2_6968853 (97.51%)
CJE1610	Cj1425c_6968854 (96.76%)
CJE1611
CJE1612	fcl_6968857 (47.69%)	HH0173_32261720 (53.51%)
CJE1613
CJE1614
CJE1615
CJE1616
CJE1617	kpsF_6968872 (95.87%)	HH1172_32262722 (47.12%)	kpsF_2314601 (40.00%)	jhp1324_4155933 (40.13%)	WS0067_34482235 (47.32%)
CJE1618	kpsD_6968873 (98.73%)
CJE1619	kpsE_6968874 (98.12%)
CJE1620	kpsT_6968875 (99.09%)
CJE1621	kpsM_6968876 (95.00%)
CJE1622	Cj1449c_6968877 (96.30%)
CJE1623	Cj1450_6968878 (97.86%)
CJE1624	dut_6968879 (94.76%)
CJE1625	Cj1452_6968880 (99.58%)
CJE1626	Cj1453c_6968881 (98.44%)		HP0728_2313855 (40.72%)	jhp0665_4155227 (40.07%)	WS1770_34483795 (39.94%)
CJE1627	Cj1454c_6968882 (98.18%)	HH1311_32262862 (49.43%)	HP0734_2313856 (52.07%)	jhp0671_4155233 (52.76%)	WS1769_34483794 (54.84%)
CJE1628	prfB_6968883 (99.45%)	prfB_32262209 (66.58%)	prfB_2313254 (67.59%)	prfB_4154673 (67.31%)	PRFB_34482276 (70.36%)
CJE1629
CJE1630
CJE1631	Cj1457c_6968885 (98.39%)		HP0926_2314063 (44.24%)	jhp0860_4155438 (45.04%)	WS1227_34483310 (48.33%)
CJE1632	thiL_6968886 (98.53%)	thiL_32263386 (36.64%)			THIL_34483353 (42.58%)
CJE1633	Cj1459_6968887 (98.04%)
CJE1634	Cj1460_6968888 (97.64%)
CJE1635	Cj1461_6968889 (97.36%)	HH1553_32263104 (36.36%)	HP0810_2313938 (40.84%)	jhp0746_4155302 (39.79%)	WS1966_34483973 (35.33%)
CJE1636	flgI_6968890 (99.14%)	flgI_32261689 (48.13%)	flgI_2313339 (46.67%)	flgI_4154757 (46.38%)	flgI_34483634 (55.17%)
CJE1637	Cj1463_6968891 (97.35%)		HP0245_2313346 (46.00%)	jhp0230_4154756 (46.00%)
CJE1638	Cj1464_6968892 (98.46%)	flgM_32262423 (35.29%)
CJE1639	Cj1465_6968893 (100.00%)
CJE1640	flgK_6968894 (99.01%)	flgK_32262425 (37.64%)	HAP1_2314271 (36.62%)	flgK_4155652 (36.29%)	HAP1_34482413 (40.52%)
CJE1641	Cj1467_6968895 (99.61%)				WS0258_34482412 (42.04%)
CJE1642	Cj1468_6968896 (99.61%)	HH1654_32263206 (35.55%)			WS1179_34483266 (39.84%)
CJE1643
CJE1644	Cj1471c_6968897 (99.61%)	gspE_32262666 (46.30%)			WS0543_34482678 (40.43%)
CJE1645	Cj1472c_6968898 (98.46%)
CJE1646	Cj1473c_6968899 (100.00%)
CJE1647	Cj1474c_6968900 (98.94%)
CJE1648	Cj1475c_6968901 (100.00%)
CJE1649	Cj1476c_6968902 (99.83%)
CJE1650	Cj1477c_6968903 (98.59%)				WS2133_34484134 (44.50%)
CJE1651	cadF_6968904 (99.37%)
CJE1652	rpsI_6968905 (100.00%)	rpsI_32262047 (79.07%)	rps9_2313164 (77.52%)	rpsI_4154586 (77.52%)	WS2137_34484136 (80.62%)
CJE1653	rplM_6968906 (100.00%)	rplM_32262046 (65.96%)	HP0084_2313165 (61.87%)	rplM_4154587 (61.87%)	RPLM_34484137 (70.29%)
CJE1654	Cj1481c_6968907 (100.00%)
CJE1655	Cj1482c_6968908 (99.75%)
CJE1656	Cj1483c_6968909 (100.00%)
CJE1657	Cj1484c_6968910 (100.00%)
CJE1658	Cj1485c_6968911 (93.94%)
CJE1659	Cj1486c_6968912 (98.61%)
CJE1660	ccoP_6968913 (100.00%)	fixP_32262810 (49.83%)	fixP_2313233 (51.23%)	fixP_4154645 (50.68%)	CCOP_34482342 (52.10%)
CJE1661	ccoQ_6968914 (98.85%)
CJE1662	ccoO_6968915 (99.55%)	fixO_32262808 (62.77%)	fixO_2313232 (66.82%)	fixO_4154643 (65.91%)	CCOO_34482340 (73.18%)
CJE1663	ccoN_6968916 (99.59%)	fixN_32262807 (72.11%)	fixN_2313231 (69.21%)	fixN_4154642 (69.63%)	FIXN_34482339 (71.93%)
CJE1664	Cj1491c_6968917 (99.56%)				WS1434_34483497 (38.53%)
CJE1665	Cj1492c_6968918 (100.00%)
CJE1666	Cj1493c_6968919 (99.54%)
CJE1667	carA_6968920 (100.00%)	carA_32262437 (54.05%)	HP1237_2314401 (57.80%)	carA_4155757 (57.41%)	CARA_34484054 (54.18%)
CJE1668	Cj1495c_6968921 (100.00%)	HH0889_32262438 (42.86%)	HP1236_2314406 (45.86%)	jhp1157_4155756 (45.30%)	WS2051_34484055 (49.17%)
CJE1669	Cj1496c_6968922 (99.42%)
CJE1670	Cj1497c_6968923 (100.00%)
CJE1671	purA_6968924 (99.76%)	purA_32262504 (55.69%)	purA_2313350 (51.82%)	purA_4154770 (52.30%)	PURA_34484060 (56.07%)
CJE1672
CJE1673	Cj1500_6968925 (99.75%)	HH1298_32262849 (48.00%)
CJE1674	Cj1501_6968926 (98.67%)	HH1299_32262850 (67.61%)
CJE1675	putP_6968927 (98.77%)	putP_32261702 (81.29%)	putP_2313133 (74.18%)	putP_4154554 (74.59%)	PUTP_34482956 (68.84%)
CJE1676	putA_6968928 (98.19%)	HH0156_32261703 (70.82%)	HP0056_2313134 (65.36%)	putA_4154555 (65.98%)
CJE1677	selD_6968929 (96.10%)	selD_32263286 (38.38%)			SELD1_34483101 (45.43%)
CJE1678	Cj1505c_6968930 (99.47%)	HH1736_32263288 (35.96%)			WS1001_34483104 (38.46%)
CJE1679	Cj1506c_6968931 (99.57%)	HH0481_32262029 (46.75%)	tlpA_2313179 (38.25%)	jhp0091_4154599 (38.25%)	WS0864_34482974 (36.67%)
CJE1680	Cj1507c_6968932 (99.59%)
CJE1681	fdhD_6968933 (98.46%)	fdhD_32261772 (40.82%)			FDHD_34482950 (44.71%)
CJE1682	fdhC_6968934 (98.06%)	fdhC_32261773 (41.00%)			FDHC_34482199 (48.03%)
CJE1683	fdhB_6968935 (99.53%)	fdhB_32261774 (64.90%)			FDHB_34482200 (70.26%)
CJE1684	fdhA_6968936 (99.68%)	HH0228_32261775 (53.13%)			FDHA_34482854 (61.05%)
CJE1685	Cj1513c_6968937 (98.41%)
CJE1686	Cj1514c_6968938 (100.00%)
CJE1687
CJE1688	Cj1515c_6968939 (98.69%)	nspC_32262367 (42.90%)	nspC_2313093 (45.97%)		WS0166_34482328 (48.96%)
CJE1689	Cj1516_6968940 (98.64%)
CJE1690	moaD_6968941 (98.63%)	moaD_32261593 (56.76%)	moaD_2313939 (60.27%)	moaD_4155307 (57.53%)	MOAD_34483282 (61.64%)
CJE1691	moaE_6968942 (98.64%)	moaE_32261594 (57.34%)	moaE_2313932 (49.65%)	moaE_4155306 (45.39%)	MOAE_34483283 (52.48%)
CJE1692
CJE1693	moeA2_6968943 (98.23%)	moeA_1_32261592 (38.02%)			MOEA2_34483281 (40.65%)
CJE1694	Cj1521c_6968945 (99.30%)
CJE1695	Cj1522c_6968946 (98.65%)
CJE1698
CJE1700	purM_6968948 (98.48%)	purM_32262795 (64.76%)			PURM_34484161 (60.24%)
CJE1701	Cj1530_6968949 (97.01%)	HH1700_32263252 (37.37%)	HP0831_2313965 (37.37%)	jhp0770_4155335 (38.89%)	WS2149_34484147 (37.76%)
CJE1702	dapF_6968950 (98.39%)	dapF_32263253 (39.22%)			DAPF_34484148 (50.21%)
CJE1703	Cj1532_6968951 (97.94%)				WS2151_34484149 (35.59%)
CJE1704	Cj1533c_6968952 (98.55%)
CJE1705	Cj1534c_6968953 (100.00%)	dps_32261757 (43.26%)	napA_2313332 (41.26%)	napA_4154739 (39.86%)	NAPA_34483631 (43.80%)
CJE1706	pgi_6968954 (98.77%)	pgi_32262039 (43.20%)			WS1027_34483129 (44.33%)
CJE1707	galU_6968955 (99.64%)	galU_32262126 (67.21%)	galU_2313766 (60.89%)	galU_4155134 (61.99%)	GALU_34482489 (65.68%)
CJE1708	acs_6968956 (99.54%)	acoE_32261944 (40.60%)	acoE_2314192 (68.97%)		ACS_34482727 (70.80%)
CJE1709	Cj1538c_6968957 (99.40%)
CJE1710	Cj1539c_6968958 (98.25%)				WS1371_34483440 (57.27%)
CJE1711	Cj1540_6968959 (99.63%)				WS1370_34483439 (61.19%)
CJE1712	Cj1541_6968960 (99.61%)
CJE1713	Cj1542_6968961 (99.19%)
CJE1714	Cj1543_6968962 (100.00%)
CJE1715	Cj1544c_6968963 (98.66%)
CJE1716	Cj1545c_6968964 (99.48%)	mdaB_32263023 (66.15%)	HP0630_2313748 (65.62%)	jhp0573_4155125 (65.62%)
CJE1717	Cj1546_6968965 (99.13%)				WS1168_34483257 (40.00%)
CJE1719	Cj1548c_6968967 (98.32%)	cad_32262716 (73.49%)	HP1104_2314257 (65.80%)	jhp1030_4155620 (66.38%)
CJE1721
CJE1723		HH1422_32262973 (65.88%)
CJE1724
CJE1725
CJE1726
CJE1727		HH1460_32263011 (55.88%)
CJE1728		HH1454_32263005 (48.10%)
CJE1730	Cj1560_6968977 (95.26%)
CJE1731					WS0766_34482883 (51.02%)
CJE1732
CJE1733
CJE1735	Cj1564_6968981 (99.54%)
CJE1736	pflA_6968982 (99.87%)
CJE1737	nuoN_6968983 (98.48%)	nuoN_32263141 (35.33%)			WS0488_34482627 (36.12%)
CJE1738	nuoM_6968984 (98.79%)	nuoM_32263142 (39.88%)	HP1272_2314437 (40.08%)	nuoM_4155783 (39.92%)	WS0487_34482626 (43.57%)
CJE1739	nuoL_6968985 (98.99%)	nuoL_32263143 (53.71%)	HP1271_2314436 (54.75%)	nuoL_4155782 (54.43%)	NUOL_34482625 (56.74%)
CJE1740	nuoK_6968986 (100.00%)	nuoK_32263144 (46.88%)	HP1270_2314435 (45.83%)	nuoK_4155781 (44.79%)	NUOK_34482624 (51.61%)
CJE1741	nuoJ_6968987 (98.84%)	nuoJ_32263145 (43.20%)	HP1269_2314434 (39.26%)	nuoJ_4155780 (39.26%)	NUOJ_34482623 (41.92%)
CJE1742	nuoI_6968988 (98.12%)	nuoI_32263146 (52.94%)	NQO9_2314433 (46.76%)	nuoI_4155779 (49.48%)	NUOI_34482622 (60.00%)
CJE1743	nuoH_6968989 (98.19%)	nuoH_32263147 (54.98%)	NQO8_2314432 (54.91%)	nuoH_4155778 (54.91%)	NUOH_34482621 (54.60%)
CJE1744	nuoG_6968990 (99.51%)	nuoG_32263148 (35.46%)
CJE1745	Cj1574c_6968991 (99.57%)
CJE1746	Cj1575c_6968992 (100.00%)	HH1599_32263150 (44.00%)	HP1264_2314442 (52.00%)	nuoE_4155795 (52.00%)	NUOE_34482616 (50.67%)
CJE1747	nuoD_6968993 (100.00%)	nuoD_32263151 (61.88%)	NQO4_2314430 (60.64%)	nuoD_4155794 (60.64%)	NUOD_34482615 (65.93%)
CJE1748	nuoC_6968994 (99.62%)	nuoC_32263152 (41.89%)	NQO5_2314429 (43.98%)	nuoC_4155793 (43.98%)	NUOC_34482614 (48.51%)
CJE1749	nuoB_6968995 (98.80%)	nuoB_32263153 (75.74%)	NQO6_2314428 (80.65%)	nuoB_4155792 (80.00%)	NUOB_34482613 (79.29%)
CJE1750	nuoA_6968996 (99.22%)	nuoA_32263154 (52.24%)	NQO7_2314427 (43.90%)	nuoA_4155791 (43.90%)	NUOA_34482612 (51.16%)
CJE1751	Cj1580c_6968997 (97.74%)	nikE_32261962 (36.61%)
CJE1752	Cj1581c_6968998 (98.31%)
CJE1753	Cj1582c_6968999 (98.47%)
CJE1754	Cj1583c_6969000 (97.45%)
CJE1755	Cj1584c_6969001 (90.02%)
CJE1756	Cj1585c_6969002 (99.02%)	dld_32262819 (44.28%)	HP1222_2314381 (49.01%)	dld_4155750 (50.20%)
CJE1758	Cj1587c_6969004 (100.00%)
CJE1760
CJE1761
CJE1762	infA_6969007 (100.00%)	infA_32262950 (77.78%)	infA_2314483 (83.33%)	infA_4155828 (83.33%)	infA_34483726 (86.11%)
CJE1763	rpmJ_6969008 (100.00%)		HP1297_2314486 (75.68%)	rpmJ_4155827 (78.38%)
CJE1764	rpsM_6969009 (100.00%)	rpsM_32262951 (78.33%)	HP1296_2314462 (78.33%)	rpsM_4155844 (75.83%)	RPSM_34483725 (81.82%)
CJE1765	rpsK_6969010 (100.00%)	rpsK_32262952 (83.08%)	HP1295_2314461 (83.97%)	rpsK_4155843 (83.21%)	RPSK_34483724 (80.92%)
CJE1766	rpsD_6969011 (99.04%)	rpsD_32262953 (82.69%)	rps4_2314460 (76.44%)	rpsD_4155842 (76.92%)	RPSD_34483723 (80.77%)
CJE1767	rpoA_6969012 (99.70%)	rpoA_32262954 (51.49%)	rpoA_2314459 (45.77%)	rpoA_4155841 (45.77%)	RPOA_34483722 (54.82%)
CJE1768	rplQ_6969013 (100.00%)	rplQ_32262955 (70.69%)	HP1292_2314458 (73.28%)	rplQ_4155840 (73.28%)	RPLQ_34483721 (74.14%)
CJE1769	hisG_6969014 (100.00%)
CJE1770	hisD_6969015 (99.30%)	hisD_32263273 (40.05%)			HISD_34483629 (42.04%)
CJE1771	hisB_6969016 (99.43%)
CJE1772	hisH_6969017 (100.00%)
CJE1773	hisA_6969018 (97.53%)	hisA_32262375 (35.80%)			hisA_34482749 (39.66%)
CJE1774	Cj1602_6969019 (90.57%)		HP0852_2313999 (36.93%)	jhp0788_4155368 (39.29%)
CJE1775	hisF_6969020 (100.00%)	hisF_32262726 (49.61%)			HISF_34482232 (49.61%)
CJE1776	hisI_6969021 (100.00%)				WS0090_34482257 (39.62%)
CJE1777	dapD_6969022 (99.74%)	dapD_32262268 (49.38%)	dapD_2313754 (48.52%)	dapD_4155122 (49.01%)	DAPD_34482901 (49.13%)
CJE1778	mrp_6969023 (99.18%)	mpr_32263056 (57.78%)	HP0207_2313292 (49.86%)	jhp0193_4154712 (49.32%)	MRP_34483952 (61.35%)
CJE1779	Cj1607_6969024 (99.73%)	HH1582_32263133 (46.58%)	HP1020_2314164 (42.59%)	jhp0404_4154934 (41.94%)	WS1940_34483950 (47.20%)
CJE1780	Cj1608_6969025 (99.66%)	HH1583_32263134 (38.13%)			WS1939_34483949 (45.67%)
CJE1781	Cj1609_6969026 (99.22%)				WS1938_34483948 (38.13%)
CJE1782	pgpA_6969027 (100.00%)	pgpA_32263135 (52.74%)	HP0737_2313859 (47.10%)	pgpA_4155236 (50.33%)	PGPA_34483947 (43.87%)
CJE1783	rpsT_6969028 (98.85%)	rpsT_32263330 (60.92%)	HP0076_2313157 (67.82%)	rpsT_4154580 (67.82%)	WS0817_34482931 (65.52%)
CJE1784	prfA_6969029 (99.15%)	prfA_32263329 (68.57%)	prfA_2313158 (66.95%)	prfA_4154581 (66.67%)	PRFA_34482930 (68.18%)
CJE1785	Cj1613c_6969030 (98.80%)	HH1254_32262805 (53.10%)	HP0318_2313418 (55.28%)	jhp0301_4154832 (54.47%)
CJE1786	chuA_6969031 (93.04%)
CJE1787	chuB_6969032 (99.09%)				WS1123_34483215 (37.59%)
CJE1788	chuC_6969033 (96.90%)
CJE1789	chuD_6969034 (98.88%)
CJE1791	kgtP_6969036 (100.00%)		kgtP_2314243 (49.88%)	kgtP_4154842 (47.02%)
CJE1792	mutY_6969037 (97.94%)	mutY_32262792 (48.67%)	mutY_2313226 (47.02%)	mutY_4154640 (47.18%)	MUTY_34482862 (47.69%)
CJE1793	Cj1621_6969038 (98.40%)
CJE1794	ribD_6969039 (98.77%)	ribD_32262387 (36.09%)	ribG_2314679 (39.38%)	ribD_4156003 (40.31%)	RIBD_34484025 (41.58%)
CJE1795	Cj1623_6969040 (97.11%)
CJE1796	sdaA_6969041 (98.90%)		sdaA_2313218 (54.07%)	sdaB_4154627 (53.41%)
CJE1797	sdaC_6969042 (99.28%)		sdaC_2313219 (41.77%)	sdaC_4154628 (42.01%)
CJE1798	Cj1626c_6969043 (100.00%)
CJE1799	Cj1627c_6969044 (98.38%)
CJE1800	exbB2_6969045 (99.29%)	HH0353_32261901 (58.99%)	exbB_2314506 (53.68%)	exbB_2_4155859 (53.96%)	EXBB2_34483492 (51.77%)
CJE1801	exbD2_6969046 (100.00%)	HH0354_32261902 (57.14%)	exbD_2314507 (49.61%)	exbD_2_4155860 (49.61%)	EXBD2_34483491 (47.62%)
CJE1803	Cj1631c_6969048 (93.36%)
CJE1804	Cj1632c_6969049 (43.55%)
CJE1805	Cj1633_6969050 (98.78%)				WS1903_34483916 (48.16%)
CJE1806	aroC_6969051 (98.90%)	aroC_32262249 (56.39%)	aroC_2313786 (53.01%)	aroC_4155160 (53.28%)	aroC_34483911 (56.23%)
CJE1807	rnc_6969052 (98.21%)	rnc_32262248 (58.18%)	HP0662_2313785 (50.70%)	rnc_4155159 (50.70%)	RNC_34483912 (60.73%)
CJE1808	rnhA_6969053 (100.00%)	rnhA_32262247 (51.85%)	rnhA_2313784 (57.66%)	rnhA_4155158 (57.66%)	RNHA_34483913 (57.66%)
CJE1809	Cj1637c_6969054 (99.39%)
CJE1810	dnaG_6969055 (98.35%)	dnaG_32262749 (39.39%)			dnaG_34483915 (41.03%)
CJE1811	Cj1639_6969056 (100.00%)	HH1867_32263419 (54.12%)	HP1492_2314672 (52.22%)	jhp1385_4156005 (52.22%)	WS1690_34483720 (52.94%)
CJE1812	Cj1640_6969057 (100.00%)
CJE1813	murE_6969058 (99.53%)	murE_32263417 (46.57%)	murE_2314673 (48.94%)	murE_4156007 (48.72%)	murE_34483718 (48.44%)
CJE1814	Cj1642_6969059 (100.00%)	ybaB_32261880 (53.19%)	HP0035_2313110 (46.81%)	jhp0031_4154536 (47.42%)	WS1681_34483711 (63.04%)
CJE1815	Cj1643_6969060 (98.90%)
CJE1816	ispA_6969061 (99.64%)	ispA_32261882 (48.91%)	ispA_2314066 (49.27%)	ispA_4155442 (47.84%)	ISPA_34483709 (55.60%)
CJE1817	tkt_6969062 (99.53%)	tktA_32261573 (57.35%)	tktA_2314236 (60.06%)	tktA_4154867 (60.22%)	WS0561_34482695 (60.94%)
CJE1818	iamB_6969063 (98.10%)	HH1124_32262674 (40.53%)	HP1466_2314643 (40.55%)	jhp1359_4155971 (40.27%)	WS2023_34484029 (42.25%)
CJE1819	iamA_6969064 (99.17%)	HH1123_32262673 (48.71%)	HP1465_2314642 (40.71%)	jhp1358_4155970 (40.71%)	WS2022_34484028 (43.04%)
CJE1820	Cj1648_6969065 (98.99%)
CJE1821	Cj1649_6969066 (97.49%)
CJE1822	Cj1650_6969067 (98.80%)
CJE1823	map_6969068 (99.60%)	map_32262949 (56.57%)	HP1299_2314463 (57.83%)	map_4155829 (58.23%)	MAP_34483727 (61.85%)
CJE1824	murI_6969069 (99.19%)	murI_32261571 (56.28%)	HP0549_2313665 (53.70%)	murI_4155036 (54.09%)	MURI_34482923 (55.69%)
CJE1825	Cj1653c_6969070 (99.34%)
CJE1826	nhaA2_6969071 (99.23%)
CJE1827	nhaA1_6969072 (99.74%)
CJE1828	Cj1656c_6969073 (96.67%)
CJE1829
CJE1830	Cj1658_6969074 (97.99%)				WS1566_34483610 (38.35%)
CJE1831	p19_6969075 (100.00%)				WS1564_34483609 (63.07%)
CJE1832	Cj1660_6969076 (97.86%)				WS1562_34483608 (39.87%)
CJE1833	Cj1661_6969077 (97.67%)				WS1561_34483607 (51.99%)
CJE1834	Cj1662_6969078 (98.66%)				WS1560_34483606 (44.80%)
CJE1835	Cj1663_6969079 (99.54%)	HH1857_32263409 (45.25%)			WS1559_34483605 (66.51%)
CJE1836	Cj1664_6969080 (100.00%)				WS1558_34483604 (38.97%)
CJE1837	Cj1665_6969081 (99.40%)
CJE1838	Cj1666c_6969082 (97.93%)				WS0556_34482690 (44.92%)
CJE1839	Cj1667c_6969083 (89.13%)
CJE1840
CJE1841	Cj1669c_6969085 (99.29%)
CJE1842	Cj1670c_6969086 (99.55%)
CJE1843	Cj1671c_6969087 (100.00%)
CJE1844	eno_6969088 (99.28%)	eno_32262179 (65.40%)	HP0154_2313236 (63.27%)	eno_4154655 (63.03%)	WS1494_34483549 (64.61%)
CJE1845	recA_6969089 (100.00%)	recA_32262181 (75.29%)	recA_2313235 (76.97%)	recA_4154654 (75.80%)	RECA_34483548 (77.19%)
CJE1846	Cj1674_6969090 (97.90%)	HH0634_32262183 (64.08%)	HP0152_2313242 (58.04%)	jhp0140_4154665 (57.34%)	WS1492_34483547 (65.85%)
CJE1847	fliQ_6969091 (100.00%)	fliQ_32261986 (64.63%)	fliQ_2314593 (60.47%)	fliQ_4155919 (60.47%)	FLIQ_34483545 (62.35%)
CJE1848	murB_6969092 (96.51%)	murB_32261987 (43.56%)	murB_2314592 (41.92%)	murB_4155918 (43.24%)	MURB_34483544 (47.08%)
CJE1849	Cj1680c_6969096 (97.61%)
CJE1850	cysQ_6969097 (98.82%)
CJE1851	gltA_6969098 (100.00%)	gltA_32263044 (54.23%)	gltA_2313103 (53.05%)	gltA_4154527 (53.05%)	GLTA_34483515 (54.39%)
CJE1852	Cj1684c_6969099 (98.98%)	kefB_1_32262019 (37.30%)	napA_2314343 (35.47%)	jhp1109_4155698 (35.20%)	WS1342_34483416 (38.62%)
CJE1853	bioB_6969100 (99.28%)	bioB_32263283 (51.62%)	bioB_2314578 (52.86%)	bioB_4155907 (53.57%)	BIOB_34483555 (52.54%)
CJE1854	topA_6969101 (99.86%)	topA_32263350 (42.66%)	topA_2313198 (55.97%)	topA_1_4154624 (56.26%)	TOPA_34483556 (58.07%)
CJE1855	Cj1687_6969102 (99.76%)	HH1267_32262818 (41.91%)
CJE1856	secY_6969103 (100.00%)	secY_32262948 (71.73%)	secY_2314464 (71.26%)	secY_4155830 (71.50%)	SECY_34483728 (74.58%)
CJE1857	rplO_6969104 (100.00%)	rplO_32262947 (66.40%)	HP1301_2314465 (63.57%)	rplO_4155831 (63.57%)	RPLO_34483729 (72.44%)
CJE1858	rpsE_6969105 (100.00%)	rpsE_32262946 (81.69%)	rps5_2314466 (81.51%)	rpsE_4155832 (81.51%)	RPSE_34483730 (80.28%)
CJE1859	rplR_6969106 (99.15%)	rplR_32262945 (61.86%)	HP1303_2314467 (58.47%)	rplR_4155833 (58.47%)	RPLR_34483731 (61.02%)
CJE1860	rplF_6969107 (100.00%)	rplF_32262944 (63.48%)	rpl6_2314468 (67.42%)	rplF_4155834 (66.29%)	RPLF_34483732 (69.10%)
CJE1861	rpsH_6969108 (99.24%)	rpsH_32262943 (66.41%)	rps8_2314469 (62.60%)	rpsH_4155835 (62.60%)	RPSH_34483733 (69.47%)
CJE1862	rpsN_6969109 (100.00%)		HP1306_2314484 (90.16%)	rpsN_4155818 (88.52%)
CJE1863	rplE_6969110 (100.00%)	rplE_32262941 (69.61%)	rpl5_2314470 (67.04%)	rplE_4155819 (67.04%)	RPLE_34483734 (70.72%)
CJE1864	rplX_6969111 (100.00%)	rplX_32262940 (69.86%)	HP1308_2314471 (70.83%)	rplX_4155820 (70.83%)	RPLX_34483735 (64.86%)
CJE1865	rplN_6969112 (100.00%)	rplN_32262939 (87.70%)	HP1309_2314472 (81.97%)	rplN_4155821 (80.33%)	RPLN_34483736 (90.98%)
CJE1866	rpsQ_6969113 (100.00%)	rpsQ_32262938 (59.76%)	HP1310_2314473 (67.09%)	rpsQ_4155822 (67.09%)	RPSQ_34483737 (68.29%)
CJE1867	rpmC_6969114 (100.00%)	rpmC_32262937 (64.41%)	HP1311_2314485 (61.02%)	rpmC_4155823 (61.02%)
CJE1868	rplP_6969115 (100.00%)	rplP_32262936 (74.47%)	HP1312_2314474 (75.18%)	rplP_4155824 (74.47%)	RPLP_34483738 (75.18%)
CJE1869	rpsC_6969116 (100.00%)	rpsC_32262935 (71.06%)	rps3_2314475 (72.53%)	rpsC_4155825 (72.53%)	RPSC_34483739 (73.39%)
CJE1870	rplV_6969117 (98.58%)		HP1314_2314476 (58.33%)	rplV_4155826 (59.17%)
CJE1871	rpsS_6969118 (100.00%)	rpsS_32262933 (84.95%)	HP1315_2314477 (80.65%)	rpsS_4155812 (79.57%)	WS1712_34483741 (82.80%)
CJE1872	rplB_6969119 (100.00%)	rplB_32262932 (75.18%)	rpl2_2314478 (74.64%)	rplB_4155813 (75.00%)	RPLB_34483742 (78.10%)
CJE1873	rplW_6969120 (100.00%)	rplW_32262931 (66.29%)	HP1317_2314479 (65.91%)	rplW_4155814 (65.91%)	RPLW_34483743 (67.78%)
CJE1874	rplD_6969121 (99.51%)	rplD_32262930 (57.14%)	rpl4_2314480 (50.71%)	rplD_4155815 (50.71%)	RPLD_34483744 (59.31%)
CJE1875	rplC_6969122 (99.48%)	rplC_32262929 (67.21%)	rpl3_2314481 (64.02%)	rplC_4155816 (64.02%)	RPLC_34483745 (72.40%)
CJE1876	rpsJ_6969123 (100.00%)	rpsJ_32262928 (80.58%)	HP1320_2314482 (78.22%)	rpsJ_4155817 (78.22%)
CJE1877
CJE1878	Cj1709c_6969124 (99.60%)	HH0717_32262266 (49.80%)	HP1459_2314637 (50.40%)	jhp1352_4155973 (50.40%)	WS1979_34483986 (54.80%)
CJE1879	Cj1710c_6969125 (99.70%)	HH1173_32262723 (61.82%)	HP1430_2314602 (55.64%)	jhp1323_4155934 (55.49%)	WS0066_34482234 (62.52%)
CJE1880	ksgA_6969126 (99.62%)	ksgA_32262724 (43.35%)	ksgA_2314603 (41.45%)	ksgA_4155935 (42.34%)	KSGA_34482233 (46.06%)
CJE1881	Cj1712_6969127 (98.31%)	HH1177_32262727 (44.02%)	punB_2314710 (40.34%)	jhp1418_4156039 (42.05%)	WS0063_34482231 (44.94%)
CJE1882	Cj1713_6969128 (98.60%)	HH1178_32262728 (55.98%)	HP1428_2314600 (56.21%)	jhp1325_4155932 (55.65%)	WS0062_34482230 (59.32%)
CJE1883	Cj1714_6969129 (96.88%)
CJE1884
CJE1885	Cj1715_6969130 (98.86%)
CJE1886	leuD_6969131 (99.00%)
CJE1887	leuC_6969132 (99.79%)
CJE1888	leuB_6969133 (98.60%)	leuB_32262684 (51.60%)			WS1813_34483832 (52.12%)
CJE1889	leuA_6969134 (99.02%)				LEUA_34482755 (48.04%)
CJE1890	Cj1720_6969135 (100.00%)
CJE1891	Cj1721c_6969136 (65.42%)
CJE1892	Cj1724c_6969139 (99.21%)				WS0003_34482176 (64.46%)
CJE1893	Cj1725_6969140 (99.50%)				WS2045_34484049 (42.86%)
CJE1894	metA_6969141 (100.00%)	metA_32262186 (56.57%)
CJE1895	metY_6969142 (99.29%)	metY_32262185 (66.11%)			METY_34483908 (50.96%)
CJE1896
CJE1897	ruvC_6969145 (99.38%)	ruvC_32262661 (69.43%)	ruvC_2314012 (65.38%)	ruvC_4155374 (65.61%)	RUVC_34481796 (73.25%)
	Cj0008_6967513
	Cj0014c_6967519
	Cj0031_6967536
	Cj0032_6967537
	Cj0033_6967538
	Cj0055c_6967553
	Cj0056c_6967554
	Cj0170_6967663
	Cj0171_6967664
	Cj0176c_6967669
	Cj0203_6967696
	Cj0241c_6967719
	Cj0246c_6967723				WS0432_34482574 (37.43%)
	Cj0247c_6967724
	Cj0260c_6967737
	Cj0264c_6967741				WS1849_34483866 (44.56%)
	Cj0265c_6967742	HH0951_32262501 (42.94%)
	Cj0295_6967769
	Cj0344_6967819
	Cj0416_6967890
	Cj0417_6967891
	Cj0423_6967897
	Cj0424_6967898
	Cj0425_6967899
	Cj0455c_6967926
	Cj0522_6967990
	Cj0523_6967991
	Cj0524_6967992
	Cj0560_6968028
	Cj0566_6968033
	Cj0567_6968034
	Cj0568_6968035
	Cj0569_6968036
	Cj0570_6968037		HP0729_2313864 (85.07%)	jhp0666_4155228 (82.82%)
	Cj0617_6968084
	Cj0618_6968085
	Cj0628_6968095
	Cj0629_6968096
	Cj0660c_6968122
	Cj0672_6968134
	Cj0703_6968160	HH0529_32262077 (52.23%)	HP0406_2313513 (51.32%)	jhp0975_4155568 (50.66%)	WS2120_34484122 (52.26%)
	Cj0736_6968193
	Cj0737_6968194
	Cj0738_6968195
	Cj0739_6968196
	Cj0740_6968197
	Cj0741_6968198
	Cj0747_6968199
	Cj0748_6968200
	Cj0814_6968260
	Cj0815_6968261
	Cj0816_6968262
	Cj0818_6968264
	Cj0819_6968265
	Cj0864_6968310
	Cj0873c_6968313
	Cj0874c_6968314
	Cj0876c_6968315
	Cj0877c_6968316
	Cj0952c_6968389
	Cj0967_6968403
	Cj0968_6968404
	Cj0970_6968405
	Cj0971_6968406
	Cj0973_6968408
	Cj0974_6968409
	Cj0975_6968410
	Cj0986c_6968421
	Cj0987c_6968422
	Cj0988c_6968423
	Cj0989_6968424
	Cj1031_6968467
	Cj1055c_6968491	HH1499_32263050 (37.33%)
	Cj1136_6968570
	Cj1137c_6968571
	Cj1140_6968574
	Cj1144c_6968578
	Cj1145c_6968579
	Cj1158c_6968591
	Cj1159c_6968592
	Cj1160c_6968593
	Cj1240c_6968673
	Cj1255_6968688
	Cj1257c_6968690
	Cj1287c_6968719	HH1094_32262644 (57.87%)			WS0171_34482333 (56.71%)
	Cj1297_6968731
	Cj1301_6968735
	Cj1305c_6968739
	Cj1306c_6968740
	Cj1309c_6968743
	Cj1321_6968755
	Cj1322_6968756
	Cj1323_6968757
	Cj1324_6968758
	Cj1325_6968759
	Cj1326_6968760
	Cj1335_6968769
	Cj1336_6968770
	Cj1376_6968810
	Cj1416c_6968845	HH1439_32262990 (65.08%)			WS2178_34484173 (51.37%)
	Cj1417c_6968846	HH1437_32262988 (51.76%)			WS2179_34484174 (42.39%)
	Cj1418c_6968847	HH1436_32262987 (61.64%)			WS2180_34484175 (51.35%)
	Cj1419c_6968848	HH1427_32262978 (78.35%)
	Cj1420c_6968849	HH1426_32262977 (75.27%)			WS2181_34484176 (64.84%)
	Cj1421c_6968850
	Cj1422c_6968851
	Cj1426c_6968855
	Cj1427c_6968856
	Cj1429c_6968858
	Cj1430c_6968859
	Cj1431c_6968860
	Cj1432c_6968861
	Cj1433c_6968862
	Cj1434c_6968863
	Cj1435c_6968864
	Cj1436c_6968865
	Cj1437c_6968866
	Cj1438c_6968867
	Cj1440c_6968869
	Cj1442c_6968871
	Cj1456c_6968884
	Cj1520_6968944
	Cj1523c_6968947
	Cj1547_6968966
	Cj1549c_6968968
	Cj1550c_6968969
	Cj1551c_6968970
	Cj1552c_6968972
	Cj1553c_6968973
	Cj1555c_6968974	HH1057_32262607 (50.94%)
	Cj1556_6968975	HH1056_32262606 (78.50%)
	Cj1558_6968976
	Cj1561_6968978
	Cj1562_6968979
	Cj1563c_6968980	HH1087_32262637 (45.30%)
	Cj1586_6969003
	Cj1588c_6969005
	Cj1589_6969006
	Cj1618c_6969035			jhp0515_4155054 (36.08%)	WS1355_34483428 (36.65%)
	Cj1668c_6969084
	Cj1677_6969093
	Cj1678_6969094
	Cj1679_6969095
	Cj1722c_6969137
	Cj1723c_6969138
	Cj1728c_6969143
	ald'_6967960
	ceuE_6968789
	cysC_6968844	cysC_32262989 (42.86%)			CYSC_34484177 (52.15%)
	feoB_6968827		feoB_2313813 (49.48%)	feoB_4155172 (49.91%)
	flgE2_6969144
	glf_6968868	glf_32261750 (38.20%)
	glpT'_6967766
	hrcA_6968203
	kdpB_6968135
	kdpD'_6968136
	kfiD_6968870
	metC'_6968823
	neuA1_6968577
	neuB1_6968575
	neuC1_6968576
	tonB2_6969047
	uxaA'_6967953
[truncated: 3,014 more rows]
